# Supplementary material
Source: publisher figshare collection journal article supplement (https://frontiersin.figshare.com/ndownloader/files/34077857)
Supplement: Supplementary file 1 [file 34077857]

## Sheet: Upregulated Biological Processe
S20. ToppGene biological processes output for genes with increased expression levels in Male embryos from IVP compared to AI on d32
Category	ID	Name	p-value	q-value FDR B&H	Hit Count in Query List	Hit in Query List
GO: Biological Process	GO:1901147	mesenchymal cell apoptotic process involved in metanephric nephron morphogenesis	0.0001568	0.008657	2	PAX8,PAX2
GO: Biological Process	GO:0072004	kidney field specification	0.0001568	0.008657	2	PAX8,PAX2
GO: Biological Process	GO:2000594	positive regulation of metanephric DCT cell differentiation	0.0001568	0.008657	2	PAX8,PAX2
GO: Biological Process	GO:1900214	regulation of apoptotic process involved in metanephric collecting duct development	0.0001568	0.008657	2	PAX8,PAX2
GO: Biological Process	GO:1900215	negative regulation of apoptotic process involved in metanephric collecting duct development	0.0001568	0.008657	2	PAX8,PAX2
GO: Biological Process	GO:1900218	negative regulation of apoptotic process involved in metanephric nephron tubule development	0.0001568	0.008657	2	PAX8,PAX2
GO: Biological Process	GO:1900217	regulation of apoptotic process involved in metanephric nephron tubule development	0.0001568	0.008657	2	PAX8,PAX2
GO: Biological Process	GO:1900205	apoptotic process involved in metanephric nephron tubule development	0.0001568	0.008657	2	PAX8,PAX2
GO: Biological Process	GO:1900204	apoptotic process involved in metanephric collecting duct development	0.0001568	0.008657	2	PAX8,PAX2
GO: Biological Process	GO:2000592	regulation of metanephric DCT cell differentiation	0.0001568	0.008657	2	PAX8,PAX2
GO: Biological Process	GO:0072305	negative regulation of mesenchymal cell apoptotic process involved in metanephric nephron morphogenesis	0.0001568	0.008657	2	PAX8,PAX2
GO: Biological Process	GO:0072304	regulation of mesenchymal cell apoptotic process involved in metanephric nephron morphogenesis	0.0001568	0.008657	2	PAX8,PAX2
GO: Biological Process	GO:0039003	pronephric field specification	0.0001568	0.008657	2	PAX8,PAX2
GO: Biological Process	GO:0039017	pattern specification involved in pronephros development	0.0001568	0.008657	2	PAX8,PAX2
GO: Biological Process	GO:0072240	metanephric DCT cell differentiation	0.0004607	0.01623	2	PAX8,PAX2
GO: Biological Process	GO:0072275	metanephric glomerulus morphogenesis	0.0004607	0.01623	2	PDGFRA,PDGFRB
GO: Biological Process	GO:0072277	metanephric glomerular capillary formation	0.0004607	0.01623	2	PDGFRA,PDGFRB
GO: Biological Process	GO:0072276	metanephric glomerulus vasculature morphogenesis	0.0004607	0.01623	2	PDGFRA,PDGFRB
GO: Biological Process	GO:0072003	kidney rudiment formation	0.0004607	0.01623	2	PAX8,PAX2
GO: Biological Process	GO:0072069	DCT cell differentiation	0.0004607	0.01623	2	PAX8,PAX2
GO: Biological Process	GO:0038086	VEGF-activated platelet-derived growth factor receptor signaling pathway	0.0004607	0.01623	2	PDGFRA,PDGFRB
GO: Biological Process	GO:0038091	positive regulation of cell proliferation by VEGF-activated platelet derived growth factor receptor signaling pathway	0.0004607	0.01623	2	PDGFRA,PDGFRB
GO: Biological Process	GO:0072309	mesenchymal stem cell maintenance involved in metanephric nephron morphogenesis	0.0004607	0.01623	2	PAX8,PAX2
GO: Biological Process	GO:0072108	positive regulation of mesenchymal to epithelial transition involved in metanephros morphogenesis	0.0009137	0.02456	2	PAX8,PAX2
GO: Biological Process	GO:1901145	mesenchymal cell apoptotic process involved in nephron morphogenesis	0.0009137	0.02456	2	PAX8,PAX2
GO: Biological Process	GO:0072289	metanephric nephron tubule formation	0.0009137	0.02456	2	PAX8,PAX2
GO: Biological Process	GO:0072040	negative regulation of mesenchymal cell apoptotic process involved in nephron morphogenesis	0.0009137	0.02456	2	PAX8,PAX2
GO: Biological Process	GO:0072039	regulation of mesenchymal cell apoptotic process involved in nephron morphogenesis	0.0009137	0.02456	2	PAX8,PAX2
GO: Biological Process	GO:0060594	mammary gland specification	0.0009137	0.02456	2	GLI3,PAX3
GO: Biological Process	GO:1900212	negative regulation of mesenchymal cell apoptotic process involved in metanephros development	0.0009137	0.02456	2	PAX8,PAX2
GO: Biological Process	GO:1900211	regulation of mesenchymal cell apoptotic process involved in metanephros development	0.0009137	0.02456	2	PAX8,PAX2
GO: Biological Process	GO:1900200	mesenchymal cell apoptotic process involved in metanephros development	0.0009137	0.02456	2	PAX8,PAX2
GO: Biological Process	GO:0033563	dorsal/ventral axon guidance	0.0009137	0.02456	2	DCC,SLIT2
GO: Biological Process	GO:0061771	response to caloric restriction	0.0009137	0.02456	2	APOE,LDLR
GO: Biological Process	GO:0072221	metanephric distal convoluted tubule development	0.00151	0.03409	2	PAX8,PAX2
GO: Biological Process	GO:0072278	metanephric comma-shaped body morphogenesis	0.00151	0.03409	2	PDGFRB,PAX8
GO: Biological Process	GO:0065001	specification of axis polarity	0.00151	0.03409	2	AHI1,BCOR
GO: Biological Process	GO:0060023	soft palate development	0.00151	0.03409	2	SOX11,COL11A2
GO: Biological Process	GO:1903566	positive regulation of protein localization to cilium	0.00151	0.03409	2	CCDC88A,CROCC
GO: Biological Process	GO:0072025	distal convoluted tubule development	0.00151	0.03409	2	PAX8,PAX2
GO: Biological Process	GO:1904673	negative regulation of somatic stem cell population maintenance	0.00151	0.03409	2	PAX8,PAX2
GO: Biological Process	GO:0072103	glomerulus vasculature morphogenesis	0.002247	0.04329	2	PDGFRA,PDGFRB
GO: Biological Process	GO:0072104	glomerular capillary formation	0.002247	0.04329	2	PDGFRA,PDGFRB
GO: Biological Process	GO:0072174	metanephric tubule formation	0.002247	0.04329	2	PAX8,PAX2
GO: Biological Process	GO:0072284	metanephric S-shaped body morphogenesis	0.002247	0.04329	2	PDGFRB,PAX8
GO: Biological Process	GO:0035790	platelet-derived growth factor receptor-alpha signaling pathway	0.002247	0.04329	2	PDGFRA,CBLB
GO: Biological Process	GO:0021631	optic nerve morphogenesis	0.002247	0.04329	2	GLI3,PAX2
GO: Biological Process	GO:0015015	heparan sulfate proteoglycan biosynthetic process, enzymatic modification	0.002247	0.04329	2	HS6ST1,HS3ST5
GO: Biological Process	GO:2000739	regulation of mesenchymal stem cell differentiation	0.002247	0.04329	2	PDGFRA,SOX6
GO: Biological Process	GO:0099641	anterograde axonal protein transport	0.0001522	0.008657	3	MAP1A,MAPK8IP3,HSPB1
GO: Biological Process	GO:0072497	mesenchymal stem cell differentiation	0.0002154	0.01035	3	PDGFRA,SOX6,KRT18
GO: Biological Process	GO:0048793	pronephros development	0.0002154	0.01035	3	AHI1,PAX8,PAX2
GO: Biological Process	GO:1905383	protein localization to presynapse	0.0002934	0.01303	3	MAP1A,MAPK8IP3,HSPB1
GO: Biological Process	GO:0010457	centriole-centriole cohesion	0.0006296	0.02042	3	CNTLN,CEP250,CROCC
GO: Biological Process	GO:0072224	metanephric glomerulus development	0.001144	0.02954	3	PDGFRA,PDGFRB,PAX2
GO: Biological Process	GO:0099640	axo-dendritic protein transport	0.001144	0.02954	3	MAP1A,MAPK8IP3,HSPB1
GO: Biological Process	GO:0048557	embryonic digestive tract morphogenesis	0.002157	0.04329	3	SOX11,PDGFRA,GLI3
GO: Biological Process	GO:0048668	collateral sprouting	0.0008152	0.02402	4	DCC,PTPRS,COBL,CRABP2
GO: Biological Process	GO:0072210	metanephric nephron development	0.001987	0.04164	4	PDGFRA,PDGFRB,PAX8,PAX2
GO: Biological Process	GO:0060323	head morphogenesis	0.002553	0.04781	4	MYH3,PDGFRA,SSBP3,COL1A1
GO: Biological Process	GO:0060351	cartilage development involved in endochondral bone morphogenesis	0.0001179	0.008657	5	CER1,HOXD11,COL1A1,COL9A1,COL27A1
GO: Biological Process	GO:0007616	long-term memory	0.0001892	0.009731	5	NTRK2,GRIA1,APOE,LDLR,LRRN4
GO: Biological Process	GO:0010092	specification of animal organ identity	0.0001892	0.009731	5	HOXD11,PAX8,GLI3,PAX2,PAX3
GO: Biological Process	GO:0038084	vascular endothelial growth factor signaling pathway	0.0004259	0.01623	5	PDGFRA,PDGFRB,HSPB1,JCAD,ADAMTS3
GO: Biological Process	GO:0045104	intermediate filament cytoskeleton organization	0.0006584	0.02118	5	EPPK1,EVPL,PKP1,KRT18,PRPH
GO: Biological Process	GO:0048546	digestive tract morphogenesis	0.0007145	0.02246	5	SOX11,AHI1,PDGFRA,GLI3,SFRP5
GO: Biological Process	GO:0045103	intermediate filament-based process	0.0007145	0.02246	5	EPPK1,EVPL,PKP1,KRT18,PRPH
GO: Biological Process	GO:0010171	body morphogenesis	0.00105	0.02786	5	MYH3,PDGFRA,SSBP3,CDON,COL1A1
GO: Biological Process	GO:0032964	collagen biosynthetic process	0.00149	0.03409	5	PDGFRB,COL1A1,COL5A1,ADAMTS3,EMILIN1
GO: Biological Process	GO:0060350	endochondral bone morphogenesis	0.00149	0.03409	5	CER1,HOXD11,COL1A1,COL9A1,COL27A1
GO: Biological Process	GO:1905515	non-motile cilium assembly	0.001812	0.03938	5	AHI1,CC2D2A,CEP89,CEP250,CEP131
GO: Biological Process	GO:0071230	cellular response to amino acid stimulus	0.002316	0.04402	5	PDGFRA,COL1A1,ZEB1,COL16A1,NTRK2
GO: Biological Process	GO:0031102	neuron projection regeneration	0.002604	0.04814	5	MAPK8IP3,PTPRS,PRRX1,TNC,APOE
GO: Biological Process	GO:0030199	collagen fibril organization	0.0001327	0.008657	6	COL1A1,COL5A1,COL11A1,COL11A2,ADAMTS3,EMILIN1
GO: Biological Process	GO:0035924	cellular response to vascular endothelial growth factor stimulus	0.0003731	0.01571	6	PDGFRA,PDGFRB,NR4A1,HSPB1,JCAD,ADAMTS3
GO: Biological Process	GO:0050771	negative regulation of axonogenesis	0.0004004	0.01623	6	DCC,SYNGAP1,SLIT2,PTPRS,SEMA3B,SEMA5A
GO: Biological Process	GO:0072028	nephron morphogenesis	0.0008169	0.02402	6	AHI1,PDGFRB,HOXD11,PAX8,GLI3,PAX2
GO: Biological Process	GO:0060021	roof of mouth development	0.001671	0.03699	6	SOX11,PDGFRA,BCOR,GLI3,PRRX1,COL11A2
GO: Biological Process	GO:1901879	regulation of protein depolymerization	0.001847	0.03971	6	IQANK1,MAP1A,SPTBN5,NAV3,BMERB1,SEMA5A
GO: Biological Process	GO:0060993	kidney morphogenesis	0.002348	0.04441	6	AHI1,PDGFRB,HOXD11,PAX8,GLI3,PAX2
GO: Biological Process	GO:0001657	ureteric bud development	0.002574	0.04781	6	CER1,SLIT2,HOXD11,PAX8,GLI3,PAX2
GO: Biological Process	GO:0060349	bone morphogenesis	0.002574	0.04781	6	CER1,HOXD11,GLI3,COL1A1,COL9A1,COL27A1
GO: Biological Process	GO:0072164	mesonephric tubule development	0.002694	0.04891	6	CER1,SLIT2,HOXD11,PAX8,GLI3,PAX2
GO: Biological Process	GO:0072163	mesonephric epithelium development	0.002694	0.04891	6	CER1,SLIT2,HOXD11,PAX8,GLI3,PAX2
GO: Biological Process	GO:0001656	metanephros development	0.0002737	0.01271	7	PDGFRA,PDGFRB,SLIT2,HOXD11,PAX8,GLI3,PAX2
GO: Biological Process	GO:0035418	protein localization to synapse	0.0003895	0.01608	7	GRIPAP1,MAP1A,MAPK8IP3,HSPB1,KALRN,CEP112,MAPK10
GO: Biological Process	GO:0021510	spinal cord development	0.0006017	0.01999	7	SOX11,DRGX,DCC,PTPRS,GLI3,SOX6,PAX3
GO: Biological Process	GO:0042472	inner ear morphogenesis	0.0008143	0.02402	7	MYO3A,PAX8,PRRX1,COL11A1,ZEB1,SOBP,PAX2
GO: Biological Process	GO:0050773	regulation of dendrite development	0.001354	0.03354	7	DCC,COBL,EEF2K,KALRN,FAT3,NTRK2,CIT
GO: Biological Process	GO:0061387	regulation of extent of cell growth	0.001415	0.03409	7	DCC,SLIT2,PTPRS,SEMA3B,SEMA5A,APOE,CRABP2
GO: Biological Process	GO:0001841	neural tube formation	0.001477	0.03409	7	SOX11,DLC1,CC2D2A,COBL,SFRP5,PAX2,PAX3
GO: Biological Process	GO:0042471	ear morphogenesis	0.002141	0.04329	7	MYO3A,PAX8,PRRX1,COL11A1,ZEB1,SOBP,PAX2
GO: Biological Process	GO:1902414	protein localization to cell junction	0.0003611	0.01553	8	GRIPAP1,MAP1A,MAPK8IP3,HSPB1,KALRN,CEP112,CGNL1,MAPK10
GO: Biological Process	GO:0001838	embryonic epithelial tube formation	0.0007762	0.02367	8	SOX11,DLC1,PAX8,CC2D2A,COBL,SFRP5,PAX2,PAX3
GO: Biological Process	GO:0072073	kidney epithelium development	0.0008787	0.02456	8	AHI1,CER1,SLIT2,HOXD11,PAX8,GLI3,PODXL,PAX2
GO: Biological Process	GO:0072006	nephron development	0.00116	0.02963	8	AHI1,PDGFRA,PDGFRB,HOXD11,PAX8,GLI3,PODXL,PAX2
GO: Biological Process	GO:0010977	negative regulation of neuron projection development	0.00151	0.03409	8	DCC,SYNGAP1,SLIT2,PTPRS,SEMA3B,FAT3,SEMA5A,APOE
GO: Biological Process	GO:0051494	negative regulation of cytoskeleton organization	0.002077	0.04308	8	IQANK1,MAP1A,SPTBN5,SLIT2,DLC1,NAV3,BMERB1,CGNL1
GO: Biological Process	GO:0016331	morphogenesis of embryonic epithelium	0.002149	0.04329	8	SOX11,DLC1,PAX8,CC2D2A,COBL,SFRP5,PAX2,PAX3
GO: Biological Process	GO:0060041	retina development in camera-type eye	0.002377	0.04476	8	AHI1,PDGFRA,PDGFRB,C3,CDON,FAT3,NTRK2,PAX2
GO: Biological Process	GO:0048593	camera-type eye morphogenesis	0.0001389	0.008657	9	SOX11,AHI1,GLI3,CDON,ZEB1,FAT3,NTRK2,TENM3,PAX2
GO: Biological Process	GO:0072175	epithelial tube formation	0.0002789	0.0128	9	SOX11,DLC1,PAX8,CC2D2A,COBL,SFRP5,PODXL,PAX2,PAX3
GO: Biological Process	GO:0050768	negative regulation of neurogenesis	0.0003176	0.01381	9	SOX11,DCC,SYNGAP1,SLIT2,PTPRS,SEMA3B,SEMA5A,CIT,LDLR
GO: Biological Process	GO:0051961	negative regulation of nervous system development	0.0004085	0.01623	9	SOX11,DCC,SYNGAP1,SLIT2,PTPRS,SEMA3B,SEMA5A,CIT,LDLR
GO: Biological Process	GO:0007605	sensory perception of sound	0.0004431	0.01623	9	MAP1A,ADGRV1,MYO3A,KCNMA1,COL1A1,COL11A1,COL11A2,SOBP,PAX3
GO: Biological Process	GO:0035148	tube formation	0.0005404	0.01871	9	SOX11,DLC1,PAX8,CC2D2A,COBL,SFRP5,PODXL,PAX2,PAX3
GO: Biological Process	GO:0050770	regulation of axonogenesis	0.0007321	0.02284	9	DCC,SYNGAP1,SLIT2,PTPRS,SEMA3B,NTRK2,SEMA5A,APOE,CRABP2
GO: Biological Process	GO:0048754	branching morphogenesis of an epithelial tube	0.000817	0.02402	9	PDGFRA,ESR1,SLIT2,HOXD11,PAX8,GLI3,TNC,SEMA5A,PAX2
GO: Biological Process	GO:0010721	negative regulation of cell development	0.001825	0.03945	9	SOX11,DCC,SYNGAP1,SLIT2,PTPRS,SEMA3B,SEMA5A,CIT,LDLR
GO: Biological Process	GO:0010976	positive regulation of neuron projection development	0.001941	0.04135	9	AHI1,DCC,COBL,EEF2K,HSPB1,KALRN,NTRK2,APOE,TENM3
GO: Biological Process	GO:0031345	negative regulation of cell projection organization	0.002257	0.04329	9	DCC,SYNGAP1,SLIT2,PTPRS,SEMA3B,FAT3,SEMA5A,APOE,CIT
GO: Biological Process	GO:0061138	morphogenesis of a branching epithelium	0.002688	0.04891	9	PDGFRA,ESR1,SLIT2,HOXD11,PAX8,GLI3,TNC,SEMA5A,PAX2
GO: Biological Process	GO:0048704	embryonic skeletal system morphogenesis	1.008e-06	0.0003742	10	SOX11,PDGFRA,HOXA6,HOXD3,HOXD11,GLI3,PRRX1,COL11A1,ZEB1,DYNC2I1
GO: Biological Process	GO:0048592	eye morphogenesis	0.0001612	0.008781	10	SOX11,AHI1,GLI3,CDON,COL5A1,ZEB1,FAT3,NTRK2,TENM3,PAX2
GO: Biological Process	GO:0021915	neural tube development	0.000224	0.01064	10	SOX11,SSBP3,DLC1,GLI3,CC2D2A,COBL,SFRP5,GPR161,PAX2,PAX3
GO: Biological Process	GO:0050954	sensory perception of mechanical stimulus	0.0003694	0.01571	10	MAP1A,DRGX,ADGRV1,MYO3A,KCNMA1,COL1A1,COL11A1,COL11A2,SOBP,PAX3
GO: Biological Process	GO:0007601	visual perception	0.0006274	0.02042	10	RGS9,ADGRV1,MYO3A,COL1A1,COL11A1,SFRP5,SEMA5A,CEP250,GUCY2D,PAX2
GO: Biological Process	GO:0050953	sensory perception of light stimulus	0.0006937	0.02214	10	RGS9,ADGRV1,MYO3A,COL1A1,COL11A1,SFRP5,SEMA5A,CEP250,GUCY2D,PAX2
GO: Biological Process	GO:0050803	regulation of synapse structure or activity	0.002737	0.04948	10	GRIPAP1,ADGRB2,SYNGAP1,PTPRS,EEF2K,KALRN,NTRK2,SRCIN1,APOE,CBLN2
GO: Biological Process	GO:0048706	embryonic skeletal system development	1.845e-06	0.0005799	11	SOX11,PDGFRA,HOXA6,HOXD3,HOXD11,GLI3,COL1A1,PRRX1,COL11A1,ZEB1,DYNC2I1
GO: Biological Process	GO:1902904	negative regulation of supramolecular fiber organization	2.171e-05	0.002397	11	IQANK1,MAP1A,SPTBN5,SLIT2,DLC1,NAV3,BMERB1,APOE,EMILIN1,LDLR,CGNL1
GO: Biological Process	GO:0031032	actomyosin structure organization	0.0001006	0.008385	11	MYH3,PDGFRA,PDGFRB,DLC1,PPM1E,CIT,CCDC88A,PRKCQ,CGNL1,TNNT3,EPB41L2
GO: Biological Process	GO:0060560	developmental growth involved in morphogenesis	0.0008424	0.02456	11	ESR1,DCC,SLIT2,PTPRS,SEMA3B,COBL,SFRP5,TNC,SEMA5A,APOE,CRABP2
GO: Biological Process	GO:0007411	axon guidance	0.002145	0.04329	11	DRGX,DCC,GFRA1,MAPK8IP3,SPTBN5,SLIT2,GLI3,SEMA3B,KALRN,SEMA5A,PRKCQ
GO: Biological Process	GO:0097485	neuron projection guidance	0.002198	0.04329	11	DRGX,DCC,GFRA1,MAPK8IP3,SPTBN5,SLIT2,GLI3,SEMA3B,KALRN,SEMA5A,PRKCQ
GO: Biological Process	GO:0051216	cartilage development	2.602e-05	0.002711	12	CER1,HOXD3,HOXD11,GLI3,COL1A1,SOX6,COL9A1,PRRX1,COL11A1,COL11A2,ZEB1,COL27A1
GO: Biological Process	GO:0048839	inner ear development	3.096e-05	0.003012	12	AHI1,PDGFRB,ADGRV1,MYO3A,PAX8,GLI3,KCNMA1,PRRX1,COL11A1,ZEB1,SOBP,PAX2
GO: Biological Process	GO:0043583	ear development	9.81e-05	0.008351	12	AHI1,PDGFRB,ADGRV1,MYO3A,PAX8,GLI3,KCNMA1,PRRX1,COL11A1,ZEB1,SOBP,PAX2
GO: Biological Process	GO:0110053	regulation of actin filament organization	0.0003841	0.01601	12	IQANK1,SPTBN5,SLIT2,DLC1,PPM1E,SEMA5A,PLEKHG2,CIT,CCDC88A,KIRREL1,PRKCQ,CGNL1
GO: Biological Process	GO:0016358	dendrite development	0.0005459	0.01875	12	MAP1A,DCC,SYNGAP1,PTPRS,COBL,EEF2K,KALRN,FAT3,NTRK2,SRCIN1,APOE,CIT
GO: Biological Process	GO:0001822	kidney development	0.001445	0.03409	12	SOX11,AHI1,PDGFRA,PDGFRB,CER1,SLIT2,HOXD11,PAX8,GLI3,CC2D2A,PODXL,PAX2
GO: Biological Process	GO:0072001	renal system development	0.001965	0.04138	12	SOX11,AHI1,PDGFRA,PDGFRB,CER1,SLIT2,HOXD11,PAX8,GLI3,CC2D2A,PODXL,PAX2
GO: Biological Process	GO:0061448	connective tissue development	3.247e-05	0.003086	14	PDGFRB,CER1,HOXD3,HOXD11,GLI3,COL1A1,SOX6,COL5A1,COL9A1,PRRX1,COL11A1,COL11A2,ZEB1,COL27A1
GO: Biological Process	GO:0003002	regionalization	0.0004325	0.01623	14	AHI1,SSBP3,HOXA6,CER1,HOXD3,HOXD11,PAX8,GLI3,COBL,C3,CDON,GPR161,PAX2,PAX3
GO: Biological Process	GO:0043010	camera-type eye development	0.0004549	0.01623	14	SOX11,AHI1,PDGFRA,PDGFRB,GLI3,CC2D2A,C3,CDON,ZEB1,FAT3,NTRK2,TENM3,PAX2,MAB21L1
GO: Biological Process	GO:0001655	urogenital system development	0.0006112	0.02014	14	SOX11,AHI1,PDGFRA,PDGFRB,ESR1,CER1,SLIT2,HOXD11,PAX8,GLI3,CC2D2A,TNC,PODXL,PAX2
GO: Biological Process	GO:0044782	cilium organization	0.001805	0.03938	14	SPAG1,AHI1,CDKL1,CC2D2A,TSGA10IP,DNAH8,KIF27,DYNC2I1,CCDC57,CCDC88A,CEP89,CEP250,CEP131,CROCC
GO: Biological Process	GO:0001578	microtubule bundle formation	0.001957	0.04138	14	SPAG1,AHI1,CDKL1,CC2D2A,MTCL1,DNAH8,KIF27,DYNC2I1,CCDC57,CCDC88A,CEP89,CEP250,CEP131,CROCC
GO: Biological Process	GO:0090596	sensory organ morphogenesis	1.425e-05	0.00181	15	SOX11,AHI1,MYO3A,PAX8,GLI3,CDON,COL5A1,PRRX1,COL11A1,ZEB1,SOBP,FAT3,NTRK2,TENM3,PAX2
GO: Biological Process	GO:0048562	embryonic organ morphogenesis	2.869e-05	0.002859	15	SOX11,AHI1,PDGFRA,HOXA6,MYO3A,HOXD3,HOXD11,PAX8,GLI3,PRRX1,COL11A1,ZEB1,SOBP,DYNC2I1,PAX2
GO: Biological Process	GO:0032956	regulation of actin cytoskeleton organization	0.0001325	0.008657	15	IQANK1,PDGFRA,PDGFRB,SPTBN5,SLIT2,MYO3A,DLC1,PPM1E,SEMA5A,PLEKHG2,CIT,CCDC88A,KIRREL1,PRKCQ,CGNL1
GO: Biological Process	GO:0032535	regulation of cellular component size	0.0004222	0.01623	15	IQANK1,PPP1R15A,DCC,SPTBN5,SLIT2,MYO3A,PTPRS,SEMA3B,KCNMA1,SEMA5A,PLEKHG2,APOE,CRABP2,CIT,KIRREL1
GO: Biological Process	GO:0050767	regulation of neurogenesis	0.0005214	0.01821	15	SOX11,DCC,SYNGAP1,SLIT2,PTPRS,GLI3,SEMA3B,EEF2K,KALRN,NTRK2,SEMA5A,APOE,CRABP2,CIT,LDLR
GO: Biological Process	GO:0048199	vesicle targeting, to, from or within Golgi	0.001604	0.03582	15	SPAG1,AHI1,CDKL1,CC2D2A,DNAH8,COL7A1,KIF27,DYNC2I1,GRIA1,CCDC57,CCDC88A,CEP89,CEP250,CEP131,CROCC
GO: Biological Process	GO:0006903	vesicle targeting	0.002297	0.04385	15	SPAG1,AHI1,CDKL1,CC2D2A,DNAH8,COL7A1,KIF27,DYNC2I1,GRIA1,CCDC57,CCDC88A,CEP89,CEP250,CEP131,CROCC
GO: Biological Process	GO:0032970	regulation of actin filament-based process	0.0001499	0.008657	16	IQANK1,PDGFRA,PDGFRB,SPTBN5,SLIT2,MYO3A,DLC1,PPM1E,SEMA5A,PLEKHG2,CIT,CCDC88A,CTNNA3,KIRREL1,PRKCQ,CGNL1
GO: Biological Process	GO:0031346	positive regulation of cell projection organization	0.0001747	0.009391	16	AHI1,DCC,SLIT2,MYO3A,COBL,EEF2K,HSPB1,KALRN,NTRK2,SEMA5A,APOE,CRABP2,CCDC88A,TENM3,PRKCQ,CROCC
GO: Biological Process	GO:0099118	microtubule-based protein transport	0.000208	0.01035	16	SPAG1,AHI1,MAP1A,CDKL1,MAPK8IP3,CC2D2A,DNAH8,HSPB1,KIF27,DYNC2I1,CCDC57,CCDC88A,CEP89,CEP250,CEP131,CROCC
GO: Biological Process	GO:0098840	protein transport along microtubule	0.000208	0.01035	16	SPAG1,AHI1,MAP1A,CDKL1,MAPK8IP3,CC2D2A,DNAH8,HSPB1,KIF27,DYNC2I1,CCDC57,CCDC88A,CEP89,CEP250,CEP131,CROCC
GO: Biological Process	GO:0007015	actin filament organization	0.0002915	0.01303	16	TPM2,IQANK1,SPTBN5,SLIT2,DLC1,COBL,PPM1E,SEMA5A,PLEKHG2,CIT,CCDC88A,CTNNA3,KIRREL1,PRKCQ,CGNL1,SAMD14
GO: Biological Process	GO:0048705	skeletal system morphogenesis	2.793e-08	4.395e-05	17	SOX11,PDGFRA,PDGFRB,HOXA6,CER1,HOXD3,HOXD11,GLI3,COL1A1,SOX6,COL9A1,PRRX1,COL11A1,COL11A2,ZEB1,COL27A1,DYNC2I1
GO: Biological Process	GO:0060562	epithelial tube morphogenesis	1.725e-05	0.002014	17	SOX11,AHI1,PDGFRA,ESR1,SLIT2,DLC1,HOXD11,PAX8,GLI3,CC2D2A,COBL,SFRP5,TNC,PODXL,SEMA5A,PAX2,PAX3
GO: Biological Process	GO:0001654	eye development	5.244e-05	0.004761	17	SOX11,AHI1,PDGFRA,PDGFRB,MEIS3,MEIS2,GLI3,CC2D2A,C3,CDON,COL5A1,ZEB1,FAT3,NTRK2,TENM3,PAX2,MAB21L1
GO: Biological Process	GO:0150063	visual system development	5.693e-05	0.005056	17	SOX11,AHI1,PDGFRA,PDGFRB,MEIS3,MEIS2,GLI3,CC2D2A,C3,CDON,COL5A1,ZEB1,FAT3,NTRK2,TENM3,PAX2,MAB21L1
GO: Biological Process	GO:0048880	sensory system development	6.693e-05	0.005819	17	SOX11,AHI1,PDGFRA,PDGFRB,MEIS3,MEIS2,GLI3,CC2D2A,C3,CDON,COL5A1,ZEB1,FAT3,NTRK2,TENM3,PAX2,MAB21L1
GO: Biological Process	GO:0010970	transport along microtubule	0.0005963	0.01997	17	SPAG1,AHI1,MAP1A,CDKL1,MAPK8IP3,UCHL1,CC2D2A,DNAH8,HSPB1,KIF27,DYNC2I1,CCDC57,CCDC88A,CEP89,CEP250,CEP131,CROCC
GO: Biological Process	GO:0099111	microtubule-based transport	0.000787	0.02382	17	SPAG1,AHI1,MAP1A,CDKL1,MAPK8IP3,UCHL1,CC2D2A,DNAH8,HSPB1,KIF27,DYNC2I1,CCDC57,CCDC88A,CEP89,CEP250,CEP131,CROCC
GO: Biological Process	GO:0030705	cytoskeleton-dependent intracellular transport	0.001149	0.02954	17	SPAG1,AHI1,MAP1A,CDKL1,MAPK8IP3,UCHL1,CC2D2A,DNAH8,HSPB1,KIF27,DYNC2I1,CCDC57,CCDC88A,CEP89,CEP250,CEP131,CROCC
GO: Biological Process	GO:0060284	regulation of cell development	0.001559	0.035	17	SOX11,DCC,SYNGAP1,BNC1,SLIT2,HOXD11,PTPRS,GLI3,SEMA3B,EEF2K,KALRN,NTRK2,SEMA5A,APOE,CRABP2,CIT,LDLR
GO: Biological Process	GO:1902903	regulation of supramolecular fiber organization	4.598e-06	0.000854	18	IQANK1,MAP1A,SPTBN5,SLIT2,DLC1,NAV3,PPM1E,BMERB1,SEMA5A,PLEKHG2,APOE,CIT,EMILIN1,LDLR,CCDC88A,KIRREL1,PRKCQ,CGNL1
GO: Biological Process	GO:0051960	regulation of nervous system development	0.0001905	0.009731	18	SOX11,ADGRB2,DCC,SYNGAP1,SLIT2,PTPRS,GLI3,SEMA3B,EEF2K,MYRF,KALRN,NTRK2,SEMA5A,APOE,CRABP2,CIT,LDLR,CBLN2
GO: Biological Process	GO:0051493	regulation of cytoskeleton organization	0.0003004	0.0132	18	IQANK1,MAP1A,PDGFRA,PDGFRB,SPTBN5,SLIT2,MYO3A,DLC1,NAV3,PPM1E,BMERB1,SEMA5A,PLEKHG2,CIT,CCDC88A,KIRREL1,PRKCQ,CGNL1
GO: Biological Process	GO:0001501	skeletal system development	0.0004011	0.01623	18	SOX11,PDGFRA,PDGFRB,HOXA6,CER1,HOXD3,HOXD11,GLI3,COL1A1,SOX6,COL9A1,COL9A2,PRRX1,COL11A1,COL11A2,ZEB1,COL27A1,DYNC2I1
GO: Biological Process	GO:0002009	morphogenesis of an epithelium	0.001943	0.04135	18	SOX11,AHI1,PDGFRA,ESR1,SLIT2,DLC1,HOXD11,PAX8,GLI3,CC2D2A,COBL,COL5A1,SFRP5,TNC,PODXL,SEMA5A,PAX2,PAX3
GO: Biological Process	GO:0030198	extracellular matrix organization	2.179e-06	0.0005905	19	PRSS2,PDGFRA,ADAMTS15,COL1A1,COL5A1,COL6A3,COL7A1,COL9A1,COL9A2,COL11A1,COL11A2,COL16A1,ADAMTS3,TNC,OLFML2B,COL27A1,SEMA5A,EMILIN1,COL23A1
GO: Biological Process	GO:0043062	extracellular structure organization	2.254e-06	0.0005905	19	PRSS2,PDGFRA,ADAMTS15,COL1A1,COL5A1,COL6A3,COL7A1,COL9A1,COL9A2,COL11A1,COL11A2,COL16A1,ADAMTS3,TNC,OLFML2B,COL27A1,SEMA5A,EMILIN1,COL23A1
GO: Biological Process	GO:0045229	external encapsulating structure organization	2.411e-06	0.0005905	19	PRSS2,PDGFRA,ADAMTS15,COL1A1,COL5A1,COL6A3,COL7A1,COL9A1,COL9A2,COL11A1,COL11A2,COL16A1,ADAMTS3,TNC,OLFML2B,COL27A1,SEMA5A,EMILIN1,COL23A1
GO: Biological Process	GO:0031503	protein-containing complex localization	0.001436	0.03409	19	GRIPAP1,SPAG1,AHI1,UPF3B,CDKL1,CC2D2A,DNAH8,KIF27,KALRN,DYNC2I1,CCDC57,AKAP8L,CCDC88A,CEP89,CEP112,CEP250,CEP131,CROCC,MAPK10
GO: Biological Process	GO:0007389	pattern specification process	6.068e-06	0.001007	20	AHI1,MEIS3,BCOR,SSBP3,MEIS2,SYNGAP1,HOXA6,CER1,HOXD3,HOXD11,PAX8,GLI3,CC2D2A,COBL,C3,CDON,ZEB1,GPR161,PAX2,PAX3
GO: Biological Process	GO:0048568	embryonic organ development	1.101e-05	0.001537	20	SOX11,AHI1,PDGFRA,PDGFRB,HOXA6,MYO3A,HOXD3,HOXD11,PAX8,GLI3,HS6ST1,CC2D2A,COBL,PRRX1,COL11A1,ZEB1,SOBP,DYNC2I1,ZFPM2,PAX2
GO: Biological Process	GO:0007409	axonogenesis	2.145e-05	0.002397	20	MAP1A,DRGX,DCC,GFRA1,MAPK8IP3,SYNGAP1,SPTBN5,SLIT2,PTPRS,GLI3,UCHL1,SEMA3B,COBL,KALRN,NTRK2,SEMA5A,APOE,CRABP2,PAX2,PRKCQ
GO: Biological Process	GO:0007018	microtubule-based movement	0.0005671	0.01931	20	SPAG1,AHI1,MAP1A,CDKL1,MAPK8IP3,UCHL1,CC2D2A,DNAH8,HSPB1,KIF27,DYNC2I1,CCDC57,KIFC2,KIF7,CCDC88A,DNAH12,CEP89,CEP250,CEP131,CROCC
GO: Biological Process	GO:0120031	plasma membrane bounded cell projection assembly	0.001307	0.03257	20	SPAG1,AHI1,PDGFRB,CDKL1,SLIT2,MYO3A,DLC1,CC2D2A,COBL,DNAH8,KIF27,PODXL,DYNC2I1,CCDC57,CCDC88A,CEP89,CEP250,CEP131,PRKCQ,CROCC
GO: Biological Process	GO:0061061	muscle structure development	0.001307	0.03257	20	SOX11,MYH3,PDGFRA,PDGFRB,SPEG,NR4A1,UCHL1,C3,FHL1,CDON,SOX6,COL6A3,FLNC,COL11A1,ZEB1,ZFPM2,ATF3,PAX3,TNNT3,ALPK2
GO: Biological Process	GO:0030031	cell projection assembly	0.001675	0.03699	20	SPAG1,AHI1,PDGFRB,CDKL1,SLIT2,MYO3A,DLC1,CC2D2A,COBL,DNAH8,KIF27,PODXL,DYNC2I1,CCDC57,CCDC88A,CEP89,CEP250,CEP131,PRKCQ,CROCC
GO: Biological Process	GO:0010975	regulation of neuron projection development	7.495e-06	0.001178	21	AHI1,DCC,SYNGAP1,SLIT2,PTPRS,SEMA3B,COBL,EEF2K,HSPB1,ACAP3,PRRX1,KALRN,FAT3,NTRK2,SEMA5A,SRCIN1,APOE,CRABP2,CIT,CCDC88A,TENM3
GO: Biological Process	GO:0061564	axon development	2.388e-05	0.002568	21	MAP1A,DRGX,DCC,GFRA1,MAPK8IP3,SYNGAP1,SPTBN5,SLIT2,PTPRS,GLI3,UCHL1,SEMA3B,COBL,KALRN,TNC,NTRK2,SEMA5A,APOE,CRABP2,PAX2,PRKCQ
GO: Biological Process	GO:0007507	heart development	0.0001889	0.009731	21	SOX11,AHI1,PDGFRA,PDGFRB,SPEG,BCOR,CDKL1,CER1,SLIT2,DLC1,PAX8,GLI3,CC2D2A,SOX6,COL5A1,COL11A1,EMILIN1,ZFPM2,KIF7,PAX3,ALPK2
GO: Biological Process	GO:0051129	negative regulation of cellular component organization	0.002074	0.04308	21	IQANK1,MAP1A,ESR1,DCC,BCOR,SYNGAP1,SPTBN5,SLIT2,DLC1,PTPRS,SEMA3B,NAV3,DNAJB1,FAT3,BMERB1,SEMA5A,APOE,CIT,EMILIN1,LDLR,CGNL1
GO: Biological Process	GO:0001568	blood vessel development	0.001294	0.03257	22	PDGFRA,PDGFRB,ADGRB2,NR4A1,SLIT2,GLI3,HS6ST1,C3,AMOTL2,HSPB1,COL1A1,JCAD,COL5A1,PRRX1,NTRK2,SEMA5A,APOE,EMILIN1,LDLR,ZFPM2,KIF7,HSPB6
GO: Biological Process	GO:0048729	tissue morphogenesis	0.001453	0.03409	22	SOX11,AHI1,PDGFRA,ESR1,CER1,SLIT2,DLC1,HOXD11,PAX8,GLI3,CC2D2A,COBL,COL5A1,COL7A1,COL11A1,SFRP5,TNC,PODXL,SEMA5A,ZFPM2,PAX2,PAX3
GO: Biological Process	GO:0001944	vasculature development	0.00218	0.04329	22	PDGFRA,PDGFRB,ADGRB2,NR4A1,SLIT2,GLI3,HS6ST1,C3,AMOTL2,HSPB1,COL1A1,JCAD,COL5A1,PRRX1,NTRK2,SEMA5A,APOE,EMILIN1,LDLR,ZFPM2,KIF7,HSPB6
GO: Biological Process	GO:0048812	neuron projection morphogenesis	0.0001036	0.008464	23	MAP1A,DRGX,DCC,GFRA1,MAPK8IP3,SYNGAP1,SPTBN5,SLIT2,PTPRS,GLI3,UCHL1,SEMA3B,COBL,EEF2K,KALRN,NTRK2,SEMA5A,SRCIN1,APOE,CRABP2,CIT,PAX2,PRKCQ
GO: Biological Process	GO:0120039	plasma membrane bounded cell projection morphogenesis	0.0001376	0.008657	23	MAP1A,DRGX,DCC,GFRA1,MAPK8IP3,SYNGAP1,SPTBN5,SLIT2,PTPRS,GLI3,UCHL1,SEMA3B,COBL,EEF2K,KALRN,NTRK2,SEMA5A,SRCIN1,APOE,CRABP2,CIT,PAX2,PRKCQ
GO: Biological Process	GO:0048858	cell projection morphogenesis	0.0001509	0.008657	23	MAP1A,DRGX,DCC,GFRA1,MAPK8IP3,SYNGAP1,SPTBN5,SLIT2,PTPRS,GLI3,UCHL1,SEMA3B,COBL,EEF2K,KALRN,NTRK2,SEMA5A,SRCIN1,APOE,CRABP2,CIT,PAX2,PRKCQ
GO: Biological Process	GO:0032990	cell part morphogenesis	0.0002128	0.01035	23	MAP1A,DRGX,DCC,GFRA1,MAPK8IP3,SYNGAP1,SPTBN5,SLIT2,PTPRS,GLI3,UCHL1,SEMA3B,COBL,EEF2K,KALRN,NTRK2,SEMA5A,SRCIN1,APOE,CRABP2,CIT,PAX2,PRKCQ
GO: Biological Process	GO:0048589	developmental growth	0.0002407	0.01131	23	EPPK1,PDGFRA,PDGFRB,ESR1,DCC,CER1,SLIT2,HOXD11,PTPRS,GLI3,SEMA3B,COBL,C3,COL9A1,SFRP5,SGIP1,ATN1,TNC,COL27A1,SEMA5A,APOE,CRABP2,ZFPM2
GO: Biological Process	GO:0007423	sensory organ development	3.717e-06	0.0007593	24	SOX11,AHI1,PDGFRA,PDGFRB,MEIS3,ADGRV1,MEIS2,MYO3A,PAX8,GLI3,KCNMA1,CC2D2A,C3,CDON,COL5A1,PRRX1,COL11A1,ZEB1,SOBP,FAT3,NTRK2,TENM3,PAX2,MAB21L1
GO: Biological Process	GO:0048667	cell morphogenesis involved in neuron differentiation	1.132e-05	0.001537	24	MAP1A,DRGX,DCC,GFRA1,MAPK8IP3,SYNGAP1,SPTBN5,SLIT2,MYO3A,PTPRS,GLI3,UCHL1,SEMA3B,COBL,EEF2K,KALRN,NTRK2,SEMA5A,SRCIN1,APOE,CRABP2,CIT,PAX2,PRKCQ
GO: Biological Process	GO:0030036	actin cytoskeleton organization	3.598e-05	0.003341	24	TPM2,IQANK1,MYH3,PDGFRA,PDGFRB,SPTBN5,SLIT2,MYO3A,DLC1,COBL,AMOTL2,PPM1E,SEMA5A,PLEKHG2,THSD7B,CIT,CCDC88A,CTNNA3,KIRREL1,PRKCQ,CGNL1,SAMD14,TNNT3,EPB41L2
GO: Biological Process	GO:0000904	cell morphogenesis involved in differentiation	0.0001331	0.008657	25	MAP1A,DRGX,DCC,GFRA1,MAPK8IP3,SYNGAP1,SPTBN5,SLIT2,MYO3A,PTPRS,GLI3,UCHL1,SEMA3B,COBL,EEF2K,KALRN,FAT3,NTRK2,SEMA5A,SRCIN1,APOE,CRABP2,CIT,PAX2,PRKCQ
GO: Biological Process	GO:0048598	embryonic morphogenesis	7.705e-07	0.0003498	26	SOX11,MYH3,AHI1,PDGFRA,HOXA6,CER1,MYO3A,DLC1,HOXD3,HOXD11,PAX8,GLI3,CC2D2A,COBL,CDON,COL5A1,COL7A1,PRRX1,COL11A1,ZEB1,SFRP5,SOBP,DYNC2I1,CRABP2,PAX2,PAX3
GO: Biological Process	GO:0120035	regulation of plasma membrane bounded cell projection organization	5.677e-06	0.001007	26	AHI1,DCC,CDKL1,SYNGAP1,SLIT2,MYO3A,PTPRS,SEMA3B,COBL,EEF2K,HSPB1,ACAP3,PRRX1,KALRN,PODXL,FAT3,NTRK2,SEMA5A,SRCIN1,APOE,CRABP2,CIT,CCDC88A,TENM3,PRKCQ,CROCC
GO: Biological Process	GO:0031344	regulation of cell projection organization	8.487e-06	0.001284	26	AHI1,DCC,CDKL1,SYNGAP1,SLIT2,MYO3A,PTPRS,SEMA3B,COBL,EEF2K,HSPB1,ACAP3,PRRX1,KALRN,PODXL,FAT3,NTRK2,SEMA5A,SRCIN1,APOE,CRABP2,CIT,CCDC88A,TENM3,PRKCQ,CROCC
GO: Biological Process	GO:0044087	regulation of cellular component biogenesis	0.00111	0.02925	26	IQANK1,ESR1,ADGRB2,CDKL1,SPTBN5,SLIT2,MYO3A,DLC1,PTPRS,NAV3,COBL,EEF2K,DNAJB1,COL16A1,PODXL,NTRK2,PPM1E,PLEKHG2,APOE,EMILIN1,CCDC88A,CBLN2,KIRREL1,PRKCQ,CGNL1,CROCC
GO: Biological Process	GO:0030029	actin filament-based process	1.553e-05	0.001867	27	TPM2,IQANK1,MYH3,PDGFRA,PDGFRB,SPTBN5,SLIT2,MYO3A,KCNE4,DLC1,KCNN2,COBL,AMOTL2,FLNC,PPM1E,SEMA5A,PLEKHG2,THSD7B,CIT,CCDC88A,CTNNA3,KIRREL1,PRKCQ,CGNL1,SAMD14,TNNT3,EPB41L2
GO: Biological Process	GO:0032989	cellular component morphogenesis	1.124e-05	0.001537	28	MYH3,MAP1A,PDGFRA,PDGFRB,DRGX,DCC,GFRA1,MAPK8IP3,SYNGAP1,SPTBN5,SLIT2,PTPRS,GLI3,UCHL1,SEMA3B,COBL,EEF2K,CCDC136,KALRN,NTRK2,SEMA5A,SRCIN1,APOE,CRABP2,CIT,PAX2,PRKCQ,TNNT3
GO: Biological Process	GO:0040007	growth	0.0007474	0.02296	28	PRSS2,AHI1,EPPK1,PDGFRA,PDGFRB,ESR1,RRAD,DCC,CER1,SLIT2,HOXD11,PTPRS,GLI3,SEMA3B,COBL,C3,FHL1,COL9A1,SFRP5,SGIP1,ATN1,TNC,COL27A1,SEMA5A,APOE,CRABP2,ZFPM2,PRKCQ
GO: Biological Process	GO:0007417	central nervous system development	0.0007474	0.02296	28	SOX11,AHI1,DRGX,MEIS3,DCC,SSBP3,MEIS2,MAPK8IP3,SLIT2,DLC1,PAX8,PTPRS,GLI3,C3,MYRF,CDON,SOX6,DNAJB1,ZEB1,ATN1,KIF27,KALRN,NTRK2,BMERB1,SEMA5A,LDLR,PAX2,PAX3
GO: Biological Process	GO:0000902	cell morphogenesis	0.00103	0.0275	28	MAP1A,DRGX,DCC,GFRA1,MAPK8IP3,SYNGAP1,SPTBN5,SLIT2,MYO3A,DLC1,PTPRS,GLI3,UCHL1,SEMA3B,COBL,EEF2K,SOX6,KALRN,FAT3,NTRK2,SEMA5A,SRCIN1,APOE,CRABP2,CIT,PAX2,PRKCQ,EPB41L2
GO: Biological Process	GO:0043009	chordate embryonic development	5.404e-07	0.0003155	29	SOX11,PDGFRA,PDGFRB,SPEG,TENT5C,BCOR,SSBP3,MAPK8IP3,HOXA6,SLIT2,DLC1,HOXD3,HOXD11,GLI3,HS6ST1,CC2D2A,COBL,COL1A1,SOX6,PRRX1,COL11A1,ZEB1,SFRP5,ADAMTS3,DYNC2I1,ZFPM2,GPR161,PAX2,PAX3
GO: Biological Process	GO:0009792	embryo development ending in birth or egg hatching	9.422e-07	0.0003742	29	SOX11,PDGFRA,PDGFRB,SPEG,TENT5C,BCOR,SSBP3,MAPK8IP3,HOXA6,SLIT2,DLC1,HOXD3,HOXD11,GLI3,HS6ST1,CC2D2A,COBL,COL1A1,SOX6,PRRX1,COL11A1,ZEB1,SFRP5,ADAMTS3,DYNC2I1,ZFPM2,GPR161,PAX2,PAX3
GO: Biological Process	GO:0051093	negative regulation of developmental process	0.0001175	0.008657	29	SOX11,ADGRB2,ADGRV1,DCC,BCOR,MEIS2,SYNGAP1,CER1,SLIT2,H4C1,PAX8,PTPRS,GLI3,SEMA3B,HSPB1,SOX6,COL5A1,ZEB1,SFRP5,FAT3,SEMA5A,APOE,RUNX1T1,CIT,EMILIN1,LDLR,ZFPM2,PAX2,ALPK2
GO: Biological Process	GO:0022603	regulation of anatomical structure morphogenesis	0.0002877	0.01303	29	AHI1,PDGFRA,ESR1,ADGRB2,DCC,SYNGAP1,SLIT2,DLC1,HOXD11,PAX8,PTPRS,SEMA3B,C3,EEF2K,HSPB1,JCAD,SFRP5,KALRN,NTRK2,SEMA5A,SRCIN1,APOE,CRABP2,CIT,EMILIN1,HSPB6,PAX2,PAX3,EPB41L2
GO: Biological Process	GO:0051130	positive regulation of cellular component organization	0.001803	0.03938	29	AHI1,PDGFRB,ESR1,ADGRB2,PPP1R15A,DCC,SLIT2,MYO3A,NAV3,COBL,C3,EEF2K,HSPB1,SGIP1,COL16A1,KALRN,NTRK2,PPM1E,SEMA5A,APOE,CRABP2,EMILIN1,AKAP8L,CCDC88A,TENM3,CBLN2,KIRREL1,PRKCQ,CROCC
GO: Biological Process	GO:0051094	positive regulation of developmental process	0.002624	0.04829	32	SOX11,AHI1,PDGFRA,ADGRB2,ADGRV1,SSBP3,MAPK8IP3,BNC1,SLIT2,HOXD3,HOXD11,PAX8,GLI3,COBL,C3,EEF2K,HSPB1,CDON,COL1A1,SOX6,JCAD,ZEB1,SGIP1,KALRN,NTRK2,SEMA5A,APOE,CRABP2,ZFPM2,CBLN2,HSPB6,PAX2
GO: Biological Process	GO:0035239	tube morphogenesis	1.433e-06	0.0004878	33	SOX11,AHI1,PDGFRA,PDGFRB,ESR1,ADGRB2,NR4A1,SLIT2,DLC1,HOXD11,PAX8,GLI3,HS6ST1,CC2D2A,COBL,C3,AMOTL2,HSPB1,JCAD,PRRX1,ZEB1,SFRP5,TNC,PODXL,NTRK2,SEMA5A,APOE,EMILIN1,LDLR,ZFPM2,HSPB6,PAX2,PAX3
GO: Biological Process	GO:0060429	epithelium development	0.001473	0.03409	33	SOX11,AHI1,EPPK1,PDGFRA,ESR1,EVPL,SSBP3,CER1,SLIT2,MYO3A,DLC1,HOXD11,PAX8,PTPRS,GLI3,KCNMA1,PKP1,CC2D2A,COBL,C3,COL5A1,ZEB1,SFRP5,KRT15,KRT18,TNC,PODXL,FOSL2,SEMA5A,GPR161,SAFB2,PAX2,PAX3
GO: Biological Process	GO:0097435	supramolecular fiber organization	3.314e-10	1.354e-06	34	TPM2,IQANK1,MYH3,EPPK1,MAP1A,PDGFRA,PDGFRB,SPTBN5,SLIT2,DLC1,NAV3,PKP1,COBL,COL1A1,COL5A1,COL11A1,COL11A2,ADAMTS3,PPM1E,BMERB1,SEMA5A,PLEKHG2,APOE,CCDC57,CIT,EMILIN1,LDLR,CCDC88A,CTNNA3,KIRREL1,PRKCQ,CGNL1,SAMD14,TNNT3
GO: Biological Process	GO:0031175	neuron projection development	6.162e-06	0.001007	34	AHI1,MAP1A,DRGX,ADGRV1,DCC,GFRA1,MAPK8IP3,SYNGAP1,SPTBN5,SLIT2,MYO3A,PTPRS,GLI3,UCHL1,SEMA3B,COBL,EEF2K,HSPB1,ACAP3,PRRX1,KALRN,TNC,FAT3,NTRK2,SEMA5A,SRCIN1,APOE,CRABP2,CIT,CCDC88A,TENM3,PAX2,PRKCQ,SAMD14
GO: Biological Process	GO:0007155	cell adhesion	0.001149	0.02954	34	PRSS2,PDGFRA,MPDZ,CLDN15,ADGRV1,SLIT2,DLC1,HOXD3,PTPRS,GLI3,PKP1,HSPB1,CDON,COL1A1,JCAD,COL5A1,COL6A3,COL7A1,COL16A1,KRT18,TNC,PODXL,FAT3,SEMA5A,SRCIN1,CBLB,EDIL3,EMILIN1,TENM3,CTNNA3,KIRREL1,PRKCQ,PCDH7,MSLN
GO: Biological Process	GO:0022610	biological adhesion	0.001239	0.03145	34	PRSS2,PDGFRA,MPDZ,CLDN15,ADGRV1,SLIT2,DLC1,HOXD3,PTPRS,GLI3,PKP1,HSPB1,CDON,COL1A1,JCAD,COL5A1,COL6A3,COL7A1,COL16A1,KRT18,TNC,PODXL,FAT3,SEMA5A,SRCIN1,CBLB,EDIL3,EMILIN1,TENM3,CTNNA3,KIRREL1,PRKCQ,PCDH7,MSLN
GO: Biological Process	GO:0072359	circulatory system development	2.654e-05	0.002711	35	SOX11,AHI1,PDGFRA,PDGFRB,SPEG,ADGRB2,NR4A1,BCOR,CDKL1,CER1,SLIT2,DLC1,PAX8,GLI3,HS6ST1,CC2D2A,C3,AMOTL2,HSPB1,COL1A1,SOX6,JCAD,COL5A1,PRRX1,COL11A1,NTRK2,SEMA5A,APOE,EMILIN1,LDLR,ZFPM2,KIF7,HSPB6,PAX3,ALPK2
GO: Biological Process	GO:0048666	neuron development	1.462e-05	0.00181	36	AHI1,MAP1A,DRGX,ADGRV1,DCC,GFRA1,MAPK8IP3,SYNGAP1,SPTBN5,SLIT2,MYO3A,PTPRS,GLI3,UCHL1,HS6ST1,SEMA3B,COBL,C3,EEF2K,HSPB1,ACAP3,PRRX1,KALRN,TNC,FAT3,NTRK2,SEMA5A,SRCIN1,APOE,CRABP2,CIT,CCDC88A,TENM3,PAX2,PRKCQ,SAMD14
GO: Biological Process	GO:2000026	regulation of multicellular organismal development	0.0005766	0.01947	36	SOX11,AHI1,EPPK1,ADGRB2,ADGRV1,DCC,BCOR,MEIS2,SYNGAP1,SLIT2,HOXD11,H4C1,PAX8,PTPRS,GLI3,SEMA3B,C3,EEF2K,MYRF,HSPB1,SOX6,JCAD,ZEB1,KALRN,NTRK2,SEMA5A,APOE,CRABP2,CIT,EMILIN1,LDLR,ZFPM2,CBLN2,HSPB6,PAX2,PRKCQ
GO: Biological Process	GO:0035295	tube development	2.601e-06	0.0005905	37	SOX11,AHI1,PDGFRA,PDGFRB,ESR1,ADGRB2,NR4A1,SSBP3,MAPK8IP3,CER1,SLIT2,DLC1,HOXD11,PAX8,GLI3,HS6ST1,CC2D2A,COBL,C3,AMOTL2,HSPB1,JCAD,PRRX1,ZEB1,SFRP5,TNC,PODXL,NTRK2,SEMA5A,APOE,EMILIN1,LDLR,ZFPM2,GPR161,HSPB6,PAX2,PAX3
GO: Biological Process	GO:0048646	anatomical structure formation involved in morphogenesis	4.384e-06	0.0008531	38	SOX11,MYH3,AHI1,PDGFRA,PDGFRB,ADGRB2,NR4A1,SSBP3,CER1,SLIT2,DLC1,HOXD11,PAX8,GLI3,HS6ST1,CC2D2A,COBL,C3,AMOTL2,CCDC136,HSPB1,CDON,COL1A1,JCAD,COL5A1,COL7A1,COL11A1,SFRP5,PODXL,FAT3,BMERB1,SEMA5A,EMILIN1,ZFPM2,HSPB6,PAX2,PAX3,TNNT3
GO: Biological Process	GO:0010941	regulation of cell death	0.002151	0.04329	39	SOX11,PDE1A,AHI1,PDGFRB,ESR1,APBB3,MEIS3,NR4A1,DCC,ADCYAP1R1,SYNGAP1,SLIT2,DLC1,HYPK,PAX8,GLI3,KCNMA1,PYCR1,EEF2K,BEX2,HSPB1,TRIM2,KRT18,UACA,KALRN,NTRK2,SEMA5A,GRIK5,PLEKHG2,APOE,SIRT5,ZFPM2,NRBP2,GIMAP8,HSPB6,ATF3,PAX2,PRKCQ,ALPK2
GO: Biological Process	GO:0009887	animal organ morphogenesis	4.86e-08	4.395e-05	40	SOX11,AHI1,PDGFRA,PDGFRB,ESR1,MEIS3,BCOR,MEIS2,MAPK8IP3,HOXA6,CER1,SLIT2,MYO3A,DLC1,HOXD3,HOXD11,PAX8,GLI3,FHL1,CDON,COL1A1,SOX6,COL5A1,COL9A1,PRRX1,COL11A1,COL11A2,ZEB1,SFRP5,TNC,SOBP,FAT3,NTRK2,COL27A1,DYNC2I1,ZFPM2,TENM3,PAX2,PAX3,ALPK2
GO: Biological Process	GO:0009790	embryo development	5.055e-08	4.395e-05	41	SOX11,MYH3,AHI1,PDGFRA,PDGFRB,SPEG,TENT5C,MEIS3,BCOR,SSBP3,MEIS2,MAPK8IP3,HOXA6,CER1,SLIT2,MYO3A,DLC1,HOXD3,HOXD11,PAX8,GLI3,HS6ST1,CC2D2A,COBL,CDON,COL1A1,SOX6,COL5A1,COL7A1,PRRX1,COL11A1,ZEB1,SFRP5,ADAMTS3,SOBP,DYNC2I1,CRABP2,ZFPM2,GPR161,PAX2,PAX3
GO: Biological Process	GO:0030182	neuron differentiation	2.472e-06	0.0005905	43	SOX11,AHI1,MAP1A,DRGX,ADGRV1,DCC,GFRA1,MAPK8IP3,SYNGAP1,SPTBN5,SLIT2,MYO3A,HOXD3,PTPRS,GLI3,UCHL1,HS6ST1,SEMA3B,KCNMA1,COBL,C3,EEF2K,HSPB1,ACAP3,CDON,PRRX1,ZEB1,KALRN,TNC,FAT3,NTRK2,SEMA5A,SRCIN1,APOE,CRABP2,CIT,NRBP2,CCDC88A,TENM3,PAX2,PRKCQ,PAX3,SAMD14
GO: Biological Process	GO:0048699	generation of neurons	1.166e-05	0.001537	44	SOX11,AHI1,MAP1A,DRGX,ADGRV1,DCC,GFRA1,MAPK8IP3,SYNGAP1,SPTBN5,SLIT2,MYO3A,HOXD3,PTPRS,GLI3,UCHL1,HS6ST1,SEMA3B,KCNMA1,COBL,C3,EEF2K,HSPB1,ACAP3,CDON,PRRX1,ZEB1,KALRN,TNC,FAT3,NTRK2,SEMA5A,SRCIN1,APOE,CRABP2,CIT,LDLR,NRBP2,CCDC88A,TENM3,PAX2,PRKCQ,PAX3,SAMD14
GO: Biological Process	GO:0022008	neurogenesis	2.988e-06	0.0006426	48	SOX11,AHI1,MAP1A,DRGX,ADGRV1,DCC,GFRA1,MAPK8IP3,SYNGAP1,SPTBN5,SLIT2,MYO3A,HOXD3,PTPRS,GLI3,UCHL1,HS6ST1,SEMA3B,KCNMA1,NAV3,COBL,C3,EEF2K,MYRF,HSPB1,ACAP3,CDON,SOX6,PRRX1,ZEB1,KALRN,TNC,FAT3,NTRK2,BMERB1,SEMA5A,SRCIN1,APOE,CRABP2,CIT,LDLR,NRBP2,CCDC88A,TENM3,PAX2,PRKCQ,PAX3,SAMD14
GO: Biological Process	GO:0007010	cytoskeleton organization	5.378e-08	4.395e-05	49	TPM2,IQANK1,MYH3,SPAG1,AHI1,EPPK1,MAP1A,PDGFRA,PDGFRB,EVPL,CNTLN,CDKL1,SPTBN5,SLIT2,MYO3A,DLC1,NAV3,PKP1,CC2D2A,COBL,MTCL1,AMOTL2,DNAH8,KRT15,KIF27,KRT18,PPM1E,BMERB1,DYNC2I1,SEMA5A,PLEKHG2,THSD7B,APOE,CCDC57,CIT,KIFC2,CCDC88A,CEP89,CEP250,CTNNA3,KIRREL1,CEP131,PRKCQ,CGNL1,CROCC,SAMD14,TNNT3,EPB41L2,PRPH
GO: Biological Process	GO:0120036	plasma membrane bounded cell projection organization	3.921e-07	0.000267	49	SPAG1,AHI1,MAP1A,PDGFRB,DRGX,ADGRV1,DCC,CDKL1,GFRA1,MAPK8IP3,SYNGAP1,SPTBN5,SLIT2,MYO3A,DLC1,PTPRS,GLI3,UCHL1,SEMA3B,CC2D2A,COBL,EEF2K,TSGA10IP,DNAH8,HSPB1,ACAP3,PRRX1,KIF27,KALRN,TNC,PODXL,FAT3,NTRK2,DYNC2I1,SEMA5A,SRCIN1,APOE,CCDC57,CRABP2,CIT,CCDC88A,TENM3,CEP89,CEP250,CEP131,PAX2,PRKCQ,CROCC,SAMD14
GO: Biological Process	GO:0030030	cell projection organization	7.437e-07	0.0003498	49	SPAG1,AHI1,MAP1A,PDGFRB,DRGX,ADGRV1,DCC,CDKL1,GFRA1,MAPK8IP3,SYNGAP1,SPTBN5,SLIT2,MYO3A,DLC1,PTPRS,GLI3,UCHL1,SEMA3B,CC2D2A,COBL,EEF2K,TSGA10IP,DNAH8,HSPB1,ACAP3,PRRX1,KIF27,KALRN,TNC,PODXL,FAT3,NTRK2,DYNC2I1,SEMA5A,SRCIN1,APOE,CCDC57,CRABP2,CIT,CCDC88A,TENM3,CEP89,CEP250,CEP131,PAX2,PRKCQ,CROCC,SAMD14

## Sheet: Upregulated Pathways
S21. ToppGene pathway output for genes with increased expression levels in Male embryos from IVP compared to AI on d32
Category	ID	Name	Source	p-value	q-value FDR B&H	Hit Count in Query List	Hit in Query List
Pathway	M3005	Genes encoding collagen proteins	MSigDB C2 BIOCARTA (v7.3)	1.363e-11	7.467e-09	11	COL1A1,COL5A1,COL6A3,COL7A1,COL9A1,COL9A2,COL11A1,COL11A2,COL16A1,COL27A1,COL23A1
Pathway	M198	Syndecan-1-mediated signaling events	MSigDB C2 BIOCARTA (v7.3)	1.101e-08	3.017e-06	9	COL1A1,COL5A1,COL6A3,COL7A1,COL9A1,COL9A2,COL11A1,COL11A2,COL16A1
Pathway	M160	Integrins in angiogenesis	MSigDB C2 BIOCARTA (v7.3)	6.808e-08	1.244e-05	10	COL1A1,COL5A1,COL6A3,COL7A1,COL9A1,COL9A2,COL11A1,COL11A2,COL16A1,EDIL3
Pathway	M5884	Ensemble of genes encoding core extracellular matrix including ECM glycoproteins, collagens and proteoglycans	MSigDB C2 BIOCARTA (v7.3)	6.421e-06	0.0008797	15	SLIT2,COL1A1,COL5A1,COL6A3,COL7A1,COL9A1,COL9A2,COL11A1,COL11A2,COL16A1,TNC,COL27A1,EDIL3,EMILIN1,COL23A1
Pathway	M39814	GDNF/RET signalling axis	MSigDB C2 BIOCARTA (v7.3)	1.352e-05	0.001481	5	SOX11,GFRA1,SLIT2,GLI3,PAX2
Pathway	P00034	Integrin signalling pathway	PantherDB	2.078e-05	0.001898	11	COL1A1,COL5A1,COL6A3,COL7A1,COL9A1,COL9A2,COL11A1,COL11A2,COL16A1,COL27A1,MAPK10
Pathway	M39891	Genes controlling nephrogenesis	MSigDB C2 BIOCARTA (v7.3)	2.64e-05	0.002067	6	PDGFRB,SLIT2,HOXD11,GLI3,KIRREL1,PAX2
Pathway	M18	Beta1 integrin cell surface interactions	MSigDB C2 BIOCARTA (v7.3)	3.47e-05	0.002377	7	COL1A1,COL5A1,COL6A3,COL7A1,COL11A1,COL11A2,TNC
Pathway	M39706	Hedgehog Signaling Pathway	MSigDB C2 BIOCARTA (v7.3)	0.0003448	0.02099	5	GLI3,CDON,EVC2,KIF7,GPR161
Pathway	M7253	Focal adhesion	MSigDB C2 BIOCARTA (v7.3)	0.0004604	0.02346	10	PDGFRA,PDGFRB,COL1A1,COL5A1,COL6A3,FLNC,COL11A1,COL11A2,TNC,MAPK10
Pathway	M40048	Development of ureteric collection system	MSigDB C2 BIOCARTA (v7.3)	0.000471	0.02346	5	GFRA1,SLIT2,HOXD11,GLI3,PAX2
Pathway	M39599	Osteoblast Signaling	MSigDB C2 BIOCARTA (v7.3)	0.0008637	0.03944	3	PDGFRA,PDGFRB,COL1A1
Pathway	M39880	Ciliopathies	MSigDB C2 BIOCARTA (v7.3)	0.001074	0.04316	9	SPAG1,AHI1,GLI3,CC2D2A,EVC2,DYNC2I1,KIF7,GPR161,CSPP1
Pathway	M7098	ECM-receptor interaction	MSigDB C2 BIOCARTA (v7.3)	0.001103	0.04316	6	COL1A1,COL5A1,COL6A3,COL11A1,COL11A2,TNC
Pathway	M10792	MAPK signaling pathway	MSigDB C2 BIOCARTA (v7.3)	0.001259	0.046	11	PDGFRA,PDGFRB,NR4A1,MAPK8IP3,HSPA6,HSPB1,FLNC,NTRK2,MKNK2,PLA2G4B,MAPK10

## Sheet: Downregulated Biological Proces
S22. ToppGene biological processes output for genes with decreased expression levels in Male embryos from IVP compared to AI on d32
Category	ID	Name	p-value	q-value FDR B&H	Hit Count in Query List	Hit in Query List
GO: Biological Process	GO:1901137	carbohydrate derivative biosynthetic process	8.635e-17	4.661e-13	65	RPN1,RPN2,MGAT4A,ELOVL5,B3GALT5,MAGT1,ELOVL7,ADK,ACSL3,ACSL4,OSTC,MGAT1,MGAT2,PIGC,SCD,HPRT1,ALG5,UGCG,ITM2B,SDHC,SDHD,MCFD2,DOLK,COX8A,POMGNT1,ATP5MF,ALG2,ATP5MG,C1GALT1C1,PPT1,XXYLT1,PIGW,SOAT1,B3GALNT1,GALNT1,GALNT2,GALNT3,PSEN1,TMEM165,DAD1,SLC35B2,NDUFA4,GCNT1,NDUFB5,DDOST,ELOVL2,STT3A,XYLT2,MOGS,A4GALT,FAM20B,TMEM258,NPC1,PIGK,NT5E,PIGS,GXYLT1,HACD2,NCSTN,STT3B,TREM2,HSD17B12,B4GALNT2,TMSB4…
GO: Biological Process	GO:0006629	lipid metabolic process	3.803e-16	1.026e-12	91	PLBD1,ZMPSTE24,AGPAT5,ACER3,ELOVL5,TTPA,ELOVL7,ACSL3,ACSL4,CEPT1,PIGC,MGST2,MSMO1,SC5D,PIK3CB,LIPH,SCD,FDX1,AGTR1,UGCG,FADS2,PLA2G10,NCEH1,SLC25A17,CERS2,PLA2G3,DOLK,SPTLC1,PON2,NPC2,ALG2,PRDX6,GDE1,PDPN,PPT1,PLPP1,LRP10,PLPP3,ASAH1,EBP,PIGW,FUCA1,SOAT1,B3GALNT1,LGMN,TTC39B,SPTSSA,MBOAT1,SPP1,ECHDC1,SQLE,CYP51A1,AKR1D1,PTDSS1,SREBF1,GBA,DBI,MBOAT2,PTGS2,ELOVL2,CEACAM1,SGPP1,NEU1,LIPM,SMPDL3A,DHCR…
GO: Biological Process	GO:0044255	cellular lipid metabolic process	6.73e-15	9.191e-12	73	PLBD1,ZMPSTE24,AGPAT5,ACER3,ELOVL5,ELOVL7,ACSL3,ACSL4,CEPT1,PIGC,MGST2,MSMO1,PIK3CB,LIPH,SCD,AGTR1,UGCG,FADS2,PLA2G10,NCEH1,SLC25A17,CERS2,PLA2G3,DOLK,SPTLC1,PON2,NPC2,ALG2,PRDX6,GDE1,PDPN,PPT1,PLPP1,PLPP3,ASAH1,PIGW,FUCA1,SOAT1,B3GALNT1,SPTSSA,MBOAT1,ECHDC1,PTDSS1,SREBF1,GBA,DBI,MBOAT2,PTGS2,ELOVL2,CEACAM1,SGPP1,NEU1,SMPDL3A,SUMF1,A4GALT,LPGAT1,ADIPOR2,NUDT19,PIGK,PIGS,SLC44A2,HACD2,PLBD2,CERS5,…
GO: Biological Process	GO:1901135	carbohydrate derivative metabolic process	6.811e-15	9.191e-12	81	MAN2B1,RPN1,RPN2,MGAT4A,ELOVL5,B3GALT5,MAGT1,ELOVL7,ADK,ACSL3,ACSL4,OSTC,MGAT1,MGAT2,PIGC,SCD,HPRT1,ALG5,UGCG,MMP12,ITM2B,SDHC,SDHD,MCFD2,DOLK,COX8A,POMGNT1,ATP5MF,ENPP4,ALG2,ATP5MG,C1GALT1C1,PPT1,ASAH1,EDEM2,CST3,XXYLT1,PIGW,FUCA1,SOAT1,B3GALNT1,GALNT1,GALNT2,GALNT3,PSEN1,TMEM165,DAD1,GBA,SLC35B2,DBI,NDUFA4,GCNT1,NDUFB5,DDOST,ELOVL2,STT3A,XYLT2,LYVE1,NEU1,MOGS,SUMF1,A4GALT,FAM20B,TMEM258,GNS,NPC…
GO: Biological Process	GO:0006487	protein N-linked glycosylation	1.001e-14	1.081e-11	19	RPN1,RPN2,MGAT4A,MAGT1,OSTC,MGAT1,MGAT2,ALG5,MCFD2,DOLK,ALG2,TMEM165,DAD1,DDOST,STT3A,MOGS,TMEM258,STT3B,B4GALNT2
GO: Biological Process	GO:0002275	myeloid cell activation involved in immune response	2.003e-14	1.293e-11	49	MAN2B1,MAGT1,F2RL1,TYROBP,MGST1,QPCT,MME,PLA2G3,NPC2,ENPP4,PRDX6,ASAH1,RNASET2,CST3,TMEM30A,MRGPRX2,FUCA1,RAP2C,CTSD,CTSS,CTSZ,PSEN1,SIRPA,CREG1,ITGAV,DDOST,TMBIM1,CEACAM1,GGH,CMTM6,QSOX1,NEU1,PTPRJ,SURF4,GNS,GLIPR1,RAP1B,SLC44A2,LAMP1,GRN,LAMP2,NCSTN,NFAM1,CD14,ATP6AP2,TREM2,CD53,TNFAIP6,TNFRSF1B
GO: Biological Process	GO:0042119	neutrophil activation	2.158e-14	1.293e-11	46	MAN2B1,MAGT1,F2RL1,TYROBP,MGST1,QPCT,MME,NPC2,ENPP4,PRDX6,ASAH1,RNASET2,CST3,TMEM30A,FUCA1,RAP2C,CTSD,CTSS,CTSZ,PSEN1,SIRPA,CREG1,ITGAV,DDOST,TMBIM1,CEACAM1,GGH,CMTM6,QSOX1,NEU1,PTPRJ,SURF4,GNS,GLIPR1,RAP1B,SLC44A2,LAMP1,GRN,LAMP2,NCSTN,NFAM1,CD14,ATP6AP2,CD53,TNFAIP6,TNFRSF1B
GO: Biological Process	GO:0043312	neutrophil degranulation	2.363e-14	1.293e-11	45	MAN2B1,MAGT1,TYROBP,MGST1,QPCT,MME,NPC2,ENPP4,PRDX6,ASAH1,RNASET2,CST3,TMEM30A,FUCA1,RAP2C,CTSD,CTSS,CTSZ,PSEN1,SIRPA,CREG1,ITGAV,DDOST,TMBIM1,CEACAM1,GGH,CMTM6,QSOX1,NEU1,PTPRJ,SURF4,GNS,GLIPR1,RAP1B,SLC44A2,LAMP1,GRN,LAMP2,NCSTN,NFAM1,CD14,ATP6AP2,CD53,TNFAIP6,TNFRSF1B
GO: Biological Process	GO:0002446	neutrophil mediated immunity	2.491e-14	1.293e-11	46	MAN2B1,MAGT1,F2RL1,TYROBP,MGST1,QPCT,MME,NPC2,ENPP4,PRDX6,ASAH1,RNASET2,CST3,TMEM30A,FUCA1,RAP2C,CTSD,CTSS,CTSZ,PSEN1,SIRPA,CREG1,ITGAV,DDOST,TMBIM1,CEACAM1,GGH,CMTM6,QSOX1,NEU1,PTPRJ,SURF4,GNS,GLIPR1,RAP1B,SLC44A2,LAMP1,GRN,LAMP2,NCSTN,NFAM1,CD14,ATP6AP2,CD53,TNFAIP6,TNFRSF1B
GO: Biological Process	GO:0043299	leukocyte degranulation	2.803e-14	1.293e-11	48	MAN2B1,MAGT1,F2RL1,TYROBP,MGST1,QPCT,MME,PLA2G3,NPC2,ENPP4,PRDX6,ASAH1,RNASET2,CST3,TMEM30A,MRGPRX2,FUCA1,RAP2C,CTSD,CTSS,CTSZ,PSEN1,SIRPA,CREG1,ITGAV,DDOST,TMBIM1,CEACAM1,GGH,CMTM6,QSOX1,NEU1,PTPRJ,SURF4,GNS,GLIPR1,RAP1B,SLC44A2,LAMP1,GRN,LAMP2,NCSTN,NFAM1,CD14,ATP6AP2,CD53,TNFAIP6,TNFRSF1B
GO: Biological Process	GO:0002274	myeloid leukocyte activation	2.865e-14	1.293e-11	55	MAN2B1,MAGT1,F2RL1,TLR8,TYROBP,MGST1,QPCT,PLA2G10,MME,PLA2G3,NPC2,ENPP4,PRDX6,ASAH1,RNASET2,CST3,TMEM30A,MRGPRX2,FUCA1,RAP2C,CTSD,CTSS,CTSZ,PSEN1,ADAM9,SIRPA,CREG1,ITGAV,DDOST,TMBIM1,CEACAM1,GGH,CMTM6,QSOX1,NEU1,PTPRJ,SURF4,NECTIN2,GNS,GLIPR1,RAP1B,SLC44A2,LAMP1,GRN,LAMP2,NCSTN,NFAM1,CD14,ATP6AP2,TREM2,CD48,CD53,IL1RL1,TNFAIP6,TNFRSF1B
GO: Biological Process	GO:0070085	glycosylation	2.892e-14	1.293e-11	33	RPN1,RPN2,MGAT4A,B3GALT5,MAGT1,OSTC,MGAT1,MGAT2,CLN5,ALG5,MCFD2,DOLK,POMGNT1,ALG2,C1GALT1C1,XXYLT1,B3GALNT1,GALNT1,GALNT2,GALNT3,PSEN1,TMEM165,DAD1,GBA,GCNT1,DDOST,STT3A,MOGS,TMEM258,NPC1,GXYLT1,STT3B,B4GALNT2
GO: Biological Process	GO:0036230	granulocyte activation	3.314e-14	1.293e-11	46	MAN2B1,MAGT1,F2RL1,TYROBP,MGST1,QPCT,MME,NPC2,ENPP4,PRDX6,ASAH1,RNASET2,CST3,TMEM30A,FUCA1,RAP2C,CTSD,CTSS,CTSZ,PSEN1,SIRPA,CREG1,ITGAV,DDOST,TMBIM1,CEACAM1,GGH,CMTM6,QSOX1,NEU1,PTPRJ,SURF4,GNS,GLIPR1,RAP1B,SLC44A2,LAMP1,GRN,LAMP2,NCSTN,NFAM1,CD14,ATP6AP2,CD53,TNFAIP6,TNFRSF1B
GO: Biological Process	GO:0002283	neutrophil activation involved in immune response	3.407e-14	1.293e-11	45	MAN2B1,MAGT1,TYROBP,MGST1,QPCT,MME,NPC2,ENPP4,PRDX6,ASAH1,RNASET2,CST3,TMEM30A,FUCA1,RAP2C,CTSD,CTSS,CTSZ,PSEN1,SIRPA,CREG1,ITGAV,DDOST,TMBIM1,CEACAM1,GGH,CMTM6,QSOX1,NEU1,PTPRJ,SURF4,GNS,GLIPR1,RAP1B,SLC44A2,LAMP1,GRN,LAMP2,NCSTN,NFAM1,CD14,ATP6AP2,CD53,TNFAIP6,TNFRSF1B
GO: Biological Process	GO:0009100	glycoprotein metabolic process	3.592e-14	1.293e-11	42	MAN2B1,RPN1,RPN2,MGAT4A,B3GALT5,MAGT1,OSTC,MGAT1,MGAT2,ALG5,MMP12,ITM2B,MCFD2,DOLK,POMGNT1,ALG2,C1GALT1C1,EDEM2,CST3,XXYLT1,SOAT1,B3GALNT1,GALNT1,GALNT2,GALNT3,PSEN1,TMEM165,DAD1,GCNT1,DDOST,STT3A,XYLT2,MOGS,FAM20B,TMEM258,NPC1,DERL2,GXYLT1,NCSTN,STT3B,B4GALNT2,RNF139
GO: Biological Process	GO:0008610	lipid biosynthetic process	6.938e-14	2.341e-11	57	AGPAT5,ACER3,ELOVL5,ELOVL7,ACSL3,ACSL4,CEPT1,PIGC,MSMO1,SC5D,PIK3CB,LIPH,SCD,FDX1,UGCG,FADS2,PLA2G10,CERS2,PLA2G3,DOLK,SPTLC1,PLPP1,PLPP3,ASAH1,EBP,PIGW,SPTSSA,MBOAT1,SQLE,CYP51A1,AKR1D1,PTDSS1,SREBF1,GBA,DBI,MBOAT2,PTGS2,ELOVL2,CEACAM1,SGPP1,DHCR7,A4GALT,LPGAT1,PRPF19,ADIPOR2,PIGK,PIGS,SLC44A2,HACD2,CERS5,ADIPOR1,SLC44A1,FADS1,DHRS9,HSD17B12,TNFRSF1A,HSD17B11
GO: Biological Process	GO:0018279	protein N-linked glycosylation via asparagine	7.583e-14	2.408e-11	13	RPN1,RPN2,MAGT1,OSTC,MGAT1,MGAT2,ALG5,MCFD2,DAD1,DDOST,STT3A,STT3B,B4GALNT2
GO: Biological Process	GO:0018196	peptidyl-asparagine modification	1.277e-13	3.83e-11	13	RPN1,RPN2,MAGT1,OSTC,MGAT1,MGAT2,ALG5,MCFD2,DAD1,DDOST,STT3A,STT3B,B4GALNT2
GO: Biological Process	GO:0002444	myeloid leukocyte mediated immunity	1.461e-13	4.15e-11	48	MAN2B1,MAGT1,F2RL1,TYROBP,MGST1,QPCT,MME,PLA2G3,NPC2,ENPP4,PRDX6,ASAH1,RNASET2,CST3,TMEM30A,MRGPRX2,FUCA1,RAP2C,CTSD,CTSS,CTSZ,PSEN1,SIRPA,CREG1,ITGAV,DDOST,TMBIM1,CEACAM1,GGH,CMTM6,QSOX1,NEU1,PTPRJ,SURF4,GNS,GLIPR1,RAP1B,SLC44A2,LAMP1,GRN,LAMP2,NCSTN,NFAM1,CD14,ATP6AP2,CD53,TNFAIP6,TNFRSF1B
GO: Biological Process	GO:0043413	macromolecule glycosylation	2.304e-13	5.922e-11	31	RPN1,RPN2,MGAT4A,B3GALT5,MAGT1,OSTC,MGAT1,MGAT2,ALG5,MCFD2,DOLK,POMGNT1,ALG2,C1GALT1C1,XXYLT1,B3GALNT1,GALNT1,GALNT2,GALNT3,PSEN1,TMEM165,DAD1,GCNT1,DDOST,STT3A,MOGS,TMEM258,NPC1,GXYLT1,STT3B,B4GALNT2
GO: Biological Process	GO:0006486	protein glycosylation	2.304e-13	5.922e-11	31	RPN1,RPN2,MGAT4A,B3GALT5,MAGT1,OSTC,MGAT1,MGAT2,ALG5,MCFD2,DOLK,POMGNT1,ALG2,C1GALT1C1,XXYLT1,B3GALNT1,GALNT1,GALNT2,GALNT3,PSEN1,TMEM165,DAD1,GCNT1,DDOST,STT3A,MOGS,TMEM258,NPC1,GXYLT1,STT3B,B4GALNT2
GO: Biological Process	GO:0009101	glycoprotein biosynthetic process	8.706e-13	2.136e-10	36	RPN1,RPN2,MGAT4A,B3GALT5,MAGT1,OSTC,MGAT1,MGAT2,ALG5,ITM2B,MCFD2,DOLK,POMGNT1,ALG2,C1GALT1C1,XXYLT1,SOAT1,B3GALNT1,GALNT1,GALNT2,GALNT3,PSEN1,TMEM165,DAD1,GCNT1,DDOST,STT3A,XYLT2,MOGS,FAM20B,TMEM258,NPC1,GXYLT1,NCSTN,STT3B,B4GALNT2
GO: Biological Process	GO:0006643	membrane lipid metabolic process	1.266e-12	2.972e-10	28	ACER3,ELOVL5,ELOVL7,PIGC,MGST2,UGCG,CERS2,SPTLC1,PPT1,PLPP1,PLPP3,ASAH1,PIGW,FUCA1,B3GALNT1,SPTSSA,GBA,ELOVL2,SGPP1,NEU1,SMPDL3A,SUMF1,A4GALT,PIGK,PIGS,HACD2,CERS5,TNFRSF1A
GO: Biological Process	GO:0045055	regulated exocytosis	1.126e-11	2.533e-09	56	MAN2B1,MAGT1,F2RL1,TYROBP,MGST1,QPCT,FAM3C,MME,SELENOP,PLA2G3,NPC2,ENPP4,PRDX6,ASAH1,RNASET2,CST3,TMEM30A,MRGPRX2,FUCA1,RAP2C,RIMS2,CTSD,CTSS,CTSZ,PSEN1,SIRPA,CREG1,ITGAV,DDOST,TMBIM1,CEACAM1,GGH,CMTM6,QSOX1,NEU1,PTPRJ,SURF4,MANF,GNS,GLIPR1,RAP1B,SLC44A2,LAMP1,GRN,LAMP2,NCSTN,NFAM1,TGFB2,CD14,P2RY1,ATP6AP2,CD53,TMSB4X,SDF4,TNFAIP6,TNFRSF1B
GO: Biological Process	GO:0140352	export from cell	1.439e-11	3.106e-09	83	MAN2B1,MAGT1,F2RL1,TYRO3,ACSL4,TYROBP,MGST1,AGTR1,QPCT,FAM3C,PLA2G10,CCL8,MME,MMP13,SDHD,SELENOP,COMP,PLA2G3,NPC2,ENPP4,SLC40A1,PRDX6,SLC12A2,ASAH1,MCU,RNASET2,CST3,TMEM30A,MRGPRX2,FUCA1,ATP12A,RAP2C,ATP1B3,RAB21,RIMS2,CTSD,CTSS,CTSZ,SELENOT,ATP6AP1,PSEN1,SPP1,ADAM9,TM7SF3,CYP51A1,SREBF1,SIRPA,CREG1,ITGAV,DDOST,TMBIM1,CEACAM1,GGH,CMTM6,QSOX1,NEU1,PTPRJ,SURF4,MANF,ERP29,GNS,GLIPR1,RAP1B,SLC44A2,LA…
GO: Biological Process	GO:0002366	leukocyte activation involved in immune response	2.033e-11	4.221e-09	52	MAN2B1,CD46,MAGT1,F2RL1,TYROBP,MGST1,QPCT,MME,PLA2G3,NPC2,ENPP4,PRDX6,ASAH1,RNASET2,CST3,TMEM30A,MRGPRX2,FUCA1,RAP2C,CTSD,CTSS,CTSZ,PSEN1,SIRPA,CREG1,ITGAV,IL18R1,DDOST,TMBIM1,CEACAM1,GGH,CMTM6,QSOX1,NEU1,PTPRJ,SURF4,GNS,GLIPR1,RAP1B,SLC44A2,LAMP1,GRN,LAMP2,NCSTN,NFAM1,CD14,CD86,ATP6AP2,TREM2,CD53,TNFAIP6,TNFRSF1B
GO: Biological Process	GO:0002263	cell activation involved in immune response	2.467e-11	4.932e-09	52	MAN2B1,CD46,MAGT1,F2RL1,TYROBP,MGST1,QPCT,MME,PLA2G3,NPC2,ENPP4,PRDX6,ASAH1,RNASET2,CST3,TMEM30A,MRGPRX2,FUCA1,RAP2C,CTSD,CTSS,CTSZ,PSEN1,SIRPA,CREG1,ITGAV,IL18R1,DDOST,TMBIM1,CEACAM1,GGH,CMTM6,QSOX1,NEU1,PTPRJ,SURF4,GNS,GLIPR1,RAP1B,SLC44A2,LAMP1,GRN,LAMP2,NCSTN,NFAM1,CD14,CD86,ATP6AP2,TREM2,CD53,TNFAIP6,TNFRSF1B
GO: Biological Process	GO:0032940	secretion by cell	3.947e-11	7.609e-09	80	MAN2B1,MAGT1,F2RL1,TYRO3,ACSL4,TYROBP,MGST1,AGTR1,QPCT,FAM3C,PLA2G10,CCL8,MME,MMP13,SDHD,SELENOP,COMP,PLA2G3,NPC2,ENPP4,PRDX6,SLC12A2,ASAH1,MCU,RNASET2,CST3,TMEM30A,MRGPRX2,FUCA1,RAP2C,RAB21,RIMS2,CTSD,CTSS,CTSZ,SELENOT,ATP6AP1,PSEN1,SPP1,ADAM9,TM7SF3,CYP51A1,SREBF1,SIRPA,CREG1,ITGAV,DDOST,TMBIM1,CEACAM1,GGH,CMTM6,QSOX1,NEU1,PTPRJ,SURF4,MANF,ERP29,GNS,GLIPR1,RAP1B,SLC44A2,LAMP1,GRN,LAMP2,NCSTN,NF…
GO: Biological Process	GO:0055085	transmembrane transport	6.563e-11	1.222e-08	89	GPR155,SPNS1,RAMP3,ZMPSTE24,MAGT1,GRPEL2,SGK3,MET,CLCN3,SLC35A2,SLC35E3,TMCO1,MFSD1,SLC25A17,SDHC,SDHD,VDAC3,SLC37A3,DERL1,ARL6IP5,COX8A,SLC39A4,ATP5MF,SLC40A1,PDPN,ATP5MG,SLC30A5,SLC12A2,SLC20A1,MCU,ATP6V0A4,TSPAN13,TMEM30A,ATP12A,OCLN,ATP1B3,SLC2A12,LMBRD1,CTSS,ATP6V1C1,SLC16A13,ATP6V0B,SELENOS,ATP6AP1,PSEN1,SLC39A1,SLC38A9,SLC39A11,TMEM165,PSMB3,SLC35B2,DBI,NDUFA4,ITGAV,SLC30A4,NDUFB5,CLCC1,SL…
GO: Biological Process	GO:0006887	exocytosis	9.477e-11	1.599e-08	59	MAN2B1,MAGT1,F2RL1,TYROBP,MGST1,QPCT,FAM3C,CCL8,MME,SELENOP,PLA2G3,NPC2,ENPP4,PRDX6,ASAH1,RNASET2,CST3,TMEM30A,MRGPRX2,FUCA1,RAP2C,RAB21,RIMS2,CTSD,CTSS,CTSZ,ATP6AP1,PSEN1,SIRPA,CREG1,ITGAV,DDOST,TMBIM1,CEACAM1,GGH,CMTM6,QSOX1,NEU1,PTPRJ,SURF4,MANF,GNS,GLIPR1,RAP1B,SLC44A2,LAMP1,GRN,LAMP2,NCSTN,NFAM1,TGFB2,CD14,P2RY1,ATP6AP2,CD53,TMSB4X,SDF4,TNFAIP6,TNFRSF1B
GO: Biological Process	GO:0140029	exocytic process	9.477e-11	1.599e-08	59	MAN2B1,MAGT1,F2RL1,TYROBP,MGST1,QPCT,FAM3C,CCL8,MME,SELENOP,PLA2G3,NPC2,ENPP4,PRDX6,ASAH1,RNASET2,CST3,TMEM30A,MRGPRX2,FUCA1,RAP2C,RAB21,RIMS2,CTSD,CTSS,CTSZ,ATP6AP1,PSEN1,SIRPA,CREG1,ITGAV,DDOST,TMBIM1,CEACAM1,GGH,CMTM6,QSOX1,NEU1,PTPRJ,SURF4,MANF,GNS,GLIPR1,RAP1B,SLC44A2,LAMP1,GRN,LAMP2,NCSTN,NFAM1,TGFB2,CD14,P2RY1,ATP6AP2,CD53,TMSB4X,SDF4,TNFAIP6,TNFRSF1B
GO: Biological Process	GO:0099500	vesicle fusion to plasma membrane	9.477e-11	1.599e-08	59	MAN2B1,MAGT1,F2RL1,TYROBP,MGST1,QPCT,FAM3C,CCL8,MME,SELENOP,PLA2G3,NPC2,ENPP4,PRDX6,ASAH1,RNASET2,CST3,TMEM30A,MRGPRX2,FUCA1,RAP2C,RAB21,RIMS2,CTSD,CTSS,CTSZ,ATP6AP1,PSEN1,SIRPA,CREG1,ITGAV,DDOST,TMBIM1,CEACAM1,GGH,CMTM6,QSOX1,NEU1,PTPRJ,SURF4,MANF,GNS,GLIPR1,RAP1B,SLC44A2,LAMP1,GRN,LAMP2,NCSTN,NFAM1,TGFB2,CD14,P2RY1,ATP6AP2,CD53,TMSB4X,SDF4,TNFAIP6,TNFRSF1B
GO: Biological Process	GO:0006906	vesicle fusion	1.061e-10	1.736e-08	61	MAN2B1,BET1,MAGT1,F2RL1,TYROBP,MGST1,QPCT,FAM3C,CCL8,MME,SELENOP,PLA2G3,NPC2,ENPP4,PRDX6,ASAH1,RNASET2,CST3,TMEM30A,MRGPRX2,FUCA1,RAP2C,RAB21,RIMS2,CTSD,CTSS,CTSZ,ATP6AP1,PSEN1,SIRPA,CREG1,ITGAV,DDOST,TMBIM1,CEACAM1,GGH,CMTM6,QSOX1,NEU1,PTPRJ,SURF4,MANF,TAPBP,GNS,GLIPR1,RAP1B,SLC44A2,LAMP1,GRN,LAMP2,NCSTN,NFAM1,TGFB2,CD14,P2RY1,ATP6AP2,CD53,TMSB4X,SDF4,TNFAIP6,TNFRSF1B
GO: Biological Process	GO:0061025	membrane fusion	1.222e-10	1.94e-08	65	MAN2B1,BET1,MAGT1,F2RL1,TYROBP,MGST1,QPCT,FAM3C,CCL8,MME,SELENOP,PLA2G3,NPC2,ENPP4,PRDX6,ASAH1,RNASET2,CST3,TMEM30A,MRGPRX2,FUCA1,RAP2C,RAB21,RIMS2,CTSD,CTSS,CTSZ,ATP6AP1,PSEN1,ADAM9,SIRPA,CREG1,ITGAV,DDOST,TMBIM1,CEACAM1,GGH,CMTM6,QSOX1,NEU1,PTPRJ,SURF4,NECTIN2,MANF,TAPBP,GNS,GLIPR1,RAP1B,SLC44A2,LAMP1,GRN,LAMP2,NCSTN,NFAM1,TGFB2,CD14,P2RY1,ATP6AP2,TREM2,CD53,TMSB4X,SDF4,TNFAIP6,TNFRSF1B,SERPINA5
GO: Biological Process	GO:0090174	organelle membrane fusion	1.341e-10	2.068e-08	61	MAN2B1,BET1,MAGT1,F2RL1,TYROBP,MGST1,QPCT,FAM3C,CCL8,MME,SELENOP,PLA2G3,NPC2,ENPP4,PRDX6,ASAH1,RNASET2,CST3,TMEM30A,MRGPRX2,FUCA1,RAP2C,RAB21,RIMS2,CTSD,CTSS,CTSZ,ATP6AP1,PSEN1,SIRPA,CREG1,ITGAV,DDOST,TMBIM1,CEACAM1,GGH,CMTM6,QSOX1,NEU1,PTPRJ,SURF4,MANF,TAPBP,GNS,GLIPR1,RAP1B,SLC44A2,LAMP1,GRN,LAMP2,NCSTN,NFAM1,TGFB2,CD14,P2RY1,ATP6AP2,CD53,TMSB4X,SDF4,TNFAIP6,TNFRSF1B
GO: Biological Process	GO:0046467	membrane lipid biosynthetic process	1.401e-10	2.1e-08	21	ACER3,ELOVL5,ELOVL7,PIGC,UGCG,CERS2,SPTLC1,PLPP1,PLPP3,ASAH1,PIGW,SPTSSA,GBA,ELOVL2,SGPP1,A4GALT,PIGK,PIGS,HACD2,CERS5,TNFRSF1A
GO: Biological Process	GO:0048284	organelle fusion	1.789e-10	2.61e-08	62	MAN2B1,BET1,MAGT1,F2RL1,TYROBP,MGST1,QPCT,FAM3C,CCL8,MME,SELENOP,PLA2G3,NPC2,ENPP4,PRDX6,ASAH1,RNASET2,CST3,TMEM30A,MRGPRX2,FUCA1,RAP2C,RAB21,RIMS2,CTSD,CTSS,CTSZ,ATP6AP1,PSEN1,SIRPA,CREG1,ITGAV,DDOST,TMBIM1,CEACAM1,GGH,CMTM6,QSOX1,NEU1,PTPRJ,SURF4,MANF,TAPBP,GNS,GLIPR1,RAP1B,SLC44A2,LAMP1,GRN,LAMP2,NCSTN,NFAM1,TGFB2,CD14,P2RY1,ZDHHC6,ATP6AP2,CD53,TMSB4X,SDF4,TNFAIP6,TNFRSF1B
GO: Biological Process	GO:0006665	sphingolipid metabolic process	3.278e-10	4.656e-08	22	ACER3,ELOVL5,ELOVL7,UGCG,CERS2,SPTLC1,PPT1,PLPP1,PLPP3,ASAH1,B3GALNT1,SPTSSA,GBA,ELOVL2,SGPP1,NEU1,SMPDL3A,SUMF1,A4GALT,HACD2,CERS5,TNFRSF1A
GO: Biological Process	GO:0002443	leukocyte mediated immunity	3.41e-10	4.72e-08	57	MAN2B1,CD46,MAGT1,F2RL1,TLR8,TYROBP,MGST1,HPRT1,QPCT,MME,PLA2G3,NPC2,ENPP4,PRDX6,ASAH1,RNASET2,CST3,TMEM30A,MRGPRX2,FUCA1,IL1R1,RAP2C,CTSD,CTSS,CTSZ,PSEN1,IL20RB,SIRPA,CREG1,ITGAV,IL18R1,DDOST,TMBIM1,CEACAM1,GGH,CMTM6,QSOX1,NEU1,PTPRJ,SURF4,NECTIN2,C2,GNS,GLIPR1,RAP1B,SLC44A2,LAMP1,GRN,LAMP2,NCSTN,NFAM1,CD14,ATP6AP2,PRDX1,CD53,TNFAIP6,TNFRSF1B
GO: Biological Process	GO:0001775	cell activation	9.905e-10	1.337e-07	80	MAN2B1,CD46,MAGT1,DNAJB9,F2RL1,TLR8,FZD6,ADK,TYRO3,TYROBP,MGST1,PIK3CB,HPRT1,QPCT,PLA2G10,MME,VCAM1,COMP,PLA2G3,NPC2,ENPP4,PRDX6,PDPN,C1GALT1C1,ASAH1,RNASET2,CST3,TMEM30A,MRGPRX2,FUCA1,RAP2C,CTSD,CTSS,CTSZ,CXADR,PRELID1,PSEN1,ADAM9,GBA,IL20RB,SIRPA,SAMSN1,CREG1,ITGAV,IL18R1,DDOST,TMBIM1,CEACAM1,GGH,CMTM6,BMI1,QSOX1,NEU1,F11R,PTPRJ,SURF4,NECTIN2,TWSG1,PPP2R3C,GNS,GLIPR1,RAP1B,SLC44A2,LAMP1,GRN,LAM…
GO: Biological Process	GO:0046903	secretion	1.711e-09	2.253e-07	81	MAN2B1,MAGT1,F2RL1,ACSL3,TYRO3,ACSL4,TYROBP,MGST1,AGTR1,QPCT,FAM3C,PLA2G10,CCL8,MME,MMP13,SDHD,SELENOP,COMP,PLA2G3,NPC2,ENPP4,PRDX6,SLC12A2,ASAH1,MCU,RNASET2,CST3,TMEM30A,MRGPRX2,FUCA1,RAP2C,RAB21,RIMS2,CTSD,CTSS,CTSZ,SELENOT,ATP6AP1,PSEN1,SPP1,ADAM9,TM7SF3,CYP51A1,SREBF1,SIRPA,CREG1,ITGAV,DDOST,TMBIM1,CEACAM1,GGH,CMTM6,QSOX1,NEU1,PTPRJ,SURF4,MANF,ERP29,GNS,GLIPR1,RAP1B,SLC44A2,LAMP1,GRN,LAMP2,NC…
GO: Biological Process	GO:0016050	vesicle organization	1.862e-09	2.393e-07	86	RAMP3,MAN2B1,BET1,LAPTM4B,MAGT1,F2RL1,TYROBP,CLCN3,MGST1,PIK3CB,QPCT,FAM3C,NCEH1,CCL8,SRPX,MME,MRC1,SELENOP,MCFD2,PLA2G3,NPC2,ENPP4,PRDX6,MSR1,PPT1,LRP10,ASAH1,RNASET2,CST3,TMEM30A,MRGPRX2,FUCA1,RAP2C,RAB21,RIMS2,CTSD,LMBRD1,CTSS,CTSZ,SNX2,SOAT1,ATP6AP1,PSEN1,SIRPA,ITGA2,CREG1,ITGAV,DDOST,TMBIM1,CEACAM1,GGH,CMTM6,QSOX1,NEU1,PTPRJ,SURF4,NECTIN2,MANF,TMED2,TAPBP,GNS,NPC1,GLIPR1,RAP1B,RAB17,SLC44A2,…
GO: Biological Process	GO:0045851	pH reduction	2.085e-09	2.618e-07	13	TTPA,CLCN3,CLN5,TMEM106B,PPT1,ATP6V0A4,ATP6V1C1,ATP6V0B,ATP6AP1,ATP6V0E1,GRN,ATP6AP2,ATP6V0A2
GO: Biological Process	GO:0030004	cellular monovalent inorganic cation homeostasis	2.19e-09	2.687e-07	18	TTPA,CLCN3,CLN5,TMEM106B,SLC12A2,PPT1,ATP6V0A4,ATP12A,ATP1B3,ATP6V1C1,ATP6V0B,ATP6AP1,SPP1,TMEM165,ATP6V0E1,GRN,ATP6AP2,ATP6V0A2
GO: Biological Process	GO:0045321	leukocyte activation	2.26e-09	2.711e-07	73	MAN2B1,CD46,MAGT1,DNAJB9,F2RL1,TLR8,ADK,TYRO3,TYROBP,MGST1,HPRT1,QPCT,PLA2G10,MME,VCAM1,PLA2G3,NPC2,ENPP4,PRDX6,ASAH1,RNASET2,CST3,TMEM30A,MRGPRX2,FUCA1,RAP2C,CTSD,CTSS,CTSZ,CXADR,PRELID1,PSEN1,ADAM9,GBA,IL20RB,SIRPA,SAMSN1,CREG1,ITGAV,IL18R1,DDOST,TMBIM1,CEACAM1,GGH,CMTM6,BMI1,QSOX1,NEU1,PTPRJ,SURF4,NECTIN2,TWSG1,PPP2R3C,GNS,GLIPR1,RAP1B,SLC44A2,LAMP1,GRN,LAMP2,NCSTN,SLC39A10,NFAM1,CD14,CD86,ATP…
GO: Biological Process	GO:0030148	sphingolipid biosynthetic process	2.447e-09	2.872e-07	17	ACER3,ELOVL5,ELOVL7,UGCG,CERS2,SPTLC1,PLPP1,PLPP3,ASAH1,SPTSSA,GBA,ELOVL2,SGPP1,A4GALT,HACD2,CERS5,TNFRSF1A
GO: Biological Process	GO:0002252	immune effector process	2.526e-09	2.901e-07	71	MAN2B1,ZMPSTE24,CD46,MAGT1,F2RL1,TLR8,TYROBP,MGST1,PIK3CB,HPRT1,QPCT,PLA2G10,MME,MMP12,PLA2G3,NPC2,ENPP4,IFI27,PRDX6,ASAH1,RNASET2,CST3,TMEM30A,MRGPRX2,FUCA1,IL1R1,RAP2C,CTSD,IFI6,CTSS,CTSZ,CXADR,PSEN1,IL20RB,SIRPA,CREG1,ITGAV,IL18R1,DDOST,TMBIM1,CEACAM1,GGH,CMTM6,QSOX1,NEU1,RNF125,PTPRJ,SURF4,NECTIN2,C2,GNS,GLIPR1,RAP1B,SLC44A2,LAMP1,GRN,LAMP2,NCSTN,TMBIM6,NFAM1,ARPC3,ACTR3,TGFB2,CD14,CD86,ATP6A…
GO: Biological Process	GO:0051452	intracellular pH reduction	1.013e-08	1.139e-06	12	TTPA,CLCN3,CLN5,TMEM106B,PPT1,ATP6V0A4,ATP6V1C1,ATP6V0B,ATP6V0E1,GRN,ATP6AP2,ATP6V0A2
GO: Biological Process	GO:0034220	ion transmembrane transport	2.476e-08	2.728e-06	74	RAMP3,ZMPSTE24,MAGT1,GRPEL2,SGK3,MET,CLCN3,SLC35A2,TMCO1,SLC25A17,SDHC,SDHD,VDAC3,SLC37A3,ARL6IP5,COX8A,SLC39A4,ATP5MF,SLC40A1,PDPN,ATP5MG,SLC30A5,SLC12A2,SLC20A1,MCU,ATP6V0A4,TSPAN13,ATP12A,OCLN,ATP1B3,SLC2A12,LMBRD1,CTSS,ATP6V1C1,ATP6V0B,SELENOS,ATP6AP1,PSEN1,SLC39A1,SLC38A9,SLC39A11,TMEM165,SLC35B2,DBI,NDUFA4,ITGAV,SLC30A4,NDUFB5,CLCC1,SLC38A1,KCNK1,SEC61B,NIPA2,SLC16A11,SLC23A1,ADIPOR2,ATP6V0…
GO: Biological Process	GO:0046949	fatty-acyl-CoA biosynthetic process	3.552e-08	3.835e-06	9	ELOVL5,ELOVL7,ACSL3,ACSL4,SCD,PPT1,ELOVL2,HACD2,HSD17B12
GO: Biological Process	GO:0007035	vacuolar acidification	8.885e-08	9.404e-06	8	CLN5,TMEM106B,PPT1,ATP6V0A4,ATP6V0E1,GRN,ATP6AP2,ATP6V0A2
GO: Biological Process	GO:0030641	regulation of cellular pH	1.253e-07	1.3e-05	14	TTPA,CLCN3,CLN5,TMEM106B,PPT1,ATP6V0A4,ATP6V1C1,ATP6V0B,ATP6AP1,TMEM165,ATP6V0E1,GRN,ATP6AP2,ATP6V0A2
GO: Biological Process	GO:0006885	regulation of pH	1.333e-07	1.357e-05	15	TTPA,CLCN3,CLN5,TMEM106B,PPT1,ATP6V0A4,ATP12A,ATP6V1C1,ATP6V0B,ATP6AP1,TMEM165,ATP6V0E1,GRN,ATP6AP2,ATP6V0A2
GO: Biological Process	GO:0006631	fatty acid metabolic process	1.618e-07	1.617e-05	30	ELOVL5,ELOVL7,ACSL3,ACSL4,MSMO1,LIPH,SCD,FADS2,PLA2G10,SLC25A17,PLA2G3,PON2,PDPN,ASAH1,ECHDC1,SREBF1,DBI,PTGS2,ELOVL2,CEACAM1,LPGAT1,ADIPOR2,NUDT19,HACD2,LIPA,ADIPOR1,FADS1,HSD17B12,CYP2U1,TNFRSF1A
GO: Biological Process	GO:0055067	monovalent inorganic cation homeostasis	1.715e-07	1.683e-05	19	TTPA,CLCN3,CLN5,AGTR1,TMEM106B,SLC12A2,PPT1,ATP6V0A4,ATP12A,ATP1B3,ATP6V1C1,ATP6V0B,ATP6AP1,SPP1,TMEM165,ATP6V0E1,GRN,ATP6AP2,ATP6V0A2
GO: Biological Process	GO:0035338	long-chain fatty-acyl-CoA biosynthetic process	1.923e-07	1.854e-05	7	ELOVL5,ELOVL7,ACSL3,ACSL4,ELOVL2,HACD2,HSD17B12
GO: Biological Process	GO:0070972	protein localization to endoplasmic reticulum	2.556e-07	2.42e-05	17	RPL27,RPL34,RPS13,RPS17,RPS20,RPS21,RPS26,RPS27,RPS29,SRPRB,SPCS3,SPCS2,SSR3,SEC61B,KDELR2,RER1,TRAM1
GO: Biological Process	GO:0006670	sphingosine metabolic process	2.897e-07	2.696e-05	7	ACER3,SPTLC1,PLPP1,PLPP3,ASAH1,GBA,SGPP1
GO: Biological Process	GO:0016485	protein processing	3.115e-07	2.815e-05	22	ZMPSTE24,SPCS3,CLN5,MME,COMP,CPD,TMEM208,CTSS,CTSZ,LGMN,PSEN1,PLGRKT,ADAM9,SPCS2,PERP,SEC11C,NCSTN,ECE1,RFX4,ATP6AP2,SEC11A,RNF139
GO: Biological Process	GO:0051453	regulation of intracellular pH	3.129e-07	2.815e-05	13	TTPA,CLCN3,CLN5,TMEM106B,PPT1,ATP6V0A4,ATP6V1C1,ATP6V0B,TMEM165,ATP6V0E1,GRN,ATP6AP2,ATP6V0A2
GO: Biological Process	GO:0045047	protein targeting to ER	3.262e-07	2.887e-05	15	RPL27,RPL34,RPS13,RPS17,RPS20,RPS21,RPS26,RPS27,RPS29,SRPRB,SPCS3,SPCS2,SSR3,SEC61B,TRAM1
GO: Biological Process	GO:0006633	fatty acid biosynthetic process	3.569e-07	3.049e-05	18	ELOVL5,ELOVL7,ACSL3,LIPH,SCD,FADS2,PLA2G10,PLA2G3,SREBF1,PTGS2,ELOVL2,CEACAM1,LPGAT1,ADIPOR2,HACD2,ADIPOR1,FADS1,HSD17B12
GO: Biological Process	GO:0000041	transition metal ion transport	3.606e-07	3.049e-05	16	PGRMC2,SLC39A4,SLC40A1,SLC30A5,ATP6V0A4,ATP6V1C1,ATP6V0B,ATP6AP1,SLC39A1,SLC39A11,TMEM165,SLC30A4,ATP6V0E1,TCN2,SLC39A10,ATP6V0A2
GO: Biological Process	GO:0043603	cellular amide metabolic process	3.615e-07	3.049e-05	61	RPL27,MAGOH,RPL34,ACER3,RPS13,ELOVL5,RTN3,RPS17,RPS20,RPS21,RPS26,RPS27,RPS29,ELOVL7,ACSL3,ACSL4,SPCS3,MGST1,MGST2,MRPS17,SCD,CLN5,UGCG,MME,MMP13,EIF4E2,CERS2,ARL6IP5,SPTLC1,CPD,PPT1,PLPP1,PLPP3,ASAH1,MRPS33,CTSZ,SELENOT,SPTSSA,PSEN1,SPCS2,GBA,SEC11C,DBI,ITGA2,SSR3,ELOVL2,NEU1,SMPDL3A,SEC61B,TMED2,TAPBP,HACD2,NCSTN,ECE1,CERS5,ATP6AP2,TRAM1,SEC11A,HSD17B12,TNFRSF1A,RNF139
GO: Biological Process	GO:0090407	organophosphate biosynthetic process	4.188e-07	3.478e-05	42	AGPAT5,ELOVL5,ELOVL7,ADK,ACSL3,ACSL4,CEPT1,PIGC,PIK3CB,LIPH,SCD,HPRT1,PLA2G10,SDHC,SDHD,DOLK,SPTLC1,COX8A,ATP5MF,ATP5MG,PPT1,PIGW,MBOAT1,PTDSS1,SLC35B2,NDUFA4,NDUFB5,MBOAT2,PTGS2,ELOVL2,LPGAT1,PIGK,PIGS,SLC44A2,HACD2,SLC44A1,FADS1,P2RY1,TREM2,HSD17B12,TMSB4X,COX7A2L
GO: Biological Process	GO:0072599	establishment of protein localization to endoplasmic reticulum	4.965e-07	4.061e-05	15	RPL27,RPL34,RPS13,RPS17,RPS20,RPS21,RPS26,RPS27,RPS29,SRPRB,SPCS3,SPCS2,SSR3,SEC61B,TRAM1
GO: Biological Process	GO:0051604	protein maturation	5.28e-07	4.254e-05	25	ZMPSTE24,SPCS3,CLN5,MME,CIAO2A,COMP,CPD,NAA50,TMEM208,CTSS,CTSZ,LGMN,GALNT2,PSEN1,PLGRKT,ADAM9,SPCS2,PERP,SEC11C,NCSTN,ECE1,RFX4,ATP6AP2,SEC11A,RNF139
GO: Biological Process	GO:0046519	sphingoid metabolic process	6.109e-07	4.849e-05	7	ACER3,SPTLC1,PLPP1,PLPP3,ASAH1,GBA,SGPP1
GO: Biological Process	GO:0035337	fatty-acyl-CoA metabolic process	7.66e-07	5.992e-05	9	ELOVL5,ELOVL7,ACSL3,ACSL4,SCD,PPT1,ELOVL2,HACD2,HSD17B12
GO: Biological Process	GO:0044283	small molecule biosynthetic process	1.072e-06	8.265e-05	41	ACER3,ELOVL5,ELOVL7,ADK,ACSL3,MGST2,MSMO1,SC5D,LIPH,SCD,HPRT1,FADS2,FAM3C,PLA2G10,ASNSD1,PLA2G3,SPTLC1,ASAH1,EBP,SELENOS,SPP1,SQLE,CYP51A1,AKR1D1,SREBF1,GBA,PTGS2,ELOVL2,CEACAM1,SMPDL3A,DHCR7,LPGAT1,ENPP5,ADIPOR2,NT5E,HACD2,ADIPOR1,FADS1,P2RY1,DHRS9,HSD17B12
GO: Biological Process	GO:0006644	phospholipid metabolic process	1.239e-06	9.416e-05	29	PLBD1,AGPAT5,ACSL3,CEPT1,PIGC,PIK3CB,LIPH,PLA2G10,PLA2G3,DOLK,SPTLC1,PRDX6,GDE1,PLPP1,PLPP3,PIGW,MBOAT1,PTDSS1,DBI,MBOAT2,SGPP1,SMPDL3A,LPGAT1,PIGK,PIGS,SLC44A2,PLBD2,SLC44A1,FADS1
GO: Biological Process	GO:0072330	monocarboxylic acid biosynthetic process	1.609e-06	0.0001195	20	ELOVL5,ELOVL7,ACSL3,LIPH,SCD,FADS2,PLA2G10,PLA2G3,AKR1D1,SREBF1,PTGS2,ELOVL2,CEACAM1,LPGAT1,ADIPOR2,HACD2,ADIPOR1,FADS1,DHRS9,HSD17B12
GO: Biological Process	GO:0035336	long-chain fatty-acyl-CoA metabolic process	1.616e-06	0.0001195	7	ELOVL5,ELOVL7,ACSL3,ACSL4,ELOVL2,HACD2,HSD17B12
GO: Biological Process	GO:0035751	regulation of lysosomal lumen pH	2.011e-06	0.0001467	6	CLN5,TMEM106B,PPT1,TMEM165,GRN,ATP6AP2
GO: Biological Process	GO:0046466	membrane lipid catabolic process	4.58e-06	0.0003296	8	ACER3,MGST2,PPT1,ASAH1,FUCA1,GBA,NEU1,SMPDL3A
GO: Biological Process	GO:0006636	unsaturated fatty acid biosynthetic process	5.694e-06	0.0003998	9	ELOVL5,ELOVL7,SCD,FADS2,PLA2G10,PLA2G3,PTGS2,ELOVL2,FADS1
GO: Biological Process	GO:0007042	lysosomal lumen acidification	5.814e-06	0.0003998	5	CLN5,TMEM106B,PPT1,GRN,ATP6AP2
GO: Biological Process	GO:0006465	signal peptide processing	5.814e-06	0.0003998	5	SPCS3,CLN5,SPCS2,SEC11C,SEC11A
GO: Biological Process	GO:0019637	organophosphate metabolic process	5.851e-06	0.0003998	55	PLBD1,AGPAT5,ELOVL5,ELOVL7,ADK,ACSL3,ACSL4,CEPT1,PIGC,PIK3CB,LIPH,SCD,HPRT1,PLA2G10,SDHC,SDHD,PLA2G3,DOLK,SPTLC1,COX8A,ATP5MF,PRDX6,GDE1,ATP5MG,PPT1,PLPP1,PLPP3,PIGW,MBOAT1,PSEN1,PTDSS1,SLC35B2,DBI,NDUFA4,NDUFB5,MBOAT2,PTGS2,ELOVL2,SGPP1,SMPDL3A,LPGAT1,ENPP5,PIGK,NT5E,PIGS,SLC44A2,HACD2,PLBD2,SLC44A1,FADS1,P2RY1,TREM2,HSD17B12,TMSB4X,COX7A2L
GO: Biological Process	GO:0034311	diol metabolic process	6.157e-06	0.0004144	7	ACER3,SPTLC1,PLPP1,PLPP3,ASAH1,GBA,SGPP1
GO: Biological Process	GO:0033866	nucleoside bisphosphate biosynthetic process	6.371e-06	0.0004144	10	ELOVL5,ELOVL7,ACSL3,ACSL4,SCD,PPT1,SLC35B2,ELOVL2,HACD2,HSD17B12
GO: Biological Process	GO:0034030	ribonucleoside bisphosphate biosynthetic process	6.371e-06	0.0004144	10	ELOVL5,ELOVL7,ACSL3,ACSL4,SCD,PPT1,SLC35B2,ELOVL2,HACD2,HSD17B12
GO: Biological Process	GO:0034033	purine nucleoside bisphosphate biosynthetic process	6.371e-06	0.0004144	10	ELOVL5,ELOVL7,ACSL3,ACSL4,SCD,PPT1,SLC35B2,ELOVL2,HACD2,HSD17B12
GO: Biological Process	GO:0071616	acyl-CoA biosynthetic process	6.662e-06	0.0004231	9	ELOVL5,ELOVL7,ACSL3,ACSL4,SCD,PPT1,ELOVL2,HACD2,HSD17B12
GO: Biological Process	GO:0035384	thioester biosynthetic process	6.662e-06	0.0004231	9	ELOVL5,ELOVL7,ACSL3,ACSL4,SCD,PPT1,ELOVL2,HACD2,HSD17B12
GO: Biological Process	GO:0098656	anion transmembrane transport	7.319e-06	0.0004594	33	GRPEL2,MET,CLCN3,SLC35A2,SLC25A17,VDAC3,SLC37A3,ARL6IP5,PDPN,SLC12A2,SLC20A1,OCLN,SLC2A12,LMBRD1,SELENOS,PSEN1,SLC38A9,SLC35B2,CLCC1,SLC38A1,SEC61B,SLC16A11,SLC23A1,ADIPOR2,SLC19A3,OAZ1,SLC7A7,LRRC8D,RGS4,TRAM1,LRRC8B,SLC16A7,SLC35B1
GO: Biological Process	GO:0016042	lipid catabolic process	7.52e-06	0.0004666	24	PLBD1,ACER3,MGST2,LIPH,PLA2G10,NCEH1,SLC25A17,PRDX6,GDE1,PPT1,ASAH1,FUCA1,SPP1,ECHDC1,AKR1D1,GBA,DBI,NEU1,LIPM,SMPDL3A,NUDT19,PLBD2,LIPA,HSD17B11
GO: Biological Process	GO:0071634	regulation of transforming growth factor beta production	8.099e-06	0.0004968	8	LAPTM4B,CD46,MET,TYROBP,ITGAV,PTGS2,TGFB2,ATP6AP2
GO: Biological Process	GO:0006614	SRP-dependent cotranslational protein targeting to membrane	9.692e-06	0.0005878	12	RPL27,RPL34,RPS13,RPS17,RPS20,RPS21,RPS26,RPS27,RPS29,SSR3,SEC61B,TRAM1
GO: Biological Process	GO:1902652	secondary alcohol metabolic process	9.818e-06	0.0005889	16	MSMO1,SC5D,SCD,FDX1,NPC2,IDH3A,EBP,SOAT1,TTC39B,SQLE,CYP51A1,AKR1D1,SREBF1,GBA,DHCR7,NPC1
GO: Biological Process	GO:0009152	purine ribonucleotide biosynthetic process	1.029e-05	0.0006106	22	ELOVL5,ELOVL7,ADK,ACSL3,ACSL4,SCD,HPRT1,SDHC,SDHD,COX8A,ATP5MF,ATP5MG,PPT1,SLC35B2,NDUFA4,NDUFB5,ELOVL2,HACD2,TREM2,HSD17B12,TMSB4X,COX7A2L
GO: Biological Process	GO:0019725	cellular homeostasis	1.044e-05	0.0006127	51	RAMP3,F2RL1,TTPA,TYRO3,TXNL1,CLCN3,PIK3CB,CLN5,AGTR1,CCL8,TMCO1,VCAM1,SLC39A4,SLC40A1,PRDX6,TMEM106B,SLC30A5,SLC12A2,PPT1,MCU,ATP6V0A4,ATP12A,ATP1B3,SELENOT,ATP6V1C1,ATP6V0B,SELENOS,ATP6AP1,PSEN1,SPP1,TMEM165,DBI,ITGAV,SLC30A4,QSOX1,ATP6V0E1,GRN,LAMP2,SLC39A10,TMBIM6,TXNDC12,TGFB2,TMX2,SIDT2,EFNA5,TXNDC15,P2RY1,ATP6AP2,PRDX1,LPAR2,ATP6V0A2
GO: Biological Process	GO:0006672	ceramide metabolic process	1.069e-05	0.0006206	12	ACER3,UGCG,CERS2,SPTLC1,PLPP1,PLPP3,ASAH1,SPTSSA,GBA,NEU1,CERS5,TNFRSF1A
GO: Biological Process	GO:0071604	transforming growth factor beta production	1.154e-05	0.0006624	8	LAPTM4B,CD46,MET,TYROBP,ITGAV,PTGS2,TGFB2,ATP6AP2
GO: Biological Process	GO:0016125	sterol metabolic process	1.208e-05	0.0006866	16	MSMO1,SC5D,SCD,FDX1,NPC2,EBP,SOAT1,TTC39B,SQLE,CYP51A1,AKR1D1,SREBF1,GBA,DHCR7,NPC1,LIPA
GO: Biological Process	GO:0006613	cotranslational protein targeting to membrane	1.565e-05	0.0008799	12	RPL27,RPL34,RPS13,RPS17,RPS20,RPS21,RPS26,RPS27,RPS29,SSR3,SEC61B,TRAM1
GO: Biological Process	GO:0008203	cholesterol metabolic process	1.645e-05	0.0009154	15	MSMO1,SC5D,SCD,FDX1,NPC2,EBP,SOAT1,TTC39B,SQLE,CYP51A1,AKR1D1,SREBF1,GBA,DHCR7,NPC1
GO: Biological Process	GO:0006812	cation transport	1.687e-05	0.000929	59	RAMP3,ZMPSTE24,MAGT1,CLCN3,PGRMC2,CCL8,TMCO1,SLC25A17,SDHC,SDHD,PLA2G3,COX8A,NDFIP2,SLC39A4,ATP5MF,SLC40A1,ATP5MG,SLC30A5,SLC12A2,SLC20A1,MCU,ATP6V0A4,TSPAN13,SARAF,ATP12A,ATP1B3,CTSS,ATP6V1C1,ATP6V0B,ATP6AP1,PSEN1,SLC39A1,SLC38A9,SLC39A11,TMEM165,DBI,NDUFA4,ITGAV,SLC30A4,NDUFB5,PTGS2,SLC38A1,KCNK1,NIPA2,SLC23A1,ATP6V0E1,TCN2,SLC44A2,TOR1A,SLC39A10,TMBIM6,RGS4,TGFB2,SLC44A1,TREM2,TMSB4X,COX7A2L,S…
GO: Biological Process	GO:1901570	fatty acid derivative biosynthetic process	1.828e-05	0.0009876	9	ELOVL5,ELOVL7,ACSL3,ACSL4,SCD,PPT1,ELOVL2,HACD2,HSD17B12
GO: Biological Process	GO:0072522	purine-containing compound biosynthetic process	1.83e-05	0.0009876	23	ELOVL5,ELOVL7,ADK,ACSL3,ACSL4,SCD,HPRT1,SDHC,SDHD,COX8A,ATP5MF,ATP5MG,PPT1,SLC35B2,NDUFA4,NDUFB5,ELOVL2,NT5E,HACD2,TREM2,HSD17B12,TMSB4X,COX7A2L
GO: Biological Process	GO:0030003	cellular cation homeostasis	1.879e-05	0.001004	38	RAMP3,F2RL1,TTPA,CLCN3,PIK3CB,CLN5,AGTR1,CCL8,TMCO1,SLC39A4,SLC40A1,TMEM106B,SLC30A5,SLC12A2,PPT1,MCU,ATP6V0A4,ATP12A,ATP1B3,SELENOT,ATP6V1C1,ATP6V0B,ATP6AP1,PSEN1,SPP1,TMEM165,DBI,ITGAV,SLC30A4,ATP6V0E1,GRN,SLC39A10,TMBIM6,TGFB2,P2RY1,ATP6AP2,LPAR2,ATP6V0A2
GO: Biological Process	GO:0009260	ribonucleotide biosynthetic process	1.934e-05	0.001024	22	ELOVL5,ELOVL7,ADK,ACSL3,ACSL4,SCD,HPRT1,SDHC,SDHD,COX8A,ATP5MF,ATP5MG,PPT1,SLC35B2,NDUFA4,NDUFB5,ELOVL2,HACD2,TREM2,HSD17B12,TMSB4X,COX7A2L
GO: Biological Process	GO:0098662	inorganic cation transmembrane transport	2.215e-05	0.001161	44	RAMP3,MAGT1,CLCN3,TMCO1,SDHC,SDHD,COX8A,SLC39A4,ATP5MF,SLC40A1,ATP5MG,SLC30A5,SLC12A2,SLC20A1,MCU,ATP6V0A4,TSPAN13,ATP12A,ATP1B3,ATP6V1C1,ATP6V0B,ATP6AP1,PSEN1,SLC39A1,SLC39A11,TMEM165,DBI,NDUFA4,ITGAV,SLC30A4,NDUFB5,KCNK1,NIPA2,SLC23A1,ATP6V0E1,TCN2,SLC39A10,RGS4,TGFB2,TREM2,TMSB4X,COX7A2L,SLC33A1,ATP6V0A2
GO: Biological Process	GO:0071577	zinc ion transmembrane transport	2.438e-05	0.001252	6	SLC39A4,SLC30A5,SLC39A1,SLC39A11,SLC30A4,SLC39A10
GO: Biological Process	GO:0010876	lipid localization	2.447e-05	0.001252	31	SPNS1,SIGMAR1,TTPA,ACSL3,ACSL4,AGTR1,UGCG,PLA2G10,SLC25A17,ARL6IP5,PLA2G3,NPC2,MSR1,SLC12A2,LRP10,TMEM30A,SOAT1,TTC39B,PRELID1,PSEN1,SPP1,SQLE,SREBF1,GBA,DBI,ITGAV,CEACAM1,SGPP1,NPC1,LRRC8D,SERPINA5
GO: Biological Process	GO:0006664	glycolipid metabolic process	2.458e-05	0.001252	12	PIGC,UGCG,ASAH1,PIGW,FUCA1,B3GALNT1,GBA,NEU1,SUMF1,A4GALT,PIGK,PIGS
GO: Biological Process	GO:0046390	ribose phosphate biosynthetic process	2.556e-05	0.001289	22	ELOVL5,ELOVL7,ADK,ACSL3,ACSL4,SCD,HPRT1,SDHC,SDHD,COX8A,ATP5MF,ATP5MG,PPT1,SLC35B2,NDUFA4,NDUFB5,ELOVL2,HACD2,TREM2,HSD17B12,TMSB4X,COX7A2L
GO: Biological Process	GO:0006066	alcohol metabolic process	2.602e-05	0.0013	25	ACER3,MSMO1,SC5D,SCD,FDX1,SPTLC1,NPC2,IDH3A,GDE1,PLPP1,PLPP3,ASAH1,EBP,SOAT1,TTC39B,SQLE,CYP51A1,AKR1D1,SREBF1,GBA,SGPP1,DHCR7,NPC1,P2RY1,DHRS9
GO: Biological Process	GO:1903509	liposaccharide metabolic process	2.682e-05	0.001328	12	PIGC,UGCG,ASAH1,PIGW,FUCA1,B3GALNT1,GBA,NEU1,SUMF1,A4GALT,PIGK,PIGS
GO: Biological Process	GO:0048878	chemical homeostasis	2.82e-05	0.001384	58	RAMP3,S100A14,F2RL1,TTPA,MET,CLCN3,PIK3CB,CLN5,AGTR1,UGCG,PLA2G10,CCL8,TMCO1,VCAM1,SLC39A4,NPC2,SLC40A1,TMEM106B,SLC30A5,SLC12A2,PPT1,MCU,ATP6V0A4,ATP12A,ATP1B3,IFI6,SOAT1,SELENOT,TTC39B,TLCD1,ATP6V1C1,ATP6V0B,ATP6AP1,PSEN1,SPP1,TMEM165,GBA,DBI,ITGAV,SLC30A4,PTPRJ,TMEM97,PPP2R3C,ADIPOR2,NPC1,ATP6V0E1,GRN,SLC39A10,TMBIM6,TGFB2,SIDT2,ADIPOR1,EFNA5,P2RY1,ATP6AP2,LPAR2,TLCD3A,ATP6V0A2
GO: Biological Process	GO:0006873	cellular ion homeostasis	2.896e-05	0.001408	38	RAMP3,F2RL1,TTPA,CLCN3,PIK3CB,CLN5,AGTR1,CCL8,TMCO1,SLC39A4,SLC40A1,TMEM106B,SLC30A5,SLC12A2,PPT1,MCU,ATP6V0A4,ATP12A,ATP1B3,SELENOT,ATP6V1C1,ATP6V0B,ATP6AP1,PSEN1,SPP1,TMEM165,DBI,ITGAV,SLC30A4,ATP6V0E1,GRN,SLC39A10,TMBIM6,TGFB2,P2RY1,ATP6AP2,LPAR2,ATP6V0A2
GO: Biological Process	GO:1901565	organonitrogen compound catabolic process	3.086e-05	0.001488	59	ZMPSTE24,ACER3,LAPTM4B,RNF13,BFAR,DNAJB9,UBE2D2,ATRAID,CLN5,HPRT1,PLA2G10,MMP12,MMP13,DERL1,ANAPC11,NDFIP2,DDO,ENPP4,IFI27,TMEM106B,RNF167,PPT1,ASAH1,EDEM2,CST3,FUCA1,CTSD,CTSS,CTSZ,LGMN,RNF130,SELENOS,PSEN1,ADAM9,CYP51A1,PSMB3,GBA,CEACAM1,LYVE1,NEU1,RNF125,SMPDL3A,SEC61B,PRPF19,GNS,NT5E,DERL2,TOR1A,GRN,LAMP2,OAZ1,ECE1,STT3B,SLC44A1,TREM2,TNFRSF1B,RNF139,UBE2W,MAD2L1
GO: Biological Process	GO:0033559	unsaturated fatty acid metabolic process	3.184e-05	0.001521	12	ELOVL5,ELOVL7,SCD,FADS2,PLA2G10,PLA2G3,PDPN,PTGS2,ELOVL2,FADS1,CYP2U1,TNFRSF1A
GO: Biological Process	GO:0009057	macromolecule catabolic process	3.572e-05	0.001691	62	RPL27,MAGOH,RPL34,ZMPSTE24,LAPTM4B,RPS13,RPS17,RNF13,RPS20,BFAR,RPS21,RPS26,RPS27,RPS29,DNAJB9,UBE2D2,ATRAID,CLN5,MMP12,DERL1,ANAPC11,NDFIP2,IFI27,TMEM106B,RNF167,PPT1,RNASET2,EDEM2,CST3,FUCA1,CTSD,CTSS,CTSZ,LGMN,RNF130,SELENOS,PSEN1,ADAM9,CYP51A1,PSMB3,GBA,CEACAM1,LSM3,LYVE1,RNF125,SEC61B,PRPF19,GNS,DNASE2,DERL2,TOR1A,GRN,LAMP2,OAZ1,STT3B,SMG8,SIDT2,TREM2,TNFRSF1B,RNF139,UBE2W,MAD2L1
GO: Biological Process	GO:0006164	purine nucleotide biosynthetic process	3.661e-05	0.001701	22	ELOVL5,ELOVL7,ADK,ACSL3,ACSL4,SCD,HPRT1,SDHC,SDHD,COX8A,ATP5MF,ATP5MG,PPT1,SLC35B2,NDUFA4,NDUFB5,ELOVL2,HACD2,TREM2,HSD17B12,TMSB4X,COX7A2L
GO: Biological Process	GO:1902600	proton transmembrane transport	3.667e-05	0.001701	19	CLCN3,SDHC,SDHD,COX8A,ATP5MF,ATP5MG,SLC30A5,ATP6V0A4,ATP12A,ATP6V1C1,ATP6V0B,ATP6AP1,NDUFA4,NDUFB5,ATP6V0E1,TMSB4X,COX7A2L,SLC33A1,ATP6V0A2
GO: Biological Process	GO:0044242	cellular lipid catabolic process	3.686e-05	0.001701	18	PLBD1,ACER3,MGST2,LIPH,PLA2G10,SLC25A17,PRDX6,GDE1,PPT1,ASAH1,FUCA1,ECHDC1,GBA,DBI,NEU1,SMPDL3A,NUDT19,PLBD2
GO: Biological Process	GO:0006605	protein targeting	4.146e-05	0.001897	27	RPL27,RPL34,RPS13,RPS17,RPS20,RPS21,RPS26,RPS27,RPS29,SRPRB,GRPEL2,SPCS3,UBE2D2,ZFAND6,DDO,SPCS2,SREBF1,SSR3,TIMM8A,SEC61B,NUDT19,LAMP2,ACTR3,ICMT,ZDHHC6,TRAM1,M6PR
GO: Biological Process	GO:0046394	carboxylic acid biosynthetic process	4.361e-05	0.001978	22	ELOVL5,ELOVL7,ACSL3,MGST2,LIPH,SCD,FADS2,PLA2G10,ASNSD1,PLA2G3,AKR1D1,SREBF1,PTGS2,ELOVL2,CEACAM1,LPGAT1,ADIPOR2,HACD2,ADIPOR1,FADS1,DHRS9,HSD17B12
GO: Biological Process	GO:0008202	steroid metabolic process	4.548e-05	0.002037	23	MSMO1,SC5D,SCD,FDX1,AGTR1,NPC2,ASAH1,EBP,SOAT1,LGMN,TTC39B,SPP1,SQLE,CYP51A1,AKR1D1,SREBF1,GBA,DHCR7,NPC1,LIPA,DHRS9,HSD17B12,HSD17B11
GO: Biological Process	GO:0097242	amyloid-beta clearance	4.567e-05	0.002037	7	TTPA,MME,PLA2G3,MSR1,CYP51A1,TREM2,LRP4
GO: Biological Process	GO:0098660	inorganic ion transmembrane transport	4.873e-05	0.002156	46	RAMP3,MAGT1,CLCN3,TMCO1,SDHC,SDHD,SLC37A3,COX8A,SLC39A4,ATP5MF,SLC40A1,ATP5MG,SLC30A5,SLC12A2,SLC20A1,MCU,ATP6V0A4,TSPAN13,ATP12A,ATP1B3,ATP6V1C1,ATP6V0B,ATP6AP1,PSEN1,SLC39A1,SLC39A11,TMEM165,DBI,NDUFA4,ITGAV,SLC30A4,NDUFB5,CLCC1,KCNK1,NIPA2,SLC23A1,ATP6V0E1,TCN2,SLC39A10,RGS4,TGFB2,TREM2,TMSB4X,COX7A2L,SLC33A1,ATP6V0A2
GO: Biological Process	GO:0007029	endoplasmic reticulum organization	5.139e-05	0.002239	11	RTN3,GET1,EMC6,EMC7,EMC3,TMED2,LMAN2,REEP5,DOP1B,TMEM33,TRAM1
GO: Biological Process	GO:0044409	entry into host	5.143e-05	0.002239	14	CD46,TYRO3,MET,MRC1,CXADR,SPINT1,ITGA2,ITGAV,F11R,NECTIN2,NPC1,LAMP1,CLDN6,CD86
GO: Biological Process	GO:0033490	cholesterol biosynthetic process via lathosterol	5.665e-05	0.002427	3	SC5D,EBP,DHCR7
GO: Biological Process	GO:0033489	cholesterol biosynthetic process via desmosterol	5.665e-05	0.002427	3	SC5D,EBP,DHCR7
GO: Biological Process	GO:0016053	organic acid biosynthetic process	6.13e-05	0.002605	22	ELOVL5,ELOVL7,ACSL3,MGST2,LIPH,SCD,FADS2,PLA2G10,ASNSD1,PLA2G3,AKR1D1,SREBF1,PTGS2,ELOVL2,CEACAM1,LPGAT1,ADIPOR2,HACD2,ADIPOR1,FADS1,DHRS9,HSD17B12
GO: Biological Process	GO:0008654	phospholipid biosynthetic process	6.301e-05	0.002657	19	AGPAT5,ACSL3,CEPT1,PIGC,PIK3CB,LIPH,PLA2G10,DOLK,SPTLC1,PIGW,MBOAT1,PTDSS1,MBOAT2,LPGAT1,PIGK,PIGS,SLC44A2,SLC44A1,FADS1
GO: Biological Process	GO:0006869	lipid transport	6.579e-05	0.002751	28	SPNS1,SIGMAR1,TTPA,ACSL3,ACSL4,AGTR1,UGCG,PLA2G10,SLC25A17,ARL6IP5,PLA2G3,NPC2,MSR1,SLC12A2,LRP10,TMEM30A,SOAT1,TTC39B,PRELID1,PSEN1,SPP1,DBI,ITGAV,CEACAM1,SGPP1,NPC1,LRRC8D,SERPINA5
GO: Biological Process	GO:0072657	protein localization to membrane	6.625e-05	0.002751	36	RPL27,RPL34,RAMP3,RPS13,RPS17,RPS20,RPS21,RPS26,RPS27,RPS29,ACSL3,TM9SF2,TM9SF1,ARL6IP5,GET1,PIGW,ATP1B3,EMC6,EMC7,EMC3,TM9SF3,SSR3,TMBIM1,F11R,SEC61B,TMED2,NPC1,RER1,ACTR3,P2RY1,ICMT,ZDHHC6,TRAM1,TREM2,LRP4,TNFRSF1A
GO: Biological Process	GO:1905146	lysosomal protein catabolic process	7.41e-05	0.00303	5	LAPTM4B,TMEM106B,GBA,GRN,LAMP2
GO: Biological Process	GO:0045048	protein insertion into ER membrane	7.41e-05	0.00303	5	GET1,EMC6,EMC7,EMC3,TRAM1
GO: Biological Process	GO:0046890	regulation of lipid biosynthetic process	8.121e-05	0.003296	17	ELOVL5,ACSL3,SC5D,SCD,PLA2G3,ASAH1,SQLE,CYP51A1,SREBF1,DBI,PTGS2,CEACAM1,DHCR7,LPGAT1,ADIPOR2,ADIPOR1,TNFRSF1A
GO: Biological Process	GO:0046470	phosphatidylcholine metabolic process	8.198e-05	0.003303	10	PLBD1,ACSL3,CEPT1,PLA2G10,PLA2G3,MBOAT1,DBI,MBOAT2,SLC44A2,SLC44A1
GO: Biological Process	GO:0046718	viral entry into host cell	8.681e-05	0.003471	13	CD46,TYRO3,MRC1,CXADR,SPINT1,ITGA2,ITGAV,F11R,NECTIN2,NPC1,LAMP1,CLDN6,CD86
GO: Biological Process	GO:0006829	zinc ion transport	8.951e-05	0.003552	6	SLC39A4,SLC30A5,SLC39A1,SLC39A11,SLC30A4,SLC39A10
GO: Biological Process	GO:0035966	response to topologically incorrect protein	9.016e-05	0.003552	16	BFAR,DNAJB9,SRPRB,COMP,DERL1,EDEM2,SELENOS,TM7SF3,MANF,TMED2,DERL2,TOR1A,TMBIM6,STT3B,TMEM33,UBE2W
GO: Biological Process	GO:0050801	ion homeostasis	9.088e-05	0.003555	41	RAMP3,S100A14,F2RL1,TTPA,CLCN3,PIK3CB,CLN5,AGTR1,CCL8,TMCO1,SLC39A4,SLC40A1,TMEM106B,SLC30A5,SLC12A2,PPT1,MCU,ATP6V0A4,ATP12A,ATP1B3,IFI6,SELENOT,ATP6V1C1,ATP6V0B,ATP6AP1,PSEN1,SPP1,TMEM165,DBI,ITGAV,SLC30A4,PPP2R3C,ATP6V0E1,GRN,SLC39A10,TMBIM6,TGFB2,P2RY1,ATP6AP2,LPAR2,ATP6V0A2
GO: Biological Process	GO:0098655	cation transmembrane transport	9.435e-05	0.003638	46	RAMP3,MAGT1,CLCN3,TMCO1,SDHC,SDHD,COX8A,SLC39A4,ATP5MF,SLC40A1,ATP5MG,SLC30A5,SLC12A2,SLC20A1,MCU,ATP6V0A4,TSPAN13,ATP12A,ATP1B3,CTSS,ATP6V1C1,ATP6V0B,ATP6AP1,PSEN1,SLC39A1,SLC38A9,SLC39A11,TMEM165,DBI,NDUFA4,ITGAV,SLC30A4,NDUFB5,KCNK1,NIPA2,SLC23A1,ATP6V0E1,TCN2,SLC39A10,RGS4,TGFB2,TREM2,TMSB4X,COX7A2L,SLC33A1,ATP6V0A2
GO: Biological Process	GO:0032787	monocarboxylic acid metabolic process	9.435e-05	0.003638	34	ELOVL5,ELOVL7,ACSL3,ACSL4,MSMO1,LIPH,SCD,FADS2,PLA2G10,SLC25A17,PLA2G3,PON2,PDPN,ASAH1,PSEN1,ECHDC1,AKR1D1,SREBF1,DBI,PTGS2,ELOVL2,CEACAM1,LPGAT1,ADIPOR2,NPC1,NUDT19,HACD2,LIPA,ADIPOR1,FADS1,DHRS9,HSD17B12,CYP2U1,TNFRSF1A
GO: Biological Process	GO:0055080	cation homeostasis	9.757e-05	0.003735	39	RAMP3,S100A14,F2RL1,TTPA,CLCN3,PIK3CB,CLN5,AGTR1,CCL8,TMCO1,SLC39A4,SLC40A1,TMEM106B,SLC30A5,SLC12A2,PPT1,MCU,ATP6V0A4,ATP12A,ATP1B3,SELENOT,ATP6V1C1,ATP6V0B,ATP6AP1,PSEN1,SPP1,TMEM165,DBI,ITGAV,SLC30A4,ATP6V0E1,GRN,SLC39A10,TMBIM6,TGFB2,P2RY1,ATP6AP2,LPAR2,ATP6V0A2
GO: Biological Process	GO:0042304	regulation of fatty acid biosynthetic process	9.944e-05	0.00378	8	ELOVL5,PLA2G3,SREBF1,PTGS2,CEACAM1,LPGAT1,ADIPOR2,ADIPOR1
GO: Biological Process	GO:0007040	lysosome organization	0.0001052	0.003944	9	LAPTM4B,CLN5,SRPX,TMEM106B,PPT1,TMEM165,GBA,GRN,ATP6AP2
GO: Biological Process	GO:0080171	lytic vacuole organization	0.0001052	0.003944	9	LAPTM4B,CLN5,SRPX,TMEM106B,PPT1,TMEM165,GBA,GRN,ATP6AP2
GO: Biological Process	GO:0016266	O-glycan processing	0.000112	0.004171	8	POMGNT1,C1GALT1C1,XXYLT1,GALNT1,GALNT2,GALNT3,GCNT1,GXYLT1
GO: Biological Process	GO:0030163	protein catabolic process	0.0001168	0.004317	44	ZMPSTE24,LAPTM4B,RNF13,BFAR,DNAJB9,UBE2D2,ATRAID,CLN5,MMP12,DERL1,ANAPC11,NDFIP2,IFI27,TMEM106B,RNF167,PPT1,EDEM2,CST3,CTSD,CTSS,CTSZ,LGMN,RNF130,SELENOS,PSEN1,ADAM9,CYP51A1,PSMB3,GBA,CEACAM1,RNF125,SEC61B,PRPF19,DERL2,TOR1A,GRN,LAMP2,OAZ1,STT3B,TREM2,TNFRSF1B,RNF139,UBE2W,MAD2L1
GO: Biological Process	GO:0044265	cellular macromolecule catabolic process	0.0001315	0.004827	52	RPL27,MAGOH,RPL34,ZMPSTE24,LAPTM4B,RPS13,RPS17,RNF13,RPS20,BFAR,RPS21,RPS26,RPS27,RPS29,DNAJB9,UBE2D2,ATRAID,MMP12,DERL1,ANAPC11,NDFIP2,IFI27,TMEM106B,RNF167,RNASET2,EDEM2,CST3,CTSS,CTSZ,LGMN,RNF130,SELENOS,PSEN1,PSMB3,GBA,LSM3,RNF125,SEC61B,PRPF19,DNASE2,DERL2,TOR1A,GRN,LAMP2,STT3B,SMG8,SIDT2,TREM2,TNFRSF1B,RNF139,UBE2W,MAD2L1
GO: Biological Process	GO:0098771	inorganic ion homeostasis	0.0001342	0.004896	39	RAMP3,S100A14,F2RL1,TTPA,CLCN3,PIK3CB,CLN5,AGTR1,CCL8,TMCO1,SLC39A4,SLC40A1,TMEM106B,SLC30A5,SLC12A2,PPT1,MCU,ATP6V0A4,ATP12A,ATP1B3,SELENOT,ATP6V1C1,ATP6V0B,ATP6AP1,PSEN1,SPP1,TMEM165,DBI,ITGAV,SLC30A4,ATP6V0E1,GRN,SLC39A10,TMBIM6,TGFB2,P2RY1,ATP6AP2,LPAR2,ATP6V0A2
GO: Biological Process	GO:0002282	microglial cell activation involved in immune response	0.000139	0.005004	3	TYROBP,GRN,TREM2
GO: Biological Process	GO:0034241	positive regulation of macrophage fusion	0.000139	0.005004	3	TYROBP,ADAM9,TREM2
GO: Biological Process	GO:0045454	cell redox homeostasis	0.0001418	0.00507	9	TXNL1,PRDX6,SELENOT,SELENOS,QSOX1,TXNDC12,TMX2,TXNDC15,PRDX1
GO: Biological Process	GO:0044070	regulation of anion transport	0.0001491	0.005295	45	F2RL1,ACSL3,ACSL4,MET,AGTR1,PLA2G10,MMP13,SDHD,ARL6IP5,PLA2G3,EI24,NDFIP2,IFI27,SLC12A2,MCU,EDEM2,TMEM30A,OCLN,LMBRD1,SELENOT,TTC39B,SELENOS,PRELID1,PSEN1,SPP1,ADAM9,TM7SF3,CYP51A1,SREBF1,DBI,ITGAV,PTGS2,ERP29,ADIPOR2,DERL2,TOR1A,OAZ1,RGS4,ACTR3,TGFB2,SIDT2,EFNA5,P2RY1,TREM2,TNFRSF1A
GO: Biological Process	GO:0006650	glycerophospholipid metabolic process	0.0001712	0.006038	21	PLBD1,AGPAT5,ACSL3,CEPT1,PIGC,PIK3CB,LIPH,PLA2G10,PLA2G3,PRDX6,GDE1,PIGW,MBOAT1,PTDSS1,DBI,MBOAT2,LPGAT1,PIGK,PIGS,SLC44A2,SLC44A1
GO: Biological Process	GO:0000184	nuclear-transcribed mRNA catabolic process, nonsense-mediated decay	0.0001726	0.006051	11	RPL27,MAGOH,RPL34,RPS13,RPS17,RPS20,RPS21,RPS26,RPS27,RPS29,SMG8
GO: Biological Process	GO:0019216	regulation of lipid metabolic process	0.0001765	0.006148	25	ZMPSTE24,ELOVL5,ACSL3,ACSL4,SC5D,SCD,AGTR1,PLA2G3,NPC2,PLPP1,ASAH1,TTC39B,SQLE,CYP51A1,SREBF1,DBI,PTGS2,CEACAM1,DHCR7,LPGAT1,ADIPOR2,GLIPR1,ADIPOR1,FADS1,TNFRSF1A
GO: Biological Process	GO:0030149	sphingolipid catabolic process	0.0001817	0.006287	6	ACER3,PPT1,ASAH1,GBA,NEU1,SMPDL3A
GO: Biological Process	GO:1901568	fatty acid derivative metabolic process	0.0001885	0.00648	9	ELOVL5,ELOVL7,ACSL3,ACSL4,SCD,PPT1,ELOVL2,HACD2,HSD17B12
GO: Biological Process	GO:0009165	nucleotide biosynthetic process	0.0001948	0.006657	23	ELOVL5,ELOVL7,ADK,ACSL3,ACSL4,SCD,HPRT1,SDHC,SDHD,COX8A,ATP5MF,ATP5MG,PPT1,SLC35B2,NDUFA4,NDUFB5,PTGS2,ELOVL2,HACD2,TREM2,HSD17B12,TMSB4X,COX7A2L
GO: Biological Process	GO:0001890	placenta development	0.0002089	0.006991	14	TTPA,MET,MME,VCAM1,SPINT1,SPP1,ITGAV,PTGS2,ST14,BMP7,GJB2,GJB3,TMED2,RSPO3
GO: Biological Process	GO:0052126	movement in host environment	0.0002089	0.006991	14	CD46,TYRO3,MET,MRC1,CXADR,SPINT1,ITGA2,ITGAV,F11R,NECTIN2,NPC1,LAMP1,CLDN6,CD86
GO: Biological Process	GO:0042761	very long-chain fatty acid biosynthetic process	0.0002098	0.006991	4	ELOVL5,ELOVL7,ELOVL2,HACD2
GO: Biological Process	GO:0036109	alpha-linolenic acid metabolic process	0.0002098	0.006991	4	ELOVL5,FADS2,ELOVL2,FADS1
GO: Biological Process	GO:1901293	nucleoside phosphate biosynthetic process	0.0002165	0.00717	23	ELOVL5,ELOVL7,ADK,ACSL3,ACSL4,SCD,HPRT1,SDHC,SDHD,COX8A,ATP5MF,ATP5MG,PPT1,SLC35B2,NDUFA4,NDUFB5,PTGS2,ELOVL2,HACD2,TREM2,HSD17B12,TMSB4X,COX7A2L
GO: Biological Process	GO:0046165	alcohol biosynthetic process	0.0002246	0.007364	13	ACER3,MSMO1,SC5D,SCD,SPTLC1,ASAH1,EBP,SQLE,CYP51A1,SREBF1,GBA,DHCR7,P2RY1
GO: Biological Process	GO:0032527	protein exit from endoplasmic reticulum	0.0002251	0.007364	7	DERL1,EDEM2,TMEM30A,SELENOS,SURF4,SEC61B,DERL2
GO: Biological Process	GO:0001991	regulation of systemic arterial blood pressure by circulatory renin-angiotensin	0.0002449	0.007964	5	F2RL1,AGTR1,MME,CTSZ,ATP6AP2
GO: Biological Process	GO:0072594	establishment of protein localization to organelle	0.0002518	0.00814	31	RPL27,RPL34,RPS13,RPS17,RPS20,RPS21,RPS26,RPS27,RPS29,SRPRB,GRPEL2,SPCS3,UBE2D2,ZFAND6,MMP12,EI24,DDO,CSE1L,PSEN1,SPCS2,SREBF1,SSR3,PTGS2,TIMM8A,SEC61B,NUDT19,LAMP1,LAMP2,TRAM1,TNFRSF1A,M6PR
GO: Biological Process	GO:0043436	oxoacid metabolic process	0.0002548	0.008186	46	ELOVL5,ELOVL7,ACSL3,ACSL4,MGST2,MSMO1,LIPH,SCD,FADS2,PLA2G10,SLC25A17,ASNSD1,MCFD2,PLA2G3,PON2,DDO,IDH3A,PDPN,ASAH1,PSEN1,ECHDC1,PSMB3,AKR1D1,SREBF1,SLC35B2,DBI,PTGS2,ELOVL2,CEACAM1,LPGAT1,SLC23A1,ADIPOR2,NPC1,NUDT19,PRUNE2,OAZ1,HACD2,SLC7A7,LIPA,ADIPOR1,FADS1,ICMT,DHRS9,HSD17B12,CYP2U1,TNFRSF1A
GO: Biological Process	GO:0006082	organic acid metabolic process	0.0002566	0.008197	47	ELOVL5,ELOVL7,ACSL3,ACSL4,MGST2,MSMO1,LIPH,SCD,FADS2,PLA2G10,SLC25A17,ASNSD1,MCFD2,PLA2G3,PON2,DDO,IDH3A,PDPN,ASAH1,PSEN1,SPP1,ECHDC1,PSMB3,AKR1D1,SREBF1,SLC35B2,DBI,PTGS2,ELOVL2,CEACAM1,LPGAT1,SLC23A1,ADIPOR2,NPC1,NUDT19,PRUNE2,OAZ1,HACD2,SLC7A7,LIPA,ADIPOR1,FADS1,ICMT,DHRS9,HSD17B12,CYP2U1,TNFRSF1A
GO: Biological Process	GO:1901615	organic hydroxy compound metabolic process	0.0002586	0.008212	30	ACER3,TTPA,MSMO1,SC5D,SCD,HPRT1,FDX1,SPTLC1,NPC2,IDH3A,GDE1,PLPP1,PLPP3,ASAH1,EBP,SOAT1,LGMN,TTC39B,SQLE,CYP51A1,AKR1D1,SREBF1,GBA,SGPP1,DHCR7,NPC1,TGFB2,LIPA,P2RY1,DHRS9
GO: Biological Process	GO:0034976	response to endoplasmic reticulum stress	0.0002678	0.008452	19	BFAR,DNAJB9,SRPRB,SRPX,TMCO1,DERL1,EDEM2,SELENOS,MANF,SEC61B,TMED2,ERP29,DERL2,TOR1A,TMBIM6,TXNDC12,STT3B,TMEM33,RNF139
GO: Biological Process	GO:0006890	retrograde vesicle-mediated transport, Golgi to endoplasmic reticulum	0.0002699	0.00847	9	ERGIC2,PLPP3,SURF4,TMED2,LMAN2,TAPBP,KDELR2,TMED7,RER1
GO: Biological Process	GO:1905671	regulation of lysosome organization	0.000273	0.00847	3	LAPTM4B,TMEM106B,GRN
GO: Biological Process	GO:0034239	regulation of macrophage fusion	0.000273	0.00847	3	TYROBP,ADAM9,TREM2
GO: Biological Process	GO:0055082	cellular chemical homeostasis	0.000279	0.008606	41	RAMP3,F2RL1,TTPA,CLCN3,PIK3CB,CLN5,AGTR1,CCL8,TMCO1,VCAM1,SLC39A4,SLC40A1,TMEM106B,SLC30A5,SLC12A2,PPT1,MCU,ATP6V0A4,ATP12A,ATP1B3,SELENOT,ATP6V1C1,ATP6V0B,ATP6AP1,PSEN1,SPP1,TMEM165,DBI,ITGAV,SLC30A4,ATP6V0E1,GRN,SLC39A10,TMBIM6,TGFB2,SIDT2,EFNA5,P2RY1,ATP6AP2,LPAR2,ATP6V0A2
GO: Biological Process	GO:0046512	sphingosine biosynthetic process	0.0002881	0.008701	4	ACER3,SPTLC1,ASAH1,GBA
GO: Biological Process	GO:0046520	sphingoid biosynthetic process	0.0002881	0.008701	4	ACER3,SPTLC1,ASAH1,GBA
GO: Biological Process	GO:0030497	fatty acid elongation	0.0002881	0.008701	4	ELOVL5,ELOVL7,ELOVL2,HACD2
GO: Biological Process	GO:0062012	regulation of small molecule metabolic process	0.0002885	0.008701	26	ZMPSTE24,ELOVL5,ACSL4,SC5D,SCD,FAM3C,PLA2G3,TTC39B,SELENOS,PSEN1,SQLE,CYP51A1,PSMB3,SREBF1,DBI,PTGS2,CEACAM1,DHCR7,LPGAT1,ADIPOR2,OAZ1,SLC7A7,ADIPOR1,P2RY1,TREM2,TMSB4X
GO: Biological Process	GO:0033572	transferrin transport	0.0002905	0.008712	6	ATP6V0A4,ATP6V1C1,ATP6V0B,ATP6AP1,ATP6V0E1,ATP6V0A2
GO: Biological Process	GO:0006986	response to unfolded protein	0.000305	0.009096	14	BFAR,DNAJB9,SRPRB,COMP,DERL1,EDEM2,SELENOS,TM7SF3,MANF,TMED2,DERL2,TMBIM6,STT3B,TMEM33
GO: Biological Process	GO:0071827	plasma lipoprotein particle organization	0.0003114	0.009237	10	ACSL3,AGTR1,PLA2G10,NCEH1,PLA2G3,NPC2,MSR1,SOAT1,NPC1,LIPA
GO: Biological Process	GO:1905897	regulation of response to endoplasmic reticulum stress	0.0003205	0.009453	9	BFAR,DNAJB9,SELENOS,MANF,TMED2,ERP29,TMBIM6,TXNDC12,TMEM33
GO: Biological Process	GO:0046513	ceramide biosynthetic process	0.0003273	0.009602	8	UGCG,CERS2,SPTLC1,ASAH1,SPTSSA,GBA,CERS5,TNFRSF1A
GO: Biological Process	GO:0010742	macrophage derived foam cell differentiation	0.0003363	0.009814	6	AGTR1,PLA2G10,PLA2G3,MSR1,SOAT1,ITGAV
GO: Biological Process	GO:0032101	regulation of response to external stimulus	0.0003577	0.01032	47	ZMPSTE24,S100A14,F2RL1,TLR8,TYRO3,MET,TYROBP,MGST2,SEMA5B,AGTR1,PLA2G10,MMP12,MACIR,CERS2,PLA2G3,CLDN3,ENPP4,SLC12A2,MCU,PDGFD,IL1R1,CTSS,SEMA3E,LGMN,SELENOS,SPP1,PSMB3,SREBF1,GBA,IL20RB,SIRPA,ITGA2,PTGS2,CEACAM1,RNF125,PTPRJ,NECTIN2,PPP2R3C,NT5E,LAMP1,GRN,TREM2,TMSB4X,IL1RL1,TNFAIP6,TNFRSF1A,TNFRSF1B
GO: Biological Process	GO:0010243	response to organonitrogen compound	0.0003577	0.01032	47	RAMP3,DNAJB9,MGST1,MGST2,HPRT1,FDX1,AGTR1,MMP12,MMP13,VCAM1,DERL1,PDGFD,ATP6V0A4,EDEM2,LMBRD1,LGMN,ATP6V1C1,ATP6V0B,SELENOS,ATP6AP1,PSEN1,SLC38A9,SREBF1,ITGA2,GCNT1,CEACAM1,GGH,BMP7,GJB2,PTPRJ,SEC61B,GNAI1,ADIPOR2,NPC1,RAP1B,ATP6V0E1,DERL2,TOR1A,NCSTN,TMBIM6,RGS4,STT3B,ADIPOR1,P2RY1,TREM2,RNF139,ATP6V0A2
GO: Biological Process	GO:0097006	regulation of plasma lipoprotein particle levels	0.0003613	0.01034	10	ACSL3,AGTR1,PLA2G10,NCEH1,PLA2G3,NPC2,MSR1,SOAT1,NPC1,LIPA
GO: Biological Process	GO:1904645	response to amyloid-beta	0.0003628	0.01034	7	RAMP3,MMP12,MMP13,VCAM1,LGMN,PSEN1,TREM2
GO: Biological Process	GO:0036152	phosphatidylethanolamine acyl-chain remodeling	0.0003641	0.01034	5	PLBD1,PLA2G10,PLA2G3,MBOAT1,MBOAT2
GO: Biological Process	GO:0046486	glycerolipid metabolic process	0.0003776	0.01067	24	PLBD1,AGPAT5,ACSL3,ACSL4,CEPT1,PIGC,PIK3CB,LIPH,PLA2G10,PLA2G3,PRDX6,GDE1,PLPP1,PIGW,MBOAT1,PTDSS1,SREBF1,DBI,MBOAT2,LPGAT1,PIGK,PIGS,SLC44A2,SLC44A1
GO: Biological Process	GO:0015711	organic anion transport	0.0003843	0.01078	23	ACSL4,SLC35A2,PLA2G10,SLC25A17,ARL6IP5,PLA2G3,PDPN,SLC12A2,SLC16A13,PSEN1,SLC38A9,SLC35B2,CEACAM1,SLC38A1,SLC16A11,SLC23A1,SLC19A3,SLC7A7,LRRC8D,RGS4,SLC16A7,SLC33A1,SLC35B1
GO: Biological Process	GO:1902337	regulation of apoptotic process involved in morphogenesis	0.0003853	0.01078	4	BMP7,TGFB2,TNFRSF1A,TNFRSF1B
GO: Biological Process	GO:0090077	foam cell differentiation	0.0003876	0.01079	6	AGTR1,PLA2G10,PLA2G3,MSR1,SOAT1,ITGAV
GO: Biological Process	GO:0006612	protein targeting to membrane	0.0004002	0.01108	15	RPL27,RPL34,RPS13,RPS17,RPS20,RPS21,RPS26,RPS27,RPS29,SSR3,SEC61B,ACTR3,ICMT,ZDHHC6,TRAM1
GO: Biological Process	GO:0071825	protein-lipid complex subunit organization	0.0004175	0.0115	10	ACSL3,AGTR1,PLA2G10,NCEH1,PLA2G3,NPC2,MSR1,SOAT1,NPC1,LIPA
GO: Biological Process	GO:0060713	labyrinthine layer morphogenesis	0.0004379	0.012	5	VCAM1,SPINT1,ST14,BMP7,RSPO3
GO: Biological Process	GO:0019217	regulation of fatty acid metabolic process	0.0004483	0.01222	10	ELOVL5,ACSL4,PLA2G3,SREBF1,DBI,PTGS2,CEACAM1,LPGAT1,ADIPOR2,ADIPOR1
GO: Biological Process	GO:0061028	establishment of endothelial barrier	0.0004533	0.0123	7	F2RL1,CLDN3,RAP2C,F11R,RAP1B,MARVELD2,TNFRSF1A
GO: Biological Process	GO:0019752	carboxylic acid metabolic process	0.0004565	0.01232	44	ELOVL5,ELOVL7,ACSL3,ACSL4,MGST2,MSMO1,LIPH,SCD,FADS2,PLA2G10,SLC25A17,ASNSD1,MCFD2,PLA2G3,PON2,DDO,IDH3A,PDPN,ASAH1,PSEN1,ECHDC1,PSMB3,AKR1D1,SREBF1,DBI,PTGS2,ELOVL2,CEACAM1,LPGAT1,SLC23A1,ADIPOR2,NPC1,NUDT19,OAZ1,HACD2,SLC7A7,LIPA,ADIPOR1,FADS1,ICMT,DHRS9,HSD17B12,CYP2U1,TNFRSF1A
GO: Biological Process	GO:0034626	fatty acid elongation, polyunsaturated fatty acid	0.0004692	0.01237	3	ELOVL5,ELOVL7,ELOVL2
GO: Biological Process	GO:0034625	fatty acid elongation, monounsaturated fatty acid	0.0004692	0.01237	3	ELOVL5,ELOVL7,ELOVL2
GO: Biological Process	GO:0019368	fatty acid elongation, unsaturated fatty acid	0.0004692	0.01237	3	ELOVL5,ELOVL7,ELOVL2
GO: Biological Process	GO:0019367	fatty acid elongation, saturated fatty acid	0.0004692	0.01237	3	ELOVL5,ELOVL7,ELOVL2
GO: Biological Process	GO:0045017	glycerolipid biosynthetic process	0.0004698	0.01237	17	AGPAT5,ACSL3,ACSL4,CEPT1,PIGC,PIK3CB,LIPH,PLA2G10,PLPP1,PIGW,PTDSS1,SREBF1,LPGAT1,PIGK,PIGS,SLC44A2,SLC44A1
GO: Biological Process	GO:0071816	tail-anchored membrane protein insertion into ER membrane	0.0005039	0.0132	4	GET1,EMC6,EMC7,EMC3
GO: Biological Process	GO:0006637	acyl-CoA metabolic process	0.0005155	0.01324	10	ELOVL5,ELOVL7,ACSL3,ACSL4,SCD,PPT1,DBI,ELOVL2,HACD2,HSD17B12
GO: Biological Process	GO:0035383	thioester metabolic process	0.0005155	0.01324	10	ELOVL5,ELOVL7,ACSL3,ACSL4,SCD,PPT1,DBI,ELOVL2,HACD2,HSD17B12
GO: Biological Process	GO:1901264	carbohydrate derivative transport	0.000521	0.01324	9	SLC35A2,PLA2G10,SLC35E3,SLC25A17,SLC37A3,NPC2,SLC35B2,SLC33A1,SLC35B1
GO: Biological Process	GO:0006695	cholesterol biosynthetic process	0.0005218	0.01324	8	MSMO1,SC5D,SCD,EBP,SQLE,CYP51A1,SREBF1,DHCR7
GO: Biological Process	GO:1902653	secondary alcohol biosynthetic process	0.0005218	0.01324	8	MSMO1,SC5D,SCD,EBP,SQLE,CYP51A1,SREBF1,DHCR7
GO: Biological Process	GO:0045723	positive regulation of fatty acid biosynthetic process	0.0005226	0.01324	5	ELOVL5,PLA2G3,SREBF1,PTGS2,LPGAT1
GO: Biological Process	GO:0090383	phagosome acidification	0.0005226	0.01324	5	ATP6V0A4,ATP6V1C1,ATP6V0B,ATP6V0E1,ATP6V0A2
GO: Biological Process	GO:0042157	lipoprotein metabolic process	0.0005441	0.01367	11	PIGC,UGCG,PPT1,PIGW,CTSD,GBA,DBI,ITGAV,PIGK,PIGS,ZDHHC6
GO: Biological Process	GO:0090150	establishment of protein localization to membrane	0.0005446	0.01367	21	RPL27,RPL34,RPS13,RPS17,RPS20,RPS21,RPS26,RPS27,RPS29,ACSL3,GET1,EMC6,EMC7,EMC3,SSR3,SEC61B,NPC1,ACTR3,ICMT,ZDHHC6,TRAM1
GO: Biological Process	GO:0051180	vitamin transport	0.0005788	0.01447	6	TTPA,PDPN,LMBRD1,SLC23A1,TCN2,SLC19A3
GO: Biological Process	GO:0030001	metal ion transport	0.000601	0.01495	27	RAMP3,ZMPSTE24,MAGT1,CCL8,TMCO1,NDFIP2,SLC39A4,SLC40A1,SLC30A5,MCU,TSPAN13,SARAF,ATP12A,ATP1B3,PSEN1,SLC39A1,SLC39A11,TMEM165,DBI,ITGAV,SLC30A4,PTGS2,NIPA2,SLC39A10,TMBIM6,RGS4,TGFB2
GO: Biological Process	GO:0030970	retrograde protein transport, ER to cytosol	0.0006189	0.01525	5	DERL1,EDEM2,SELENOS,SEC61B,DERL2
GO: Biological Process	GO:1903513	endoplasmic reticulum to cytosol transport	0.0006189	0.01525	5	DERL1,EDEM2,SELENOS,SEC61B,DERL2
GO: Biological Process	GO:1904748	regulation of apoptotic process involved in development	0.0006463	0.01586	4	BMP7,TGFB2,TNFRSF1A,TNFRSF1B
GO: Biological Process	GO:0050727	regulation of inflammatory response	0.000696	0.017	22	TYRO3,MGST2,AGTR1,PLA2G10,MACIR,PLA2G3,IL1R1,CTSS,SELENOS,GBA,IL20RB,SIRPA,ITGA2,PTGS2,NT5E,GRN,TREM2,TMSB4X,IL1RL1,TNFAIP6,TNFRSF1A,TNFRSF1B
GO: Biological Process	GO:0034109	homotypic cell-cell adhesion	0.0007046	0.01713	9	TYRO3,PIK3CB,COMP,PDPN,PLPP3,CXADR,CEACAM1,F11R,DSG2
GO: Biological Process	GO:0036151	phosphatidylcholine acyl-chain remodeling	0.0007279	0.01762	5	PLBD1,PLA2G10,PLA2G3,DBI,MBOAT2
GO: Biological Process	GO:0034238	macrophage fusion	0.0007371	0.01768	3	TYROBP,ADAM9,TREM2
GO: Biological Process	GO:0015871	choline transport	0.0007371	0.01768	3	PSEN1,SLC44A2,SLC44A1
GO: Biological Process	GO:0034113	heterotypic cell-cell adhesion	0.0007596	0.01814	7	VCAM1,CXADR,PERP,SIRPA,ITGAV,BMP7,DSG2
GO: Biological Process	GO:0007033	vacuole organization	0.000778	0.0185	13	LAPTM4B,CLN5,SRPX,TMEM106B,PPT1,CTSD,EMC6,PSEN1,TMEM165,GBA,TMEM41B,GRN,ATP6AP2
GO: Biological Process	GO:0001885	endothelial cell development	0.0008007	0.01896	8	F2RL1,MET,CLDN3,RAP2C,F11R,RAP1B,MARVELD2,TNFRSF1A
GO: Biological Process	GO:0001990	regulation of systemic arterial blood pressure by hormone	0.0008362	0.01971	6	F2RL1,AGTR1,MME,CTSZ,ECE1,ATP6AP2
GO: Biological Process	GO:0006888	endoplasmic reticulum to Golgi vesicle-mediated transport	0.0008498	0.01994	14	BET1,ERGIC2,MCFD2,CNIH4,CTSZ,TMED2,LMAN2,ERP29,KDELR2,TMED1,TMED5,CAPZA2,TMED7,RNF139
GO: Biological Process	GO:0016126	sterol biosynthetic process	0.0008687	0.0203	8	MSMO1,SC5D,SCD,EBP,SQLE,CYP51A1,SREBF1,DHCR7
GO: Biological Process	GO:0060669	embryonic placenta morphogenesis	0.0009882	0.02299	5	VCAM1,SPINT1,ST14,BMP7,RSPO3
GO: Biological Process	GO:1901698	response to nitrogen compound	0.0009941	0.02303	48	RAMP3,DNAJB9,MGST1,MGST2,HPRT1,FDX1,AGTR1,MMP12,MMP13,VCAM1,DERL1,PDGFD,ATP6V0A4,EDEM2,LMBRD1,LGMN,ATP6V1C1,ATP6V0B,SELENOS,ATP6AP1,PSEN1,SLC38A9,SREBF1,ITGA2,GCNT1,ITGAV,CEACAM1,GGH,BMP7,GJB2,PTPRJ,SEC61B,GNAI1,ADIPOR2,NPC1,RAP1B,ATP6V0E1,DERL2,TOR1A,NCSTN,TMBIM6,RGS4,STT3B,ADIPOR1,P2RY1,TREM2,RNF139,ATP6V0A2
GO: Biological Process	GO:0010744	positive regulation of macrophage derived foam cell differentiation	0.001013	0.02336	4	AGTR1,PLA2G10,PLA2G3,MSR1
GO: Biological Process	GO:0032368	regulation of lipid transport	0.001038	0.02384	13	ACSL4,AGTR1,PLA2G10,ARL6IP5,PLA2G3,SLC12A2,TMEM30A,TTC39B,PRELID1,PSEN1,SPP1,DBI,ITGAV
GO: Biological Process	GO:0006508	proteolysis	0.001047	0.02385	67	CPA4,ZMPSTE24,RNF13,BFAR,CD46,DNAJB9,SPCS3,UBE2D2,CLN5,MME,MMP12,MMP13,COMP,DERL1,ARL6IP5,ANAPC11,NDFIP2,CPD,CLDN3,XPNPEP2,IFI27,RNF167,TMEM208,EDEM2,CST3,CTSD,IFI6,CTSS,CTSZ,LGMN,RNF130,SELENOS,PRELID1,PSEN1,SPINT1,PLGRKT,ADAM9,PSMB3,SPCS2,PERP,GBA,SEC11C,ADAM28,PTGS2,ST14,GGH,RNF125,SEC61B,PRPF19,C2,PIGK,DERL2,TOR1A,GRN,NCSTN,ECE1,RFX4,STT3B,SPPL2A,ATP6AP2,SEC11A,TREM2,TNFRSF1B,RNF139,SERPINA5,…
GO: Biological Process	GO:1903573	negative regulation of response to endoplasmic reticulum stress	0.001052	0.02385	6	BFAR,DNAJB9,SELENOS,TMED2,TMBIM6,TXNDC12
GO: Biological Process	GO:0090382	phagosome maturation	0.001052	0.02385	6	SRPX,ATP6V0A4,ATP6V1C1,ATP6V0B,ATP6V0E1,ATP6V0A2
GO: Biological Process	GO:0010256	endomembrane system organization	0.001076	0.02431	29	ZMPSTE24,LAPTM4B,RTN3,CLCN3,UGCG,PLA2G3,GET1,EMC6,TLCD1,EMC7,EMC3,PERP,ST14,LIPM,SURF4,A4GALT,NECTIN2,TMED2,LMAN2,REEP5,DOP1B,TMED1,DSG2,TMED5,TOR1A,TMED7,TMEM33,TGFB2,TRAM1
GO: Biological Process	GO:0018243	protein O-linked glycosylation via threonine	0.001086	0.02442	3	GALNT1,GALNT2,GALNT3
GO: Biological Process	GO:0010743	regulation of macrophage derived foam cell differentiation	0.001142	0.02533	5	AGTR1,PLA2G10,PLA2G3,MSR1,ITGAV
GO: Biological Process	GO:0003081	regulation of systemic arterial blood pressure by renin-angiotensin	0.001142	0.02533	5	F2RL1,AGTR1,MME,CTSZ,ATP6AP2
GO: Biological Process	GO:0036503	ERAD pathway	0.001151	0.02533	9	DNAJB9,DERL1,EDEM2,SELENOS,SEC61B,DERL2,TOR1A,STT3B,RNF139
GO: Biological Process	GO:0033865	nucleoside bisphosphate metabolic process	0.001154	0.02533	11	ELOVL5,ELOVL7,ACSL3,ACSL4,SCD,PPT1,SLC35B2,DBI,ELOVL2,HACD2,HSD17B12
GO: Biological Process	GO:0033875	ribonucleoside bisphosphate metabolic process	0.001154	0.02533	11	ELOVL5,ELOVL7,ACSL3,ACSL4,SCD,PPT1,SLC35B2,DBI,ELOVL2,HACD2,HSD17B12
GO: Biological Process	GO:0034032	purine nucleoside bisphosphate metabolic process	0.001154	0.02533	11	ELOVL5,ELOVL7,ACSL3,ACSL4,SCD,PPT1,SLC35B2,DBI,ELOVL2,HACD2,HSD17B12
GO: Biological Process	GO:0050900	leukocyte migration	0.001201	0.02624	26	S100A14,F2RL1,PIK3CB,CCL8,VCAM1,SLC12A2,MCU,PDGFD,IL1R1,ATP1B3,CXADR,LGMN,SPP1,GBA,SIRPA,ITGA2,GCNT1,ITGAV,CEACAM1,F11R,PTPRJ,SLC7A7,TGFB2,TREM2,CD48,EPCAM
GO: Biological Process	GO:0044272	sulfur compound biosynthetic process	0.001249	0.02718	13	ELOVL5,ELOVL7,ACSL3,ACSL4,MGST1,MGST2,SCD,PPT1,SLC35B2,ELOVL2,XYLT2,HACD2,HSD17B12
GO: Biological Process	GO:0006954	inflammatory response	0.001258	0.02726	36	ACER3,PLD3,F2RL1,TLR8,TYRO3,MGST2,AGTR1,PLA2G10,CCL8,MACIR,VCAM1,PLA2G3,IL1R1,CTSS,SELENOS,PLGRKT,SPP1,GBA,IL20RB,SIRPA,ITGA2,ITGAV,IL18R1,PTGS2,F11R,NT5E,GRN,NFAM1,LIPA,CD14,TREM2,TMSB4X,IL1RL1,TNFAIP6,TNFRSF1A,TNFRSF1B
GO: Biological Process	GO:0031347	regulation of defense response	0.00128	0.02756	33	ZMPSTE24,F2RL1,TLR8,TYRO3,TYROBP,MGST2,AGTR1,PLA2G10,MMP12,MACIR,PLA2G3,IL1R1,CTSS,SELENOS,PSMB3,SREBF1,GBA,IL20RB,SIRPA,ITGA2,PTGS2,CEACAM1,RNF125,NECTIN2,NT5E,LAMP1,GRN,TREM2,TMSB4X,IL1RL1,TNFAIP6,TNFRSF1A,TNFRSF1B
GO: Biological Process	GO:0006826	iron ion transport	0.001281	0.02756	8	PGRMC2,SLC40A1,ATP6V0A4,ATP6V1C1,ATP6V0B,ATP6AP1,ATP6V0E1,ATP6V0A2
GO: Biological Process	GO:0006886	intracellular protein transport	0.001305	0.02796	58	RPL27,MAGOH,RPL34,RAMP3,RPS13,RPS17,RPS20,RPS21,RPS26,RPS27,RPS29,SRPRB,GRPEL2,SPCS3,UBE2D2,ZFAND6,MMP12,MACIR,VDAC3,APPBP2,DERL1,PLA2G3,EI24,DDO,IFI27,CSE1L,EDEM2,TMEM30A,RAB21,RIMS2,SNX2,SELENOS,PSEN1,SPCS2,SREBF1,SSR3,PTGS2,TIMM8A,SURF4,SEC61B,TMED2,ERP29,NUDT19,TMED1,RAB17,TMED5,DERL2,TMED7,LAMP2,OAZ1,RFX4,ACTR3,TXNDC15,ICMT,ZDHHC6,TRAM1,TNFRSF1A,M6PR
GO: Biological Process	GO:0035967	cellular response to topologically incorrect protein	0.00132	0.02808	12	BFAR,DNAJB9,SRPRB,DERL1,SELENOS,TM7SF3,TMED2,DERL2,TOR1A,TMBIM6,TMEM33,UBE2W
GO: Biological Process	GO:0090181	regulation of cholesterol metabolic process	0.001321	0.02808	7	SC5D,SCD,TTC39B,SQLE,CYP51A1,SREBF1,DHCR7
GO: Biological Process	GO:0016236	macroautophagy	0.00137	0.02901	18	SPTLC1,EI24,CTSD,EMC6,ATP6V1C1,ATP6V0B,PSEN1,SLC38A9,GBA,QSOX1,TMEM41B,NPC1,ATP6V0E1,TOMM6,LAMP1,LAMP2,TREM2,ATP6V0A2
GO: Biological Process	GO:1905952	regulation of lipid localization	0.00143	0.03015	14	ACSL4,AGTR1,PLA2G10,ARL6IP5,PLA2G3,MSR1,SLC12A2,TMEM30A,TTC39B,PRELID1,PSEN1,SPP1,DBI,ITGAV
GO: Biological Process	GO:1900221	regulation of amyloid-beta clearance	0.001504	0.0315	4	TTPA,PLA2G3,CYP51A1,TREM2
GO: Biological Process	GO:0046942	carboxylic acid transport	0.001515	0.0315	18	ACSL4,PLA2G10,ARL6IP5,PLA2G3,PDPN,SLC12A2,SLC16A13,PSEN1,SLC38A9,CEACAM1,SLC38A1,SLC16A11,SLC23A1,SLC19A3,SLC7A7,LRRC8D,RGS4,SLC16A7
GO: Biological Process	GO:0060075	regulation of resting membrane potential	0.001523	0.0315	3	PSEN1,KCNK1,TREM2
GO: Biological Process	GO:0045050	protein insertion into ER membrane by stop-transfer membrane-anchor sequence	0.001523	0.0315	3	EMC6,EMC7,EMC3
GO: Biological Process	GO:0018242	protein O-linked glycosylation via serine	0.001523	0.0315	3	GALNT1,GALNT2,GALNT3
GO: Biological Process	GO:0006687	glycosphingolipid metabolic process	0.001567	0.03229	7	UGCG,ASAH1,B3GALNT1,GBA,NEU1,SUMF1,A4GALT
GO: Biological Process	GO:0001942	hair follicle development	0.001592	0.03268	9	ZMPSTE24,FZD6,PLA2G10,DKK4,PSEN1,DBI,PTGS2,TGFB2,LRP4
GO: Biological Process	GO:0045540	regulation of cholesterol biosynthetic process	0.001607	0.03274	6	SC5D,SCD,SQLE,CYP51A1,SREBF1,DHCR7
GO: Biological Process	GO:0106118	regulation of sterol biosynthetic process	0.001607	0.03274	6	SC5D,SCD,SQLE,CYP51A1,SREBF1,DHCR7
GO: Biological Process	GO:0061919	process utilizing autophagic mechanism	0.001662	0.0336	26	ZMPSTE24,MET,PIK3CB,SRPX,TM9SF1,SPTLC1,EI24,TMEM208,CTSD,EMC6,ATP6V1C1,ATP6V0B,PSEN1,SLC38A9,SREBF1,GBA,QSOX1,TMEM41B,NPC1,ATP6V0E1,TOMM6,LAMP1,LAMP2,TMBIM6,TREM2,ATP6V0A2
GO: Biological Process	GO:0006914	autophagy	0.001662	0.0336	26	ZMPSTE24,MET,PIK3CB,SRPX,TM9SF1,SPTLC1,EI24,TMEM208,CTSD,EMC6,ATP6V1C1,ATP6V0B,PSEN1,SLC38A9,SREBF1,GBA,QSOX1,TMEM41B,NPC1,ATP6V0E1,TOMM6,LAMP1,LAMP2,TMBIM6,TREM2,ATP6V0A2
GO: Biological Process	GO:0019915	lipid storage	0.001713	0.0345	8	PLA2G10,MSR1,SOAT1,TTC39B,SQLE,SREBF1,GBA,ITGAV
GO: Biological Process	GO:0006624	vacuolar protein processing	0.001753	0.0346	2	TMEM208,LGMN
GO: Biological Process	GO:0043686	co-translational protein modification	0.001753	0.0346	2	STT3A,STT3B
GO: Biological Process	GO:0038016	insulin receptor internalization	0.001753	0.0346	2	LMBRD1,CEACAM1
GO: Biological Process	GO:1901731	positive regulation of platelet aggregation	0.001753	0.0346	2	PDPN,F11R
GO: Biological Process	GO:0045216	cell-cell junction organization	0.001754	0.0346	14	F2RL1,CLDN3,CLDN7,OCLN,CXADR,PERP,GJB2,F11R,NECTIN2,DSG2,CLDN8,CLDN6,TGFB2,MARVELD2
GO: Biological Process	GO:0043604	amide biosynthetic process	0.001756	0.0346	38	RPL27,MAGOH,RPL34,RPS13,ELOVL5,RPS17,RPS20,RPS21,RPS26,RPS27,RPS29,ELOVL7,ACSL3,ACSL4,MGST2,MRPS17,SCD,UGCG,EIF4E2,CERS2,SPTLC1,PPT1,ASAH1,MRPS33,SELENOT,SPTSSA,GBA,ITGA2,SSR3,ELOVL2,SEC61B,TMED2,HACD2,CERS5,TRAM1,HSD17B12,TNFRSF1A,RNF139
GO: Biological Process	GO:0010565	regulation of cellular ketone metabolic process	0.001778	0.0349	13	ELOVL5,ACSL4,PLA2G3,PSMB3,SREBF1,DBI,PTGS2,CEACAM1,LPGAT1,ADIPOR2,OAZ1,SLC7A7,ADIPOR1
GO: Biological Process	GO:0043651	linoleic acid metabolic process	0.001804	0.03502	4	ELOVL5,FADS2,ELOVL2,FADS1
GO: Biological Process	GO:0046514	ceramide catabolic process	0.001804	0.03502	4	ACER3,ASAH1,GBA,NEU1
GO: Biological Process	GO:0031293	membrane protein intracellular domain proteolysis	0.001804	0.03502	4	PSEN1,ADAM9,NCSTN,SPPL2A
GO: Biological Process	GO:0006497	protein lipidation	0.001837	0.03541	8	PIGC,UGCG,PIGW,GBA,DBI,PIGK,PIGS,ZDHHC6
GO: Biological Process	GO:0050728	negative regulation of inflammatory response	0.001837	0.03541	12	TYRO3,PLA2G10,MACIR,SELENOS,GBA,IL20RB,SIRPA,NT5E,GRN,TNFAIP6,TNFRSF1A,TNFRSF1B
GO: Biological Process	GO:0003158	endothelium development	0.001843	0.03541	11	F2RL1,MET,CLDN3,SLC40A1,PDPN,RAP2C,CEACAM1,F11R,RAP1B,MARVELD2,TNFRSF1A
GO: Biological Process	GO:0022404	molting cycle process	0.001916	0.03655	9	ZMPSTE24,FZD6,PLA2G10,DKK4,PSEN1,DBI,PTGS2,TGFB2,LRP4
GO: Biological Process	GO:0022405	hair cycle process	0.001916	0.03655	9	ZMPSTE24,FZD6,PLA2G10,DKK4,PSEN1,DBI,PTGS2,TGFB2,LRP4
GO: Biological Process	GO:0035633	maintenance of blood-brain barrier	0.001936	0.03667	5	CLDN3,SLC12A2,OCLN,PTGS2,F11R
GO: Biological Process	GO:1901136	carbohydrate derivative catabolic process	0.001936	0.03667	13	MGAT1,HPRT1,MMP12,ENPP4,EDEM2,CST3,FUCA1,GBA,LYVE1,NEU1,GNS,NT5E,STT3B
GO: Biological Process	GO:0051701	biological process involved in interaction with host	0.001976	0.0373	14	CD46,TYRO3,MET,MRC1,CXADR,SPINT1,ITGA2,ITGAV,F11R,NECTIN2,NPC1,LAMP1,CLDN6,CD86
GO: Biological Process	GO:0051050	positive regulation of transport	0.002028	0.03814	42	RAMP3,F2RL1,ACSL3,ACSL4,MET,PLA2G10,MMP13,PLA2G3,SLC12A2,PPT1,MCU,EDEM2,TMEM30A,OCLN,ATP1B3,RAB21,CTSS,SELENOT,ATP6AP1,PRELID1,PSEN1,SPP1,ADAM9,TM7SF3,DBI,SIRPA,ITGA2,PTGS2,PTPRJ,C2,LMAN2,ADIPOR2,TOR1A,LAMP1,OAZ1,ACTR3,TGFB2,CD14,P2RY1,TREM2,TMSB4X,TNFRSF1A
GO: Biological Process	GO:0098773	skin epidermis development	0.002035	0.03814	9	ZMPSTE24,FZD6,PLA2G10,DKK4,PSEN1,DBI,PTGS2,TGFB2,LRP4
GO: Biological Process	GO:0042447	hormone catabolic process	0.002056	0.03841	3	SPP1,ECE1,HSD17B11
GO: Biological Process	GO:0042303	molting cycle	0.002085	0.03867	10	ZMPSTE24,FZD6,PLA2G10,DKK4,PSEN1,DBI,PTGS2,MPZL3,TGFB2,LRP4
GO: Biological Process	GO:0042633	hair cycle	0.002085	0.03867	10	ZMPSTE24,FZD6,PLA2G10,DKK4,PSEN1,DBI,PTGS2,MPZL3,TGFB2,LRP4
GO: Biological Process	GO:0034312	diol biosynthetic process	0.002142	0.03959	4	ACER3,SPTLC1,ASAH1,GBA
GO: Biological Process	GO:0006658	phosphatidylserine metabolic process	0.002185	0.04025	5	PLA2G10,PLA2G3,MBOAT1,PTDSS1,MBOAT2
GO: Biological Process	GO:0045446	endothelial cell differentiation	0.002198	0.04037	10	F2RL1,MET,CLDN3,PDPN,RAP2C,CEACAM1,F11R,RAP1B,MARVELD2,TNFRSF1A
GO: Biological Process	GO:1901652	response to peptide	0.002216	0.04054	26	RAMP3,AGTR1,MMP12,MMP13,VCAM1,ATP6V0A4,LMBRD1,LGMN,ATP6V1C1,ATP6V0B,SELENOS,ATP6AP1,PSEN1,SREBF1,GCNT1,CEACAM1,GGH,BMP7,GJB2,PTPRJ,GNAI1,RAP1B,ATP6V0E1,ADIPOR1,TREM2,ATP6V0A2
GO: Biological Process	GO:0044257	cellular protein catabolic process	0.00224	0.04074	34	ZMPSTE24,LAPTM4B,RNF13,BFAR,DNAJB9,UBE2D2,ATRAID,DERL1,ANAPC11,NDFIP2,IFI27,TMEM106B,RNF167,EDEM2,CTSS,CTSZ,LGMN,RNF130,SELENOS,PSEN1,PSMB3,GBA,RNF125,SEC61B,PRPF19,DERL2,TOR1A,GRN,LAMP2,STT3B,TREM2,RNF139,UBE2W,MAD2L1
GO: Biological Process	GO:1905039	carboxylic acid transmembrane transport	0.002242	0.04074	11	ARL6IP5,PDPN,PSEN1,SLC38A9,SLC38A1,SLC16A11,SLC23A1,SLC7A7,LRRC8D,RGS4,SLC16A7
GO: Biological Process	GO:0031348	negative regulation of defense response	0.002281	0.04128	15	TYRO3,PLA2G10,MMP12,MACIR,SELENOS,GBA,IL20RB,SIRPA,CEACAM1,RNF125,NT5E,GRN,TNFAIP6,TNFRSF1A,TNFRSF1B
GO: Biological Process	GO:0006694	steroid biosynthetic process	0.002287	0.04128	13	MSMO1,SC5D,SCD,FDX1,ASAH1,EBP,SQLE,CYP51A1,AKR1D1,SREBF1,DHCR7,HSD17B12,HSD17B11
GO: Biological Process	GO:0043588	skin development	0.002333	0.04199	22	ZMPSTE24,FZD6,MET,UGCG,PLA2G10,COMP,ASAH1,DKK4,PSEN1,ADAM9,PERP,GBA,DBI,ITGA2,PTGS2,ST14,SGPP1,GJB3,LIPM,DSG2,TGFB2,LRP4
GO: Biological Process	GO:1903825	organic acid transmembrane transport	0.002352	0.04208	11	ARL6IP5,PDPN,PSEN1,SLC38A9,SLC38A1,SLC16A11,SLC23A1,SLC7A7,LRRC8D,RGS4,SLC16A7
GO: Biological Process	GO:0015849	organic acid transport	0.002361	0.04208	19	ACSL3,ACSL4,PLA2G10,SLC25A17,ARL6IP5,PLA2G3,PDPN,SLC12A2,PSEN1,SLC38A9,CEACAM1,SLC38A1,SLC16A11,SLC23A1,SLC19A3,SLC7A7,LRRC8D,RGS4,SLC16A7
GO: Biological Process	GO:0003044	regulation of systemic arterial blood pressure mediated by a chemical signal	0.002362	0.04208	6	F2RL1,AGTR1,MME,CTSZ,ECE1,ATP6AP2
GO: Biological Process	GO:0080134	regulation of response to stress	0.002416	0.04278	56	ZMPSTE24,RNF13,BFAR,DNAJB9,F2RL1,TLR8,TYRO3,MET,TYROBP,MGST2,PIK3CB,AGTR1,PLA2G10,MMP12,MACIR,CERS2,ARL6IP5,PLA2G3,CLDN3,ENPP4,SLC12A2,PLPP3,OCLN,IL1R1,CTSS,SELENOS,SPP1,PSMB3,SREBF1,GBA,IL20RB,SIRPA,ITGA2,PTGS2,CEACAM1,BMP7,RNF125,NECTIN2,MANF,TMED2,ERP29,NT5E,LAMP1,GRN,TMBIM6,TXNDC12,TMEM33,TGFB2,ICMT,PRDX1,TREM2,TMSB4X,IL1RL1,TNFAIP6,TNFRSF1A,TNFRSF1B
GO: Biological Process	GO:1901700	response to oxygen-containing compound	0.002417	0.04278	65	RAMP3,SIGMAR1,S100A14,MET,MGST1,MGST2,SCD,FDX1,AGTR1,MMP12,MMP13,VCAM1,MRC1,LITAF,CLDN3,CLDN7,PRDX6,PDGFD,ATP6V0A4,EDEM2,LMBRD1,SELENOT,LGMN,ATP6V1C1,ATP6V0B,SELENOS,ATP6AP1,PSEN1,SPP1,SLC38A9,ADAM9,SREBF1,GBA,SIRPA,ITGA2,GCNT1,ITGAV,PTGS2,CEACAM1,GGH,BMP7,GJB2,GJB3,PTPRJ,GNAI1,ADIPOR2,RAP1B,ATP6V0E1,DSG2,GRN,NCSTN,TMBIM6,RGS4,TGFB2,SIDT2,ADIPOR1,EFNA5,CD14,P2RY1,CD86,PRDX1,TREM2,SDF4,TNFRSF1B,AT…
GO: Biological Process	GO:1901222	regulation of NIK/NF-kappaB signaling	0.002428	0.04282	9	LITAF,IL18R1,BMP7,ADIPOR1,CD14,CD86,PRDX1,TREM2,TMSB4X
GO: Biological Process	GO:0032103	positive regulation of response to external stimulus	0.002446	0.04301	25	S100A14,F2RL1,TLR8,MET,TYROBP,MGST2,AGTR1,MMP12,PLA2G3,MCU,PDGFD,CTSS,LGMN,PSMB3,SREBF1,ITGA2,PTGS2,PTPRJ,NECTIN2,LAMP1,GRN,TREM2,TMSB4X,IL1RL1,TNFRSF1A
GO: Biological Process	GO:0001817	regulation of cytokine production	0.002463	0.04316	36	LAPTM4B,CD46,PLD3,F2RL1,TLR8,MET,TYROBP,PLA2G10,MMP12,MACIR,LITAF,PLA2G3,IL1R1,SELENOS,PSEN1,GBA,IL20RB,SIRPA,ITGAV,IL18R1,PTGS2,CEACAM1,RNF125,F11R,PTPRJ,TWSG1,NFAM1,TGFB2,CD14,CD86,ATP6AP2,TREM2,TMSB4X,IL1RL1,TNFRSF1A,TNFRSF1B
GO: Biological Process	GO:0042158	lipoprotein biosynthetic process	0.002567	0.04485	8	PIGC,UGCG,PIGW,GBA,DBI,PIGK,PIGS,ZDHHC6
GO: Biological Process	GO:0009395	phospholipid catabolic process	0.002587	0.04504	6	PLBD1,PLA2G10,PRDX6,GDE1,SMPDL3A,PLBD2
GO: Biological Process	GO:0002003	angiotensin maturation	0.002692	0.04673	3	MME,CTSZ,ATP6AP2
GO: Biological Process	GO:1903793	positive regulation of anion transport	0.002855	0.04939	26	F2RL1,ACSL3,ACSL4,MET,PLA2G10,MMP13,PLA2G3,SLC12A2,MCU,EDEM2,TMEM30A,OCLN,SELENOT,PRELID1,PSEN1,SPP1,ADAM9,TM7SF3,DBI,PTGS2,ADIPOR2,OAZ1,ACTR3,TGFB2,TREM2,TNFRSF1A
GO: Biological Process	GO:0072521	purine-containing compound metabolic process	0.002876	0.0496	27	ELOVL5,ELOVL7,ADK,ACSL3,ACSL4,SCD,HPRT1,SDHC,SDHD,COX8A,ATP5MF,ENPP4,ATP5MG,PPT1,PSEN1,SLC35B2,DBI,NDUFA4,NDUFB5,ELOVL2,NT5E,HACD2,ICMT,TREM2,HSD17B12,TMSB4X,COX7A2L

## Sheet: Downregulated Pathways
S23. ToppGene pathway output for genes with decreased expression levels in Male embryos from IVP compared to AI on d32
Category	ID	Name	Source	p-value	q-value FDR B&H	Hit Count in Query List	Hit in Query List
Pathway	99052	Lysosome	BioSystems: KEGG	3.313e-18	6.836e-15	28	MAN2B1,LAPTM4B,CLN5,LITAF,NPC2,PPT1,ASAH1,ATP6V0A4,FUCA1,CTSD,CTSS,CTSZ,LGMN,LAPTM4A,ATP6V0B,ATP6AP1,CD164,GBA,NEU1,SUMF1,GNS,DNASE2,NPC1,LAMP1,LAMP2,LIPA,M6PR,ATP6V0A2
Pathway	M11266	Lysosome	MSigDB C2 BIOCARTA (v7.3)	2.326e-17	2.399e-14	27	MAN2B1,LAPTM4B,CLN5,NPC2,PPT1,ASAH1,ATP6V0A4,FUCA1,CTSD,CTSS,CTSZ,LGMN,LAPTM4A,ATP6V0B,ATP6AP1,CD164,GBA,NEU1,SUMF1,GNS,DNASE2,NPC1,LAMP1,LAMP2,LIPA,M6PR,ATP6V0A2
Pathway	1270001	Metabolism of lipids and lipoproteins	BioSystems: REACTOME	8.224e-14	5.655e-11	63	PLBD1,AGPAT5,ACER3,ELOVL5,PLD3,ELOVL7,ACSL3,ACSL4,CEPT1,MSMO1,SC5D,PIK3CB,LIPH,SCD,FDX1,UGCG,FADS2,PLA2G10,NCEH1,SLC25A17,CERS2,PLA2G3,SPTLC1,PON2,NPC2,GDE1,PPT1,PLPP1,PLPP3,ASAH1,EBP,SOAT1,B3GALNT1,SPTSSA,MBOAT1,SQLE,CYP51A1,AKR1D1,PTDSS1,SREBF1,GBA,DBI,MBOAT2,PTGS2,ELOVL2,SGPP1,NEU1,LIPM,DHCR7,SUMF1,LPGAT1,NPC1,NUDT19,GLIPR1,SLC44A2,HACD2,CERS5,LIPA,SLC44A1,FADS1,HSD17B12,CYP2U1,HSD17B11
Pathway	M39853	Cholesterol metabolism (includes both Bloch and Kandutsch-Russell pathways)	MSigDB C2 BIOCARTA (v7.3)	1.128e-12	5.817e-10	15	ELOVL5,ACSL3,ACSL4,MSMO1,SC5D,SCD,FADS2,EBP,SOAT1,SQLE,CYP51A1,SREBF1,ELOVL2,DHCR7,FADS1
Pathway	1457780	Neutrophil degranulation	BioSystems: REACTOME	1.48e-12	6.108e-10	45	MAN2B1,MAGT1,TYROBP,MGST1,QPCT,MME,NPC2,ENPP4,PRDX6,ASAH1,RNASET2,CST3,TMEM30A,FUCA1,RAP2C,CTSD,CTSS,CTSZ,PSEN1,SIRPA,CREG1,ITGAV,DDOST,TMBIM1,CEACAM1,GGH,CMTM6,QSOX1,NEU1,PTPRJ,SURF4,GNS,GLIPR1,RAP1B,SLC44A2,LAMP1,GRN,LAMP2,NCSTN,NFAM1,CD14,ATP6AP2,CD53,TNFAIP6,TNFRSF1B
Pathway	132956	Metabolic pathways	BioSystems: KEGG	4.047e-12	1.392e-09	79	AGPAT5,RPN1,RPN2,MGAT4A,B3GALT5,PLD3,ADK,ACSL3,ACSL4,MGAT1,CEPT1,MGAT2,PIGC,MSMO1,SC5D,HPRT1,ALG5,UGCG,PLA2G10,SDHC,SDHD,CERS2,PLA2G3,DOLK,SPTLC1,PON2,COX8A,POMGNT1,ATP5MF,IDH3A,ALG2,PRDX6,ATP5MG,C1GALT1C1,PPT1,PLPP1,PLPP3,ASAH1,ATP6V0A4,EBP,PIGW,B3GALNT1,ATP6V1C1,ATP6V0B,ATP6AP1,GALNT1,GALNT2,GALNT3,MBOAT1,SQLE,CYP51A1,AKR1D1,PTDSS1,DAD1,GBA,NDUFA4,GCNT1,NDUFB5,MBOAT2,PTGS2,DDOST,STT3A,XYLT2,MOG…
Pathway	1268689	SRP-dependent cotranslational protein targeting to membrane	BioSystems: REACTOME	6.721e-12	1.981e-09	21	RPL27,RPL34,RPN1,RPN2,RPS13,RPS17,RPS20,RPS21,RPS26,RPS27,RPS29,SRPRB,SPCS3,SPCS2,SEC11C,SSR3,SSR4,DDOST,SEC61B,TRAM1,SEC11A
Pathway	82975	N-Glycan biosynthesis	BioSystems: KEGG	4.989e-10	1.287e-07	13	RPN1,RPN2,MGAT4A,MGAT1,MGAT2,ALG5,DOLK,ALG2,DAD1,DDOST,STT3A,MOGS,STT3B
Pathway	M11079	N-Glycan biosynthesis	MSigDB C2 BIOCARTA (v7.3)	2.901e-09	6.184e-07	12	RPN1,RPN2,MGAT4A,MGAT1,MGAT2,ALG5,ALG2,DAD1,DDOST,STT3A,MOGS,STT3B
Pathway	413373	N-glycosylation by oligosaccharyltransferase	BioSystems: KEGG	2.998e-09	6.184e-07	6	RPN1,RPN2,DAD1,DDOST,STT3A,STT3B
Pathway	1268678	Translation	BioSystems: REACTOME	5.762e-09	1.021e-06	21	RPL27,RPL34,RPN1,RPN2,RPS13,RPS17,RPS20,RPS21,RPS26,RPS27,RPS29,SRPRB,SPCS3,SPCS2,SEC11C,SSR3,SSR4,DDOST,SEC61B,TRAM1,SEC11A
Pathway	M5872	Steroid biosynthesis	MSigDB C2 BIOCARTA (v7.3)	6.365e-09	1.021e-06	8	MSMO1,SC5D,EBP,SOAT1,SQLE,CYP51A1,DHCR7,LIPA
Pathway	1268714	Asparagine N-linked glycosylation	BioSystems: REACTOME	6.436e-09	1.021e-06	28	RPN1,RPN2,BET1,MGAT4A,MAGT1,MGAT1,MGAT2,ALG5,DERL1,MCFD2,DOLK,ALG2,EDEM2,FUCA1,CTSZ,DAD1,DDOST,STT3A,NEU1,MOGS,TMED2,LMAN2,KDELR2,DERL2,TMED7,MANEA,B4GALNT2,RNF139
Pathway	1268677	Metabolism of proteins	BioSystems: REACTOME	9.301e-09	1.371e-06	84	RPL27,RPL34,RPN1,RPN2,BET1,MGAT4A,RPS13,RPS17,RPS20,RPS21,RPS26,RPS27,RPS29,MAGT1,DNAJB9,SRPRB,GRPEL2,SPCS3,MGAT1,MGAT2,UBE2D2,PIGC,SEMA5B,H4C11,ALG5,MME,ITM2B,H2AC12,VDAC3,DERL1,MCFD2,DOLK,POMGNT1,XPNPEP2,ALG2,C1GALT1C1,SLC30A5,EDEM2,CST3,PIGW,FUCA1,RAB21,CTSD,CTSZ,GALNT1,GALNT2,GALNT3,PSMB3,SPCS2,DAD1,GBA,SEC11C,GCNT1,SSR3,SSR4,DDOST,STT3A,BMI1,TIMM8A,NEU1,MOGS,SUMF1,SEC61B,TMED2,LMAN2,GNAI1,GN…
Pathway	82937	Steroid biosynthesis	BioSystems: KEGG	3.066e-08	4.216e-06	8	MSMO1,SC5D,EBP,SOAT1,SQLE,CYP51A1,DHCR7,LIPA
Pathway	82994	Sphingolipid metabolism	BioSystems: KEGG	4.602e-08	5.934e-06	11	ACER3,UGCG,CERS2,SPTLC1,PLPP1,PLPP3,ASAH1,GBA,SGPP1,NEU1,CERS5
Pathway	M39780	Omega-9 FA synthesis	MSigDB C2 BIOCARTA (v7.3)	1.103e-07	1.338e-05	7	ELOVL5,ACSL3,ACSL4,SCD,FADS2,ELOVL2,FADS1
Pathway	1270097	Sphingolipid metabolism	BioSystems: REACTOME	1.677e-07	1.921e-05	14	ACER3,UGCG,CERS2,SPTLC1,PLPP1,PLPP3,ASAH1,B3GALNT1,SPTSSA,GBA,SGPP1,NEU1,SUMF1,CERS5
Pathway	868084	Fatty acid metabolism	BioSystems: KEGG	6.12e-07	5.718e-05	10	ELOVL5,ACSL3,ACSL4,SCD,FADS2,PPT1,ELOVL2,HACD2,FADS1,HSD17B12
Pathway	1270013	Synthesis of very long-chain fatty acyl-CoAs	BioSystems: REACTOME	6.225e-07	5.718e-05	8	ELOVL5,ELOVL7,ACSL3,ACSL4,PPT1,ELOVL2,HACD2,HSD17B12
Pathway	142266	cholesterol biosynthesis II (via 24,25-dihydrolanosterol)	BioSystems: BIOCYC	6.375e-07	5.718e-05	6	MSMO1,SC5D,EBP,SQLE,CYP51A1,DHCR7
Pathway	142267	cholesterol biosynthesis I	BioSystems: BIOCYC	6.375e-07	5.718e-05	6	MSMO1,SC5D,EBP,SQLE,CYP51A1,DHCR7
Pathway	142268	cholesterol biosynthesis III (via desmosterol)	BioSystems: BIOCYC	6.375e-07	5.718e-05	6	MSMO1,SC5D,EBP,SQLE,CYP51A1,DHCR7
Pathway	167325	Protein processing in endoplasmic reticulum	BioSystems: KEGG	8.185e-07	7.035e-05	18	RPN1,RPN2,UBE2D2,DERL1,EDEM2,SELENOS,DAD1,SSR3,SSR4,DDOST,STT3A,MOGS,SEC61B,LMAN2,ERP29,DERL2,STT3B,TRAM1
Pathway	M15955	Sphingolipid metabolism	MSigDB C2 BIOCARTA (v7.3)	8.974e-07	7.405e-05	9	ACER3,UGCG,SPTLC1,PLPP1,PLPP3,ASAH1,GBA,SGPP1,NEU1
Pathway	153910	Phagosome	BioSystems: KEGG	1.289e-06	0.0001023	17	MRC1,COMP,MSR1,ATP6V0A4,CTSS,ATP6V1C1,ATP6V0B,ATP6AP1,ITGA2,ITGAV,SEC61B,ATP6V0E1,LAMP1,LAMP2,CD14,M6PR,ATP6V0A2
Pathway	M11673	Biosynthesis of unsaturated fatty acids	MSigDB C2 BIOCARTA (v7.3)	1.423e-06	0.0001088	7	ELOVL5,SCD,FADS2,ELOVL2,HACD2,FADS1,HSD17B12
Pathway	M39789	Omega-3/Omega-6 FA synthesis	MSigDB C2 BIOCARTA (v7.3)	1.774e-06	0.0001307	6	ELOVL5,ACSL3,ACSL4,FADS2,ELOVL2,FADS1
Pathway	83034	Biosynthesis of unsaturated fatty acids	BioSystems: KEGG	1.998e-06	0.0001421	7	ELOVL5,SCD,FADS2,ELOVL2,HACD2,FADS1,HSD17B12
Pathway	1270012	Fatty Acyl-CoA Biosynthesis	BioSystems: REACTOME	2.302e-06	0.0001583	10	ELOVL5,ELOVL7,ACSL3,ACSL4,SCD,PPT1,DBI,ELOVL2,HACD2,HSD17B12
Pathway	1269203	Innate Immune System	BioSystems: REACTOME	2.48e-06	0.000165	65	MAN2B1,CD46,MAGT1,PLD3,TLR8,MET,TYROBP,UBE2D2,MGST1,PIK3CB,QPCT,MME,NPC2,ENPP4,PRDX6,ASAH1,ATP6V0A4,RNASET2,CST3,TMEM30A,FUCA1,RAP2C,CTSD,CTSS,CTSZ,LGMN,ATP6V1C1,ATP6V0B,PSEN1,PSMB3,SIRPA,CREG1,ITGAV,DDOST,TMBIM1,CEACAM1,GGH,CMTM6,QSOX1,NEU1,RNF125,PTPRJ,SURF4,C2,GNS,GLIPR1,RAP1B,ATP6V0E1,CAPZA2,SLC44A2,LAMP1,GRN,LAMP2,NCSTN,NFAM1,ARPC3,ACTR3,CD14,CD86,ATP6AP2,TREM2,CD53,TNFAIP6,TNFRSF1B,ATP6V0A2
Pathway	M39784	Sphingolipid Metabolism (integrated pathway)	MSigDB C2 BIOCARTA (v7.3)	3.733e-06	0.0002366	7	UGCG,CERS2,SPTLC1,PLPP3,ASAH1,SGPP1,CERS5
Pathway	M19540	Oxidative phosphorylation	MSigDB C2 BIOCARTA (v7.3)	3.784e-06	0.0002366	15	SDHC,SDHD,COX8A,ATP5MF,ATP5MG,ATP6V0A4,ATP12A,ATP6V1C1,ATP6V0B,ATP6AP1,NDUFA4,NDUFB5,ATP6V0E1,COX7A2L,ATP6V0A2
Pathway	82942	Oxidative phosphorylation	BioSystems: KEGG	4.159e-06	0.0002524	15	SDHC,SDHD,COX8A,ATP5MF,ATP5MG,ATP6V0A4,ATP12A,ATP6V1C1,ATP6V0B,ATP6AP1,NDUFA4,NDUFB5,ATP6V0E1,COX7A2L,ATP6V0A2
Pathway	413390	Cholesterol biosynthesis, squalene 2,3-epoxide => cholesterol	BioSystems: KEGG	6.441e-06	0.0003797	5	MSMO1,SC5D,EBP,CYP51A1,DHCR7
Pathway	83101	Vibrio cholerae infection	BioSystems: KEGG	9.6e-06	0.0005502	9	SLC12A2,ATP6V0A4,ATP6V1C1,ATP6V0B,ATP6AP1,SEC61B,KDELR2,ATP6V0E1,ATP6V0A2
Pathway	M39501	Sphingolipid pathway	MSigDB C2 BIOCARTA (v7.3)	1.403e-05	0.000782	7	UGCG,CERS2,SPTLC1,PLPP1,ASAH1,GBA,CERS5
Pathway	1270011	Triglyceride Biosynthesis	BioSystems: REACTOME	1.551e-05	0.0008249	11	AGPAT5,ELOVL5,ELOVL7,ACSL3,ACSL4,SCD,PPT1,DBI,ELOVL2,HACD2,HSD17B12
Pathway	M17906	Vibrio cholerae infection	MSigDB C2 BIOCARTA (v7.3)	1.559e-05	0.0008249	9	SLC12A2,ATP6V0A4,ATP6V1C1,ATP6V0B,ATP6AP1,SEC61B,KDELR2,ATP6V0E1,ATP6V0A2
Pathway	SMP00023	Steroid Biosynthesis	SMPDB	1.669e-05	0.000861	6	MSMO1,EBP,SOAT1,SQLE,CYP51A1,LIPA
Pathway	413482	Fatty acid biosynthesis, elongation, endoplasmic reticulum	BioSystems: KEGG	1.714e-05	0.0008623	5	ELOVL5,ELOVL7,ELOVL2,HACD2,HSD17B12
Pathway	M39848	Cholesterol Biosynthesis with Skeletal Dysplasias	MSigDB C2 BIOCARTA (v7.3)	1.91e-05	0.0009379	4	SC5D,EBP,CYP51A1,DHCR7
Pathway	1271888	docosahexaenoate biosynthesis III (mammals)	BioSystems: BIOCYC	2.18e-05	0.001046	3	ELOVL5,FADS2,ELOVL2
Pathway	1270098	Sphingolipid de novo biosynthesis	BioSystems: REACTOME	2.407e-05	0.001129	8	ACER3,CERS2,SPTLC1,PLPP1,PLPP3,SPTSSA,SGPP1,CERS5
Pathway	83041	Protein export	BioSystems: KEGG	2.963e-05	0.001358	6	SRPRB,SPCS3,SPCS2,SEC11C,SEC61B,SEC11A
Pathway	MAP00512_O_Glycans_biosynthesis	MAP00512 O Glycans biosynthesis	GenMAPP	3.735e-05	0.001561	4	GALNT1,GALNT2,GALNT3,GCNT1
Pathway	M39608	Cholesterol Biosynthesis Pathway	MSigDB C2 BIOCARTA (v7.3)	3.819e-05	0.001561	5	MSMO1,SC5D,SQLE,CYP51A1,DHCR7
Pathway	MAP00510_N_Glycans_biosynthesis	MAP00510 N Glycans biosynthesis	GenMAPP	3.819e-05	0.001561	5	MGAT1,MGAT2,ALG5,DDOST,MOGS
Pathway	M39863	Sphingolipid Metabolism (general overview)	MSigDB C2 BIOCARTA (v7.3)	3.859e-05	0.001561	6	UGCG,CERS2,SPTLC1,PLPP3,ASAH1,SGPP1
Pathway	M6981	Protein export	MSigDB C2 BIOCARTA (v7.3)	3.859e-05	0.001561	6	SRPRB,SPCS3,SPCS2,SEC11C,SEC61B,SEC11A
Pathway	1270037	Cholesterol biosynthesis	BioSystems: REACTOME	3.859e-05	0.001561	6	MSMO1,SC5D,EBP,SQLE,CYP51A1,DHCR7
Pathway	1268701	Post-translational protein modification	BioSystems: REACTOME	4.698e-05	0.001864	51	RPN1,RPN2,BET1,MGAT4A,MAGT1,MGAT1,MGAT2,UBE2D2,PIGC,SEMA5B,ALG5,H2AC12,VDAC3,DERL1,MCFD2,DOLK,POMGNT1,XPNPEP2,ALG2,C1GALT1C1,EDEM2,PIGW,FUCA1,RAB21,CTSZ,GALNT1,GALNT2,GALNT3,PSMB3,DAD1,GCNT1,DDOST,STT3A,BMI1,NEU1,MOGS,SUMF1,TMED2,LMAN2,KDELR2,RAB17,PIGK,PIGS,DERL2,H2AC19,TMED7,MANEA,ICMT,B4GALNT2,RNF139,UBE2W
Pathway	82934	Fatty acid elongation	BioSystems: KEGG	4.96e-05	0.001895	6	ELOVL5,ELOVL7,PPT1,ELOVL2,HACD2,HSD17B12
Pathway	142269	superpathway of cholesterol biosynthesis	BioSystems: BIOCYC	4.96e-05	0.001895	6	MSMO1,SC5D,EBP,SQLE,CYP51A1,DHCR7
Pathway	82989	Glycerophospholipid metabolism	BioSystems: KEGG	6.267e-05	0.002351	11	AGPAT5,PLD3,CEPT1,PLA2G10,PLA2G3,PLPP1,PLPP3,MBOAT1,PTDSS1,MBOAT2,LPGAT1
Pathway	1269442	Insulin receptor recycling	BioSystems: REACTOME	7.909e-05	0.002914	6	ATP6V0A4,ATP6V1C1,ATP6V0B,ATP6AP1,ATP6V0E1,ATP6V0A2
Pathway	1339145	Cholesterol biosynthesis via lathosterol	BioSystems: REACTOME	8.3e-05	0.002952	3	SC5D,EBP,DHCR7
Pathway	1339144	Cholesterol biosynthesis via desmosterol	BioSystems: REACTOME	8.3e-05	0.002952	3	SC5D,EBP,DHCR7
Pathway	PW:0000454	cholesterol biosynthetic	Pathway Ontology	0.0001017	0.003557	5	SC5D,EBP,SQLE,CYP51A1,DHCR7
Pathway	1270086	Linoleic acid (LA) metabolism	BioSystems: REACTOME	0.0001072	0.003686	4	ELOVL5,FADS2,ELOVL2,FADS1
Pathway	MAP03070_Type_III_secretion_system	MAP03070 Type III secretion system	GenMAPP	0.0001349	0.00449	5	ATP6V0A4,ATP6V1C1,ATP6V0B,ATP6AP1,ATP6V0E1
Pathway	MAP00193_ATP_synthesis	MAP00193 ATP synthesis	GenMAPP	0.0001349	0.00449	5	ATP6V0A4,ATP6V1C1,ATP6V0B,ATP6AP1,ATP6V0E1
Pathway	1269949	Transferrin endocytosis and recycling	BioSystems: REACTOME	0.0001479	0.004842	6	ATP6V0A4,ATP6V1C1,ATP6V0B,ATP6AP1,ATP6V0E1,ATP6V0A2
Pathway	P04395	Vasopressin synthesis	PantherDB	0.0001648	0.005312	4	SPCS3,SPCS2,SEC11C,SEC11A
Pathway	MAP00195_Photosynthesis	MAP00195 Photosynthesis	GenMAPP	0.0001758	0.005581	5	ATP6V0A4,ATP6V1C1,ATP6V0B,ATP6AP1,ATP6V0E1
Pathway	1269948	Iron uptake and transport	BioSystems: REACTOME	0.000189	0.005908	7	SLC40A1,ATP6V0A4,ATP6V1C1,ATP6V0B,ATP6AP1,ATP6V0E1,ATP6V0A2
Pathway	M39467	Globo Sphingolipid Metabolism	MSigDB C2 BIOCARTA (v7.3)	0.0002256	0.006946	5	B3GALT5,B3GALNT1,GALNT2,GCNT1,A4GALT
Pathway	MAP00600_Sphingoglycolipid_metabolism	MAP00600 Sphingoglycolipid metabolism	GenMAPP	0.0002418	0.007336	4	UGCG,ASAH1,GBA,NEU1
Pathway	1270054	Glycerophospholipid biosynthesis	BioSystems: REACTOME	0.0002648	0.007918	12	PLBD1,AGPAT5,PLD3,CEPT1,PLA2G10,PLA2G3,MBOAT1,PTDSS1,MBOAT2,LPGAT1,SLC44A2,SLC44A1
Pathway	1268752	Synthesis, secretion, and inactivation of Glucose-dependent Insulinotropic Polypeptide (GIP)	BioSystems: REACTOME	0.0003416	0.01007	4	SPCS3,SPCS2,SEC11C,SEC11A
Pathway	SMP00034	Sphingolipid Metabolism	SMPDB	0.0003564	0.01035	5	ACER3,UGCG,SPTLC1,PLPP1,GBA
Pathway	1270008	LDL-mediated lipid transport	BioSystems: REACTOME	0.00044	0.01261	5	NCEH1,NPC2,SOAT1,NPC1,LIPA
Pathway	M39377	Zinc homeostasis	MSigDB C2 BIOCARTA (v7.3)	0.0004916	0.01389	6	SLC39A4,SLC30A5,SLC39A1,SLC39A11,SLC30A4,SLC39A10
Pathway	1269930	Metal ion SLC transporters	BioSystems: REACTOME	0.0005376	0.01446	5	SLC39A4,SLC40A1,SLC30A5,SLC39A1,SLC39A10
Pathway	M39813	Glycosylation and related congenital defects	MSigDB C2 BIOCARTA (v7.3)	0.0005376	0.01446	5	MAGT1,MGAT2,DOLK,ALG2,MOGS
Pathway	1269716	Nonsense-Mediated Decay (NMD)	BioSystems: REACTOME	0.0005397	0.01446	11	RPL27,MAGOH,RPL34,RPS13,RPS17,RPS20,RPS21,RPS26,RPS27,RPS29,SMG8
Pathway	1269717	Nonsense Mediated Decay (NMD) enhanced by the Exon Junction Complex (EJC)	BioSystems: REACTOME	0.0005397	0.01446	11	RPL27,MAGOH,RPL34,RPS13,RPS17,RPS20,RPS21,RPS26,RPS27,RPS29,SMG8
Pathway	83102	Epithelial cell signaling in Helicobacter pylori infection	BioSystems: KEGG	0.0005628	0.0147	8	MET,ATP6V0A4,ATP6V1C1,ATP6V0B,ATP6AP1,F11R,ATP6V0E1,ATP6V0A2
Pathway	M16848	Epithelial cell signaling in Helicobacter pylori infection	MSigDB C2 BIOCARTA (v7.3)	0.0005628	0.0147	8	MET,ATP6V0A4,ATP6V1C1,ATP6V0B,ATP6AP1,F11R,ATP6V0E1,ATP6V0A2
Pathway	1270084	alpha-linolenic (omega3) and linoleic (omega6) acid metabolism	BioSystems: REACTOME	0.0006241	0.0159	4	ELOVL5,FADS2,ELOVL2,FADS1
Pathway	1270085	alpha-linolenic acid (ALA) metabolism	BioSystems: REACTOME	0.0006241	0.0159	4	ELOVL5,FADS2,ELOVL2,FADS1
Pathway	1270244	Extracellular matrix organization	BioSystems: REACTOME	0.0006694	0.01684	19	MATN3,COL6A5,MMP12,MMP13,VCAM1,COMP,CTSD,CTSS,PSEN1,SPP1,ADAM9,ITGA2,ITGAV,CEACAM1,BMP7,F11R,NCSTN,TGFB2,LRP4
Pathway	M39844	Metabolism of alpha-linolenic acid	MSigDB C2 BIOCARTA (v7.3)	0.0006822	0.01696	3	FADS2,PTGS2,FADS1
Pathway	M189	Ribosome	MSigDB C2 BIOCARTA (v7.3)	0.000732	0.01798	9	RPL27,RPL34,RPS13,RPS17,RPS20,RPS21,RPS26,RPS27,RPS29
Pathway	1268682	Formation of the ternary complex, and subsequently, the 43S complex	BioSystems: REACTOME	0.0007707	0.01871	7	RPS13,RPS17,RPS20,RPS21,RPS26,RPS27,RPS29
Pathway	413362	O-glycan biosynthesis, mucin type core	BioSystems: KEGG	0.0007804	0.01872	5	C1GALT1C1,GALNT1,GALNT2,GALNT3,GCNT1
Pathway	413369	Glycosphingolipid biosynthesis, globo-series, LacCer => Gb4Cer	BioSystems: KEGG	0.00079	0.01873	2	B3GALNT1,A4GALT
Pathway	M17844	Other glycan degradation	MSigDB C2 BIOCARTA (v7.3)	0.0008141	0.01887	4	MAN2B1,FUCA1,GBA,NEU1
Pathway	524497	Sphingosine biosynthesis	BioSystems: KEGG	0.0008141	0.01887	4	CERS2,SPTLC1,ASAH1,CERS5
Pathway	M39495	Cytoplasmic Ribosomal Proteins	MSigDB C2 BIOCARTA (v7.3)	0.0008621	0.01976	9	RPL27,RPL34,RPS13,RPS17,RPS20,RPS21,RPS26,RPS27,RPS29
Pathway	1268746	Peptide hormone metabolism	BioSystems: REACTOME	0.0009338	0.02117	9	SPCS3,MME,SLC30A5,CTSD,CTSZ,SPCS2,SEC11C,ATP6AP2,SEC11A
Pathway	1270039	Activation of gene expression by SREBF (SREBP)	BioSystems: REACTOME	0.0009871	0.02214	6	SC5D,SCD,SQLE,CYP51A1,SREBF1,DHCR7
Pathway	1269931	Zinc transporters	BioSystems: REACTOME	0.001041	0.02286	4	SLC39A4,SLC30A5,SLC39A1,SLC39A10
Pathway	413384	Triacylglycerol biosynthesis	BioSystems: KEGG	0.001041	0.02286	4	PLPP1,PLPP3,MBOAT1,MBOAT2
Pathway	1268691	Peptide chain elongation	BioSystems: REACTOME	0.001092	0.02333	9	RPL27,RPL34,RPS13,RPS17,RPS20,RPS21,RPS26,RPS27,RPS29
Pathway	1269120	Viral mRNA Translation	BioSystems: REACTOME	0.001092	0.02333	9	RPL27,RPL34,RPS13,RPS17,RPS20,RPS21,RPS26,RPS27,RPS29
Pathway	1270058	Acyl chain remodelling of PE	BioSystems: REACTOME	0.001097	0.02333	5	PLBD1,PLA2G10,PLA2G3,MBOAT1,MBOAT2
Pathway	83083	Leukocyte transendothelial migration	BioSystems: KEGG	0.001259	0.02574	10	PIK3CB,VCAM1,CLDN3,CLDN7,OCLN,F11R,GNAI1,RAP1B,CLDN8,CLDN6
Pathway	MAP00190_Oxidative_phosphorylation	MAP00190 Oxidative phosphorylation	GenMAPP	0.001268	0.02574	6	ATP6V0A4,ATP12A,ATP6V1C1,ATP6V0B,ATP6AP1,ATP6V0E1
Pathway	1269903	Transmembrane transport of small molecules	BioSystems: REACTOME	0.001284	0.02574	33	MAGT1,SGK3,CLCN3,SLC35A2,DERL1,SLC39A4,SLC40A1,SLC30A5,SLC12A2,SLC20A1,ATP6V0A4,ATP12A,ATP1B3,SLC2A12,ATP6V1C1,ATP6V0B,ATP6AP1,SLC39A1,PSMB3,SLC35B2,SLC38A1,NIPA2,GNG5,GNG10,ATP6V0E1,DERL2,SLC44A2,SLC39A10,SLC7A7,SLC44A1,SLC16A7,SLC33A1,ATP6V0A2
Pathway	M6929	O-Glycan biosynthesis	MSigDB C2 BIOCARTA (v7.3)	0.001287	0.02574	5	C1GALT1C1,GALNT1,GALNT2,GALNT3,GCNT1
Pathway	M9131	Glycerophospholipid metabolism	MSigDB C2 BIOCARTA (v7.3)	0.001291	0.02574	8	PLA2G10,PLA2G3,PLPP1,PLPP3,MBOAT1,PTDSS1,MBOAT2,LPGAT1
Pathway	82976	Other glycan degradation	BioSystems: KEGG	0.00131	0.02574	4	MAN2B1,FUCA1,GBA,NEU1
Pathway	1268749	Metabolism of Angiotensinogen to Angiotensins	BioSystems: REACTOME	0.00131	0.02574	4	MME,CTSD,CTSZ,ATP6AP2
Pathway	PW:0000485	eicosanoids metabolic	Pathway Ontology	0.00131	0.02574	4	MGST1,MGST2,PLA2G10,PTGS2
Pathway	1339156	Selenocysteine synthesis	BioSystems: REACTOME	0.001369	0.02664	9	RPL27,RPL34,RPS13,RPS17,RPS20,RPS21,RPS26,RPS27,RPS29
Pathway	82990	Ether lipid metabolism	BioSystems: KEGG	0.001429	0.02745	6	PLD3,CEPT1,PLA2G10,PLA2G3,PLPP1,PLPP3
Pathway	M2164	Leukocyte transendothelial migration	MSigDB C2 BIOCARTA (v7.3)	0.001437	0.02745	10	PIK3CB,VCAM1,CLDN3,CLDN7,OCLN,F11R,GNAI1,RAP1B,CLDN8,CLDN6
Pathway	1268692	Eukaryotic Translation Termination	BioSystems: REACTOME	0.001473	0.02787	9	RPL27,RPL34,RPS13,RPS17,RPS20,RPS21,RPS26,RPS27,RPS29
Pathway	82977	Mucin type O-glycan biosynthesis	BioSystems: KEGG	0.0015	0.02788	5	C1GALT1C1,GALNT1,GALNT2,GALNT3,GCNT1
Pathway	1270236	Tight junction interactions	BioSystems: REACTOME	0.0015	0.02788	5	CLDN3,CLDN7,F11R,CLDN8,CLDN6
Pathway	1268690	Eukaryotic Translation Elongation	BioSystems: REACTOME	0.001583	0.02915	9	RPL27,RPL34,RPS13,RPS17,RPS20,RPS21,RPS26,RPS27,RPS29
Pathway	1270099	Glycosphingolipid metabolism	BioSystems: REACTOME	0.001606	0.02932	6	UGCG,ASAH1,B3GALNT1,GBA,NEU1,SUMF1
Pathway	1268748	Synthesis, secretion, and deacylation of Ghrelin	BioSystems: REACTOME	0.001623	0.02933	4	SPCS3,SPCS2,SEC11C,SEC11A
Pathway	1144995	Sphingolipid signaling pathway	BioSystems: KEGG	0.001635	0.02933	10	PIK3CB,CERS2,SPTLC1,ASAH1,CTSD,SGPP1,GNAI1,PPP2R3C,CERS5,TNFRSF1A
Pathway	M39806	Nonalcoholic fatty liver disease	MSigDB C2 BIOCARTA (v7.3)	0.001686	0.02999	12	PIK3CB,VCAM1,SDHC,SDHD,COX8A,SREBF1,NDUFA4,NDUFB5,ADIPOR2,ADIPOR1,COX7A2L,TNFRSF1A
Pathway	1268685	Ribosomal scanning and start codon recognition	BioSystems: REACTOME	0.001739	0.03066	7	RPS13,RPS17,RPS20,RPS21,RPS26,RPS27,RPS29
Pathway	1269718	Nonsense Mediated Decay (NMD) independent of the Exon Junction Complex (EJC)	BioSystems: REACTOME	0.001823	0.03187	9	RPL27,RPL34,RPS13,RPS17,RPS20,RPS21,RPS26,RPS27,RPS29
Pathway	1268684	Translation initiation complex formation	BioSystems: REACTOME	0.001907	0.03306	7	RPS13,RPS17,RPS20,RPS21,RPS26,RPS27,RPS29
Pathway	1268751	Synthesis, secretion, and inactivation of Glucagon-like Peptide-1 (GLP-1)	BioSystems: REACTOME	0.001985	0.03384	4	SPCS3,SPCS2,SEC11C,SEC11A
Pathway	M39459	Metabolism of Spingolipids in ER and Golgi apparatus	MSigDB C2 BIOCARTA (v7.3)	0.001985	0.03384	4	UGCG,B3GALNT1,GALNT1,SGPP1
Pathway	1269138	ROS, RNS production in phagocytes	BioSystems: REACTOME	0.002002	0.03384	5	ATP6V0A4,ATP6V1C1,ATP6V0B,ATP6V0E1,ATP6V0A2
Pathway	1270053	Phospholipid metabolism	BioSystems: REACTOME	0.002017	0.03384	14	PLBD1,AGPAT5,PLD3,CEPT1,PIK3CB,PLA2G10,PLA2G3,GDE1,MBOAT1,PTDSS1,MBOAT2,LPGAT1,SLC44A2,SLC44A1
Pathway	1268683	Activation of the mRNA upon binding of the cap-binding complex and eIFs, and subsequent binding to 43S	BioSystems: REACTOME	0.002087	0.03473	7	RPS13,RPS17,RPS20,RPS21,RPS26,RPS27,RPS29
Pathway	1268725	Transport to the Golgi and subsequent modification	BioSystems: REACTOME	0.002185	0.03571	12	BET1,MGAT4A,MGAT1,MGAT2,MCFD2,FUCA1,CTSZ,TMED2,LMAN2,KDELR2,TMED7,MANEA
Pathway	1269933	Zinc influx into cells by the SLC39 gene family	BioSystems: REACTOME	0.002198	0.03571	3	SLC39A4,SLC39A1,SLC39A10
Pathway	672815	icosapentaenoate biosynthesis II (metazoa)	BioSystems: BIOCYC	0.002198	0.03571	3	ELOVL5,ACSL3,FADS2
Pathway	PW:0000563	adiponectin signaling	Pathway Ontology	0.002261	0.03644	2	ADIPOR2,ADIPOR1
Pathway	1269923	Transport of glucose and other sugars, bile salts and organic acids, metal ions and amine compounds	BioSystems: REACTOME	0.002723	0.04355	9	SLC39A4,SLC40A1,SLC30A5,SLC2A12,SLC39A1,SLC44A2,SLC39A10,SLC44A1,SLC16A7
Pathway	M39440	Fatty Acid Biosynthesis	MSigDB C2 BIOCARTA (v7.3)	0.002869	0.04553	4	ACSL3,ACSL4,SCD,ECHDC1
Pathway	1268681	Formation of a pool of free 40S subunits	BioSystems: REACTOME	0.002902	0.0457	9	RPL27,RPL34,RPS13,RPS17,RPS20,RPS21,RPS26,RPS27,RPS29
Pathway	862188	Non-alcoholic fatty liver disease (NAFLD)	BioSystems: KEGG	0.002934	0.04585	11	PIK3CB,SDHC,SDHD,COX8A,SREBF1,NDUFA4,NDUFB5,ADIPOR2,ADIPOR1,COX7A2L,TNFRSF1A
Pathway	1268722	N-glycan trimming in the ER and Calnexin/Calreticulin cycle	BioSystems: REACTOME	0.002971	0.04609	5	DERL1,EDEM2,MOGS,DERL2,RNF139
Pathway	PW:0000034	oxidative phosphorylation	Pathway Ontology	0.003037	0.04676	6	SDHC,SDHD,ATP12A,ATP6AP1,NDUFB5,COX7A2L
